# Supplementary material for: Transcriptional landscape in rat intestines under hypobaric hypoxia
Source: PeerJ. 2021 Jul 29;9:e11823. doi: 10.7717/peerj.11823 (PMC8325916; doi:10.7717/peerj.11823)
Supplement: Supplemental Information 1 [file peerj-09-11823-s001.xlsx]

## Sheet: AMS-gutS-DEG
	W2S.S	W4S.S	W4S.W2S	AveExpr	F	P.Value	adj.P.Val
Tmco2	1.86675	3.25884	1.3921	-4.43829	31.662	7.60648e-05	0.737212
Adam23	-1.65414	-0.689244	0.964897	2.31485	30.895	8.39066e-05	0.737212
LOC103694864	1.01197	3.76365	2.75168	-1.87772	27.8261	0.000127075	0.737212
Ibsp	0.556405	-6.15412	-6.71052	-1.39027	26.0667	0.00016416	0.737212
Rln3	-2.03782	1.0622	3.10002	-4.40431	25.5363	0.000177847	0.737212
LOC108348322	-4.75759	-2.19187	2.56572	-3.79619	23.1651	0.000259071	0.828106
Cttnbp2	-1.54709	-0.0812296	1.46586	1.93404	20.4566	0.000415	0.828106
Fam71f1	0.0351615	1.9663	1.93114	-5.49537	20.0983	0.000443366	0.828106
Hsph1	-0.058752	-1.04725	-0.988493	6.83478	19.7673	0.000471697	0.828106
LOC102548472	1.84832	0.245531	-1.60279	-0.925272	19.1993	0.000525639	0.828106
Sp7	-1.41536	-2.28714	-0.871781	-3.94946	18.9904	0.000547352	0.828106
Mt2A	2.25835	1.0415	-1.21685	5.24268	18.7046	0.000578854	0.828106
Slc52a3	0.582765	1.43402	0.851256	3.21778	18.4739	0.000605899	0.828106
Tctex1d1	0.0351615	1.96442	1.92926	-5.49537	18.3048	0.000626713	0.828106
Matn4	-3.39714	0.267609	3.66475	-3.24332	17.624	0.000719828	0.828106
Rgs22	-3.55645	-1.11372	2.44274	-2.14533	17.338	0.00076392	0.828106
F10	-3.32757	2.46816	5.79574	-2.87717	16.9172	0.000834968	0.828106
Olr1	0.816138	2.95499	2.13886	-2.12486	16.7149	0.000871962	0.828106
Mir223	2.11087	0.204878	-1.90599	-5.58017	16.0662	0.00100491	0.828106
Hamp	-0.488771	3.70536	4.19413	-3.89582	15.5204	0.0011363	0.828106
Thbs2	-1.63997	0.405075	2.04504	3.42091	14.8747	0.00131984	0.828106
Retn	4.42017	-1.98571	-6.40589	-3.5768	14.7938	0.00134533	0.828106
LOC100909857	4.1753	5.74235	1.56705	-1.31997	14.6946	0.00137739	0.828106
Plp1	-1.28641	-0.525316	0.761097	2.79008	14.6394	0.00139562	0.828106
Ccr10	-0.711544	-1.43234	-0.720794	2.3925	14.6231	0.00140105	0.828106
RGD1563354	-2.15892	-1.76468	0.394248	2.59896	14.0734	0.0016007	0.828106
Tspan11	-1.67338	-0.910137	0.763242	1.6053	13.8885	0.00167549	0.828106
Hprt1	4.67062	0.899602	-3.77101	-0.316658	13.844	0.00169415	0.828106
Sarm1	-1.39917	-0.205187	1.19399	0.504622	13.6493	0.00177877	0.828106
Shisa2	0.620262	-1.63068	-2.25094	-1.04593	13.5551	0.0018215	0.828106
Bean1	-1.58998	-1.72816	-0.138179	2.12327	13.4297	0.00188042	0.828106
Zfp286a	-2.66451	0.0215701	2.68608	-1.84846	13.4273	0.00188155	0.828106
Plekhd1	0.518358	-1.52804	-2.0464	-1.33666	13.3476	0.00192026	0.828106
Slc2a10	0.163885	-0.93598	-1.09986	2.73998	13.1624	0.00201391	0.828106
Dgka	0.589236	1.47724	0.888003	6.69634	13.1336	0.00202898	0.828106
Hmox1	1.37472	0.529817	-0.8449	4.77805	12.9594	0.00212302	0.828106
Ak4	-1.99442	0.723988	2.71841	-1.45354	12.7347	0.00225238	0.828106
Mir6333	0.29715	-1.98365	-2.2808	-4.01831	12.6827	0.00228367	0.828106
Hist2h2ab	-0.310194	1.31935	1.62954	-2.46619	12.6309	0.00231536	0.828106
Slc35f1	-1.20673	-0.174806	1.03192	0.910863	12.4406	0.0024365	0.828106
Irx2	2.9131	0.2227	-2.6904	-4.55808	12.426	0.00244609	0.828106
Nqo1	1.41127	0.487077	-0.924191	5.24012	12.2621	0.00255721	0.828106
Ugcg	0.497213	1.06257	0.565355	5.83799	12.1697	0.00262254	0.828106
LOC103689968	-1.58493	-0.528945	1.05599	1.76335	12.1538	0.00263397	0.828106
LOC103690028	-1.58493	-0.528945	1.05599	1.76335	12.1538	0.00263397	0.828106
LOC100910275	-0.106462	-1.05195	-0.94549	3.3241	12.1067	0.00266822	0.828106
Ephb1	-1.62413	-0.0576114	1.56652	2.75319	12.0667	0.00269775	0.828106
Kcng1	-1.51404	-1.80057	-0.286527	0.909932	12.0372	0.00271976	0.828106
Plk3	0.660063	1.63278	0.972719	3.75191	11.9848	0.00275948	0.828106
Matn1	0.0351615	1.59014	1.55498	-5.65387	11.8453	0.00286862	0.828106
Sall4	0.152859	-1.46237	-1.61523	0.0528952	11.8436	0.00286997	0.828106
Mxd3	0.231666	1.13783	0.906166	6.33583	11.7133	0.00297675	0.828106
Rab24	0.231666	1.13783	0.906166	6.33583	11.7133	0.00297675	0.828106
Prss12	2.67722	1.65172	-1.02549	0.942561	11.5995	0.00307402	0.828106
Gpt	1.54151	1.50293	-0.0385798	8.61245	11.5216	0.00314275	0.828106
Vkorc1l1	0.982105	-0.244249	-1.22635	-0.517979	11.5174	0.00314654	0.828106
Slc27a4	1.1804	0.986132	-0.194267	8.97185	11.5116	0.00315179	0.828106
Slc30a10	2.95624	2.14072	-0.815518	5.08054	11.2783	0.00337004	0.828106
Calcr	2.15091	0.204878	-1.94603	-5.56907	11.2572	0.00339072	0.828106
Tmem120a	1.25981	1.45034	0.190536	6.76182	11.2066	0.00344089	0.828106
Gsta4	1.06285	0.530528	-0.532318	5.63279	11.1301	0.00351835	0.828106
Slc40a1	1.90327	-0.0340716	-1.93734	4.0281	11.0027	0.00365225	0.828106
NEWGENE_620180	1.90664	-0.0363984	-1.94303	4.01978	10.9809	0.00367573	0.828106
Slc6a19	1.97527	3.30948	1.3342	6.66233	10.9702	0.00368739	0.828106
Padi3	-0.74731	2.41355	3.16086	-4.23471	10.9352	0.00372569	0.828106
Phlda2	1.07691	1.47614	0.399231	4.10632	10.9289	0.00373257	0.828106
Sapcd1	-1.56883	0.0717382	1.64057	0.629923	10.9219	0.00374035	0.828106
Lrrc15	-1.50166	-1.84169	-0.340026	-0.572269	10.8957	0.00376949	0.828106
Sstr2	0.178268	-1.58127	-1.75953	-1.75393	10.821	0.00385403	0.828106
Reg4	1.86749	-0.64936	-2.51685	5.01898	10.8037	0.00387393	0.828106
Oacyl	-1.51977	1.1292	2.64897	-2.66879	10.7633	0.00392095	0.828106
Oas1g	-2.78755	0.154483	2.94203	-4.23991	10.7104	0.00398357	0.828106
Dnajb3	0.659443	1.00636	0.346913	4.60967	10.6267	0.00408512	0.828106
Hpgd	1.23014	0.761607	-0.46853	6.94745	10.5548	0.00417484	0.828106
Tppp3	-1.13117	-0.72748	0.403691	5.37949	10.554	0.00417583	0.828106
LOC100911949	3.38053	1.61998	-1.76055	-4.63755	10.5478	0.00418376	0.828106
LOC688801	-3.05141	-3.17186	-0.120458	-3.93389	10.4914	0.00425598	0.828106
Dusp10	-1.02582	0.476727	1.50254	1.55135	10.4864	0.00426245	0.828106
Hcn3	1.31067	0.294988	-1.01568	3.04342	10.4468	0.00431421	0.828106
Asz1	3.68248	3.43826	-0.24422	-1.97141	10.4117	0.00436081	0.828106
Myh10	-1.01175	-0.0101883	1.00157	3.75249	10.3492	0.0044451	0.828106
LOC103694874	1.66005	3.98131	2.32127	-1.8697	10.317	0.00448937	0.828106
Lrtm2	-2.07658	0.537951	2.61453	-3.53241	10.2881	0.00452946	0.828106
Tmem235	1.81073	2.40919	0.598464	-1.73004	10.1307	0.00475601	0.828106
Asb18	-3.88157	-0.479176	3.4024	-2.68938	10.1177	0.00477534	0.828106
RGD1563231	-0.8325	-2.56543	-1.73293	4.96071	10.0942	0.00481055	0.828106
Adtrp	1.17695	0.879854	-0.297091	5.75131	10.054	0.00487147	0.828106
Krt81	-1.54809	-1.37837	0.169717	-5.72756	10.0524	0.00487385	0.828106
Rag1	-1.54809	-1.37837	0.169717	-5.72756	10.0524	0.00487385	0.828106
Ptgr1	1.41863	0.769842	-0.64879	7.37739	10.022	0.00492066	0.828106
Tmem200a	-1.87544	0.177733	2.05317	0.121833	9.95174	0.00503065	0.828106
Il36b	-0.460841	-1.39111	-0.930267	0.626052	9.9113	0.00509535	0.828106
Alas2	2.3528	0.979332	-1.37347	1.32092	9.90736	0.00510171	0.828106
Cxcl2	0.658906	-1.86438	-2.52328	-0.680329	9.88529	0.0051375	0.828106
Cntn6	0.0351615	1.99277	1.95761	-5.49537	9.85982	0.00517918	0.828106
Tnp2	-2.57385	0.738308	3.31216	-4.15271	9.83154	0.00522596	0.828106
Calhm5	-1.87685	0.196726	2.07358	-1.91795	9.80959	0.00526262	0.828106
Ptgfr	-1.64102	0.151437	1.79246	-1.28793	9.71608	0.00542234	0.828106
Prelp	-1.05684	-0.66365	0.393186	6.84514	9.59296	0.00564173	0.828106
LOC103691893	3.53935	-0.693734	-4.23309	-4.2172	9.58628	0.00565393	0.828106
Dgat1	1.32117	1.20722	-0.113949	8.39253	9.57285	0.00567859	0.828106
RGD1309651	-2.32509	0.259383	2.58448	-0.114183	9.54736	0.00572571	0.828106
Cldn11	-0.691428	1.05159	1.74302	-0.562081	9.48069	0.00585127	0.828106
Fut7	1.08521	2.65369	1.56848	-1.75877	9.42625	0.0059563	0.828106
Ero1a	0.713171	-0.296142	-1.00931	6.12208	9.34805	0.00611121	0.828106
Gabra3	-2.95409	-1.55927	1.39482	-2.74845	9.3401	0.00612723	0.828106
Commd5	-0.0992161	0.988554	1.08777	0.329701	9.30323	0.0062022	0.828106
LOC108348189	-0.0992161	0.988554	1.08777	0.329701	9.30323	0.0062022	0.828106
Ddx43	2.10988	0.600034	-1.50985	-5.42167	9.27371	0.00626304	0.828106
Tff2	1.49995	-2.04958	-3.54953	-2.2438	9.27017	0.00627038	0.828106
Hs3st6	-0.177912	-1.79523	-1.61732	0.351929	9.23936	0.00633474	0.828106
Slc13a2	1.56063	2.24329	0.682655	6.62793	9.21671	0.00638257	0.828106
Trpc4	-2.01608	-0.487012	1.52907	0.355266	9.04685	0.00675564	0.828106
RGD1311744	-1.14596	-0.251369	0.894592	1.56671	9.02412	0.00680755	0.828106
Ido1	-0.778906	3.70377	4.48267	-2.09935	8.98238	0.00690418	0.828106
RT1-T24-3	-0.917008	0.185363	1.10237	2.94903	8.9636	0.00694816	0.828106
LOC100912163	2.21696	1.31201	-0.904947	0.359773	8.87976	0.00714888	0.828106
Akr1c2	3.31586	0.412194	-2.90367	-3.83274	8.83164	0.00726724	0.828106
Adgrf3	-0.50172	1.97109	2.47281	-4.59175	8.77539	0.00740866	0.828106
LOC367195	0.291617	1.78764	1.49602	-3.50779	8.7306	0.00752367	0.828106
Grm3	0.0345047	3.18444	3.14994	-4.47084	8.70676	0.00758576	0.828106
Avpr1b	-0.666505	-2.55192	-1.88541	-4.35974	8.70523	0.00758978	0.828106
Nr1d1	-1.41025	0.462181	1.87243	4.65275	8.69762	0.00760974	0.828106
Ldb2	-1.21717	-0.966371	0.250798	3.0145	8.6726	0.00767585	0.828106
Dll3	-3.03781	-2.63183	0.405972	-4.13264	8.6645	0.00769741	0.828106
Elovl2	-1.24572	-0.225221	1.0205	0.96972	8.64925	0.00773816	0.828106
Pdzd3	1.24378	1.47988	0.236098	4.79121	8.64653	0.00774546	0.828106
Zkscan2	-2.04334	0.418964	2.4623	-3.36543	8.57231	0.00794793	0.828106
Ccdc3	-1.9705	0.634414	2.60492	-1.37783	8.52689	0.00807502	0.828106
Il13ra2	-0.728096	3.62732	4.35541	-3.7519	8.52157	0.00809006	0.828106
Prr15	1.96533	2.34933	0.384004	5.46371	8.49043	0.00817883	0.828106
Pla2g5	-1.7104	0.74469	2.45509	0.551685	8.47207	0.00823171	0.828106
Mir342	0.563711	2.25689	1.69318	-5.22312	8.39789	0.00844968	0.828106
Unc5d	0.0351615	1.8058	1.77064	-5.56907	8.38819	0.00847871	0.828106
Nlgn3	-1.20057	-0.217922	0.982652	1.93141	8.37021	0.00853282	0.828106
Slc43a2	1.83588	2.2338	0.397914	6.93775	8.339	0.00862777	0.828106
Slpi	-0.827061	-3.41248	-2.58542	3.90535	8.33507	0.00863979	0.828106
Nme5	-2.46779	-1.04595	1.42184	-3.65422	8.33285	0.0086466	0.828106
Slc11a2	2.24983	0.349601	-1.90023	6.83021	8.28683	0.00878935	0.828106
Atp6v0d2	-2.82017	0.304089	3.12426	-4.17921	8.25494	0.00888991	0.828106
Faim	2.20143	2.4591	0.257672	-4.12012	8.23876	0.00894148	0.828106
LOC103690044	-2.62003	1.98649	4.60652	-2.83847	8.1856	0.0091135	0.828106
Spaca5	1.0402	-1.49051	-2.53071	-2.81301	8.16952	0.00916634	0.828106
Mir143	-0.834068	1.11603	1.9501	0.368382	8.16289	0.00918821	0.828106
Esr1	-0.956025	-1.13306	-0.177039	-1.41678	8.09954	0.00940063	0.828106
Wnk2	-1.87291	-0.589664	1.28325	3.31184	8.09264	0.0094241	0.828106
Abhd6	1.04811	0.999268	-0.0488456	6.42525	8.02642	0.00965327	0.828106
B3gnt4	1.08924	2.99496	1.90572	-4.75874	8.02599	0.00965475	0.828106
Dleu7	-2.09461	-0.581733	1.51287	-2.28928	8.02015	0.00967529	0.828106
Hsd17b11	1.17974	1.25465	0.0749031	7.86643	8.0171	0.00968603	0.828106
Slc26a7	0.359824	-1.10551	-1.46534	-2.68163	8.00163	0.00974079	0.828106
Alkal1	-1.79232	-2.15115	-0.358833	-5.33688	7.98106	0.00981413	0.828106
Arx	-1.40349	-0.665071	0.73842	0.418795	7.95394	0.00991188	0.828106
Calhm4	-2.39062	-0.401788	1.98883	-3.28514	7.94528	0.00994336	0.828106
Rnf225	-0.66766	1.90298	2.57064	-2.37791	7.92315	0.0100243	0.828106
Cyp26b1	-1.38752	-1.80524	-0.41772	4.39078	7.88712	0.0101578	0.828106
Gckr	2.31393	0.676078	-1.63785	-0.0348542	7.83019	0.0103733	0.828106
Pla2g12b	1.18257	1.45406	0.271491	4.5324	7.81445	0.0104338	0.828106
Clca5	-1.40559	-1.29592	0.109674	3.29508	7.79507	0.0105089	0.828106
RGD1560608	0.282542	4.19612	3.91357	-3.44682	7.79078	0.0105257	0.828106
Akr1c14	1.34327	1.07802	-0.265252	8.30203	7.78847	0.0105347	0.828106
Fam134b	-2.83885	-0.980449	1.8584	0.92614	7.76733	0.0106176	0.828106
UST4r	-1.34593	-1.51457	-0.168636	1.6067	7.74315	0.0107135	0.828106
Xpnpep1	1.01177	0.797052	-0.214718	8.12738	7.70752	0.0108567	0.828106
Sbspon	0.531876	1.37956	0.847688	1.02938	7.70677	0.0108597	0.828106
Apoa1	3.03979	2.81489	-0.224901	8.74679	7.69786	0.0108959	0.828106
Lrrc55	-0.727249	-1.39491	-0.667666	-0.933814	7.69342	0.010914	0.828106
Acox1	1.21299	0.864446	-0.348543	7.47127	7.69221	0.0109189	0.828106
Slc7a7	1.40827	1.89474	0.486473	6.32939	7.6855	0.0109464	0.828106
Ctnna3	-1.82485	0.335424	2.16027	-0.788622	7.67316	0.010997	0.828106
LOC100910833	2.44391	1.81439	-0.629521	-3.36605	7.65088	0.0110892	0.828106
Asic3	2.37349	2.9025	0.529003	-3.35245	7.65056	0.0110905	0.828106
Lgi4	-1.04753	-0.469933	0.577599	3.71168	7.63768	0.0111442	0.828106
Adamts16	2.15091	0.601132	-1.54978	-5.41057	7.62254	0.0112077	0.828106
Ptch1	-0.625641	-1.08588	-0.460243	6.20365	7.60343	0.0112886	0.828106
Ace2	2.89846	3.89345	0.994987	6.81269	7.58525	0.0113661	0.828106
Akr1b10	2.53197	1.11501	-1.41696	7.15196	7.55661	0.0114896	0.828106
Akr1b8	2.53197	1.11501	-1.41696	7.15196	7.55661	0.0114896	0.828106
Kantr	-0.18335	-1.0696	-0.886255	-0.126506	7.55109	0.0115136	0.828106
Abi3bp	-1.11436	0.0291295	1.14349	4.46864	7.5492	0.0115218	0.828106
Anpep	2.10232	2.47956	0.377241	9.16769	7.5345	0.0115861	0.828106
Pi15	0.23287	-2.1865	-2.41938	-0.639641	7.51859	0.0116561	0.828106
Mybpc1	-1.88028	2.23293	4.11321	-1.89166	7.51361	0.0116781	0.828106
Gemin7l1	1.05295	0.558113	-0.494837	0.907569	7.51045	0.0116921	0.828106
Lpal2	-3.0481	0.38282	3.43092	-1.61341	7.4969	0.0117524	0.828106
Olr1588	-0.518027	-1.8906	-1.37257	-2.63688	7.49139	0.011777	0.828106
Hba2	1.70964	0.272731	-1.43691	7.01876	7.47013	0.0118726	0.828106
Susd2	-0.462677	1.17058	1.63325	4.33105	7.43637	0.0120263	0.828106
Syt17	-1.02301	-0.887821	0.135191	1.58676	7.43105	0.0120508	0.828106
Pkhd1l1	-1.2943	0.173586	1.46789	2.02268	7.41058	0.0121454	0.828106
Fabp1	2.01702	1.7579	-0.259119	9.96176	7.40454	0.0121735	0.828106
Rorc	3.18806	1.25918	-1.92888	-4.3084	7.37729	0.0123012	0.828106
Armcx6	-1.31709	-0.909006	0.408087	0.925461	7.37044	0.0123336	0.828106
Trim72	-0.77841	-1.00425	-0.225842	2.005	7.36906	0.0123401	0.828106
Tsku	1.07457	1.18375	0.109173	5.3807	7.35221	0.0124202	0.828106
Dusp9	2.83876	2.02949	-0.809262	-3.03964	7.33297	0.0125124	0.828106
Wfdc21	2.29475	2.38758	0.0928306	2.47004	7.33287	0.0125129	0.828106
Rhd	1.98125	-0.976218	-2.95747	-2.96171	7.32649	0.0125437	0.828106
Trim6	-2.06349	-0.925407	1.13808	-1.88667	7.32643	0.012544	0.828106
Ky	-0.802715	1.37815	2.18086	-0.690412	7.32048	0.0125728	0.828106
Kcnd3	-1.5158	-0.711478	0.804325	2.54261	7.31372	0.0126056	0.828106
Gcnt7	1.1628	2.13191	0.969113	-2.06844	7.30772	0.0126348	0.828106
LOC102550375	0.0430928	2.14741	2.10432	-4.89764	7.30502	0.0126479	0.828106
Mir194-2	1.99885	2.30891	0.310055	-4.24581	7.28936	0.0127246	0.828106
Clec4b2	0.612855	-2.50242	-3.11527	0.757738	7.28623	0.0127401	0.828106
Cspg5	-1.03387	-0.846723	0.187142	1.93051	7.2203	0.0130697	0.828106
Cdh3	-1.07318	-0.619489	0.453687	2.54932	7.19074	0.0132209	0.828106
RGD1307537	-1.14366	0.554607	1.69827	-1.88544	7.16553	0.0133515	0.828106
Pcdhb12	0.456462	-1.01146	-1.46792	-0.848961	7.14423	0.0134631	0.828106
Tpsab1	4.41358	3.45013	-0.963448	-3.59224	7.11879	0.0135978	0.828106
Nyap1	1.08821	1.57997	0.491757	1.20571	7.10898	0.0136502	0.828106
Sh3tc2	-1.42235	-0.164856	1.25749	0.676069	7.10598	0.0136663	0.828106
Slc9b2	-2.68812	0.0987207	2.78684	-3.80195	7.0983	0.0137076	0.828106
Cavin4	-0.707077	-3.47218	-2.7651	-1.85922	7.09336	0.0137342	0.828106
Drd1	-3.6402	-1.18399	2.45622	-3.13599	7.07045	0.0138584	0.828106
Trpm6	0.21659	3.29466	3.07807	1.60691	7.03275	0.0140659	0.828106
Cebpe	0.763967	-2.27292	-3.03689	0.702975	7.03051	0.0140784	0.828106
Slc12a3	1.03937	1.39787	0.358492	0.430875	7.03024	0.0140799	0.828106
Tac4	0.348476	-1.7907	-2.13918	0.808552	7.00732	0.0142081	0.828106
Cry1	1.08366	-0.0110224	-1.09468	5.04515	6.9915	0.0142973	0.828106
Adam32	1.33502	3.003	1.66798	-4.68159	6.97153	0.014411	0.828106
Cfc1	-2.08211	-1.5192	0.562911	-5.41057	6.96565	0.0144447	0.828106
Otogl	-1.61143	-0.088882	1.52255	-1.19247	6.95555	0.0145027	0.828106
Mtnr1a	-1.02694	-2.32981	-1.30288	-4.02211	6.93705	0.0146099	0.828106
Gucy2g	2.80059	3.35396	0.553371	-1.84383	6.93686	0.014611	0.828106
Gpr17	0.69964	2.3887	1.68906	-1.46639	6.92787	0.0146634	0.828106
Alpl	-1.25276	-0.855167	0.397592	2.87478	6.92137	0.0147014	0.828106
Gpcpd1	0.551297	1.29436	0.743067	5.42541	6.91467	0.0147408	0.828106
Dusp27	-2.01724	-0.431832	1.58541	-0.452737	6.90515	0.0147968	0.828106
Klhdc9	-0.732977	0.591315	1.32429	0.457035	6.88918	0.0148916	0.828106
Nat8f4	1.73481	1.49559	-0.239219	-2.57446	6.88652	0.0149074	0.828106
Tnip1	0.768006	1.0194	0.251392	7.785	6.88349	0.0149255	0.828106
Sult1b1	1.352	0.958009	-0.393989	5.16193	6.86543	0.0150338	0.828106
Zglp1	0.8037	-0.795269	-1.59897	-1.07045	6.86067	0.0150625	0.828106
Moxd2	1.20389	2.02537	0.821481	-2.18147	6.84148	0.0151789	0.828106
Fabp2	1.75014	2.26361	0.513477	8.49211	6.81195	0.0153601	0.828106
Dppa3	-2.47907	-1.72896	0.750104	-5.21464	6.80476	0.0154047	0.828106
Alox12	-0.802226	-1.28759	-0.485362	0.965173	6.78965	0.0154987	0.828106
Krt15	2.11	1.99002	-0.119979	-2.3928	6.78073	0.0155546	0.828106
Slc15a1	1.8036	3.05302	1.24942	7.05731	6.77445	0.0155941	0.828106
Klhl38	-1.72895	-0.87961	0.849339	0.0746733	6.77272	0.015605	0.828106
Tssk5	2.51105	2.98593	0.474879	-3.10451	6.75698	0.0157046	0.828106
Sorbs2	-1.18818	-0.115451	1.07273	5.41723	6.73773	0.0158275	0.828106
LOC103689961	-0.0822835	1.44439	1.52668	-1.40221	6.73637	0.0158362	0.828106
Kiss1	0.850277	1.17152	0.321242	1.31748	6.73132	0.0158686	0.828106
Lrrc23	0.805122	3.65799	2.85286	-4.56815	6.72302	0.0159221	0.828106
Gif	-2.53465	-2.93408	-0.399426	-2.64756	6.71143	0.0159972	0.828106
LOC691083	2.48908	3.30308	0.813996	0.725647	6.70756	0.0160223	0.828106
Zc3h12a	-0.19499	1.08581	1.2808	5.15208	6.70375	0.0160472	0.828106
Lin28a	2.34717	2.78173	0.434554	-3.41012	6.70025	0.01607	0.828106
Rbm46	-0.112738	-1.76859	-1.65585	-0.642805	6.69195	0.0161243	0.828106
Bmp8b	2.03842	2.97791	0.939484	-0.48355	6.67248	0.0162526	0.828106
LOC685699	-1.91241	1.25938	3.1718	-3.11049	6.66488	0.0163031	0.828106
Hba1	1.44938	-0.0758854	-1.52527	8.23543	6.65968	0.0163377	0.828106
S100a8	4.54485	1.33	-3.21485	-1.89574	6.64269	0.0164514	0.828106
Mir23b	0.0721665	2.76149	2.68933	-3.6169	6.63567	0.0164987	0.828106
Fabp12	-2.66439	-1.73108	0.93331	-4.56386	6.62934	0.0165414	0.828106
Trpm8	3.55778	1.77995	-1.77783	-2.91648	6.62905	0.0165434	0.828106
Erich4	1.45208	1.15544	-0.296638	3.71724	6.62373	0.0165794	0.828106
Tspan18	-1.32154	-0.162244	1.15929	4.0499	6.62281	0.0165857	0.828106
Tmem232	0.809567	2.91434	2.10478	-4.87249	6.58026	0.0168776	0.828106
Sim1	-0.416638	-2.31952	-1.90288	-0.592681	6.57535	0.0169117	0.828106
Plekhs1	3.00111	3.59337	0.592263	-2.89358	6.57419	0.0169198	0.828106
Cd209f	2.86643	0.976694	-1.88973	-5.03808	6.55534	0.0170515	0.828106
LOC100361018	-0.592998	-2.08803	-1.49503	-1.60196	6.55163	0.0170775	0.828106
Chdh	1.47021	1.47984	0.00963072	6.70288	6.53037	0.0172279	0.828106
Aldh3a2	1.1323	0.509937	-0.622367	8.0188	6.52641	0.017256	0.828106
Upp1	1.0799	0.0057447	-1.07415	7.00835	6.51379	0.0173462	0.828106
Abhd3	0.83897	1.78269	0.943724	3.69155	6.49724	0.0174654	0.828106
Acsl5	1.40743	1.60632	0.19889	8.55562	6.47922	0.0175963	0.828106
Pklr	1.258	0.0653406	-1.19266	7.4157	6.47133	0.0176539	0.828106
Clip3	-0.750486	-2.64471	-1.89422	0.0170678	6.47105	0.017656	0.828106
Cntn2	-1.13586	0.267962	1.40383	0.317454	6.45122	0.017802	0.828106
LOC100910838	0.992777	1.4039	0.411122	1.419	6.44663	0.0178359	0.828106
Htr5b	-1.02054	2.26136	3.2819	-4.09686	6.43929	0.0178905	0.828106
Aplp1	-0.30121	1.45812	1.75933	4.66691	6.43784	0.0179013	0.828106
Chrdl1	-1.23229	-0.41383	0.818463	3.91835	6.41326	0.0180856	0.828106
Slc2a9	0.768789	1.44389	0.675099	4.79926	6.40962	0.018113	0.828106
Acoxl	-0.174209	1.64596	1.82017	-0.685748	6.39763	0.0182039	0.828106
Ahcyl2	1.13594	1.09633	-0.0396111	7.63897	6.38275	0.0183175	0.828106
Slc29a4	-1.36216	-0.698383	0.663777	0.315577	6.37429	0.0183824	0.828106
Slc2a12	-1.17714	0.32282	1.49996	1.16177	6.37001	0.0184154	0.828106
Iyd	3.02463	1.64176	-1.38287	-0.548921	6.35047	0.0185668	0.828106
Tnfrsf17	-1.184	-2.00738	-0.823373	1.06569	6.34996	0.0185708	0.828106
Chn1	-1.03151	-0.339154	0.692351	2.30322	6.34958	0.0185738	0.828106
Plin1	3.29302	-2.65619	-5.94921	-2.71725	6.34148	0.018637	0.828106
Ccnj	-0.986952	1.75977	2.74672	-1.23501	6.34126	0.0186387	0.828106
NEWGENE_1306399	-0.986952	1.75977	2.74672	-1.23501	6.34126	0.0186387	0.828106
Ppp2r2b	-1.1708	-0.338503	0.832298	0.518739	6.32105	0.0187977	0.828106
Lypd6	-2.71623	0.347664	3.06389	-2.26835	6.31348	0.0188576	0.828106
Gramd2	1.02156	0.445161	-0.5764	2.05955	6.29238	0.019026	0.828106
Dusp14l1	-1.7951	-0.832704	0.962392	-5.33688	6.28974	0.0190472	0.828106
Treml4	1.67734	0.401178	-1.27616	0.989686	6.28362	0.0190964	0.828106
Klf8	-2.28556	-1.78982	0.495737	-4.31951	6.28238	0.0191065	0.828106
LOC690276	-1.49387	-1.18604	0.307831	-1.02845	6.26484	0.0192485	0.828106
Adgrb2	-1.31058	-0.181365	1.12922	2.35496	6.26241	0.0192683	0.828106
Lamb3	-0.451763	1.64664	2.0984	1.47915	6.25594	0.0193212	0.828106
Plxnb3	-1.61548	-0.111964	1.50352	0.645491	6.24993	0.0193704	0.828106
Capn6	-2.22456	-0.295085	1.92948	-1.07993	6.24535	0.0194079	0.828106
Lpin2	0.435267	1.3166	0.881332	5.77839	6.22415	0.0195832	0.828106
LOC100910401	1.61986	0.601132	-1.01873	-5.56907	6.19737	0.0198072	0.828106
Pabpc1l	1.61986	0.601132	-1.01873	-5.56907	6.19737	0.0198072	0.828106
Csrnp1	0.306554	1.44868	1.14213	5.33448	6.18269	0.0199315	0.828106
Ankrd6	-1.08639	-0.134759	0.951635	1.93505	6.17616	0.019987	0.828106
Calb1	-0.294686	-1.2766	-0.981915	-0.305086	6.17141	0.0200275	0.828106
Mfsd2a	1.35892	1.05965	-0.299276	5.06518	6.15537	0.020165	0.828106
LOC103692716	0.690784	-0.549725	-1.24051	0.754742	6.14875	0.0202221	0.828106
Cyp4f18	0.0663781	-1.0006	-1.06698	1.77349	6.14764	0.0202318	0.828106
Nfkbia	-0.920389	0.136517	1.05691	6.86892	6.14572	0.0202484	0.828106
Mir142	-0.493484	1.68252	2.17601	-1.20525	6.14541	0.0202511	0.828106
Serp2	-0.520242	0.579806	1.10005	-0.83453	6.14084	0.0202907	0.828106
Slc26a6	1.03023	0.866712	-0.163521	7.71354	6.13667	0.0203269	0.828106
Bcar3	0.276018	1.44832	1.1723	4.67118	6.13053	0.0203803	0.828106
Fam198b	-1.02207	-0.567696	0.454369	3.45477	6.12105	0.0204633	0.828106
Rgn	0.164161	-1.1095	-1.27366	1.97489	6.10099	0.0206401	0.828106
Adam22	1.69864	0.465859	-1.23278	-0.609437	6.10015	0.0206476	0.828106
Camk2b	0.674978	1.06014	0.385161	6.63873	6.09979	0.0206507	0.828106
Acot11	0.862622	1.27394	0.411321	3.79544	6.09748	0.0206712	0.828106
Tnnc2	0.963311	2.41689	1.45358	-1.5846	6.09217	0.0207184	0.828106
Enkur	-1.95084	0.638483	2.58932	-1.3555	6.08632	0.0207705	0.828106
Cnksr1	0.743867	1.2367	0.492831	4.34769	6.0635	0.0209755	0.828106
Neurod4	0.85477	1.56113	0.706356	-3.59503	6.04359	0.0211564	0.828106
Sema6c	-0.786972	0.667264	1.45424	3.18606	6.04313	0.0211606	0.828106
Bdkrb1	2.30351	1.05778	-1.24574	0.13609	6.0312	0.0212698	0.828106
Stum	-1.23133	-0.346677	0.884651	2.19462	6.02481	0.0213287	0.828106
Kirrel2	-1.88693	1.10017	2.9871	-1.41236	6.00382	0.0215233	0.828106
Vsig4	-2.31983	-1.89088	0.428944	-2.43973	6.0011	0.0215487	0.828106
Lrrc10b	-1.81389	-0.222622	1.59127	0.976715	5.98942	0.0216581	0.828106
B3gnt3	1.15134	0.938257	-0.21308	1.70499	5.98749	0.0216762	0.828106
Idh1	1.0699	0.425557	-0.644343	8.78331	5.98469	0.0217026	0.828106
Bst1	1.83845	1.8494	0.0109507	5.11016	5.9706	0.0218358	0.828106
Adamtsl5	1.12013	1.83177	0.711641	2.036	5.97053	0.0218364	0.828106
Rpl3l	-1.96417	0.175644	2.13981	-1.20469	5.96255	0.0219123	0.828106
LOC100909776	-1.59753	-0.533824	1.0637	-0.752504	5.95733	0.0219622	0.828106
Nkx6-3	-2.32087	-0.980745	1.34012	-5.01988	5.93595	0.0221676	0.828106
Tmem86a	1.05195	1.23969	0.187736	7.72881	5.90752	0.0224444	0.828106
Aldob	1.72927	0.072825	-1.65645	10.023	5.90346	0.0224844	0.828106
RGD1565767	0.307392	-1.62251	-1.9299	-3.83553	5.89749	0.0225431	0.828106
Alox15	3.35972	0.64741	-2.71231	1.22318	5.8775	0.0227413	0.828106
Dnah8	-1.59671	-2.74964	-1.15294	-0.330293	5.87091	0.0228072	0.828106
Syt15	-1.06139	-0.0508383	1.01056	1.9718	5.8657	0.0228594	0.828106
Spata20	-2.30881	0.00120725	2.31001	-3.33704	5.85431	0.0229741	0.828106
Patl2	-2.25626	0.985584	3.24184	-2.59524	5.82179	0.0233052	0.828106
Smim5	-0.925663	0.588234	1.5139	0.612101	5.80991	0.0234275	0.828106
Adam3a	2.32274	2.34767	0.0249236	-3.08602	5.80531	0.0234752	0.828106
Mme	2.05671	2.56642	0.509715	6.88214	5.79995	0.0235308	0.828106
Acadm	1.06817	1.0278	-0.0403737	7.14332	5.78167	0.0237218	0.828106
Tmem158	-1.02333	-1.29587	-0.272537	3.88882	5.78163	0.0237222	0.828106
Atp2b4	-1.32794	-0.179299	1.14865	7.23967	5.77757	0.0237648	0.828106
Epb41l3	1.28426	1.31262	0.0283522	7.56445	5.77466	0.0237954	0.828106
LOC689065	1.63225	2.27344	0.641185	4.89372	5.77361	0.0238065	0.828106
Slc6a8	0.976504	1.75185	0.775347	7.72132	5.75624	0.0239905	0.828106
Gprc5c	-0.891598	0.168502	1.0601	3.34366	5.75255	0.0240298	0.828106
Nrep	-1.05057	-0.621344	0.429223	2.84142	5.75129	0.0240433	0.828106
Plekhb1	-1.03351	-0.109136	0.924378	3.08584	5.74919	0.0240657	0.828106
Tldc2	1.00984	0.930215	-0.0796271	4.129	5.74907	0.024067	0.828106
Gjb5	-1.92388	1.07559	2.99946	-3.02392	5.7457	0.024103	0.828106
Syt2	-2.32295	-0.604616	1.71833	-1.20576	5.72615	0.0243133	0.828106
Sptbn2	-0.627176	0.407357	1.03453	0.704703	5.71266	0.0244598	0.828106
Tmem37	1.62092	1.91013	0.289211	3.87781	5.68134	0.0248039	0.828106
Areg	2.94329	1.38044	-1.56284	1.03555	5.66804	0.0249518	0.828106
Nup62cl	-1.02745	0.526878	1.55433	-5.33688	5.66012	0.0250405	0.828106
Lrrc3b	-2.17782	-1.09546	1.08236	-0.732719	5.65922	0.0250506	0.828106
Gpr162	-1.19245	-0.568278	0.624168	1.93737	5.65011	0.025153	0.828106
Reg1a	1.16994	1.55084	0.380909	5.7001	5.63555	0.0253177	0.828106
Stra6	-1.6023	1.0368	2.6391	0.913715	5.63482	0.0253261	0.828106
LOC498236	2.13284	1.64169	-0.491148	-1.33347	5.63151	0.0253638	0.828106
Prrt4	-1.56858	1.19023	2.7588	-3.10617	5.63068	0.0253732	0.828106
Slit2	-1.67378	0.00556647	1.67934	2.72516	5.61385	0.0255658	0.828106
Loxl4	0.806404	-0.350112	-1.15652	2.33811	5.61213	0.0255855	0.828106
LOC289035	1.61986	0.997553	-0.62231	-5.41057	5.6057	0.0256597	0.828106
LOC103693384	0.565242	1.59014	1.0249	-5.49537	5.60498	0.025668	0.828106
LOC103693823	0.565242	1.59014	1.0249	-5.49537	5.60498	0.025668	0.828106
F13b	-0.337845	-1.73659	-1.39875	-1.23866	5.59639	0.0257675	0.828106
Ppp1r42	-2.14042	-1.85837	0.282054	-4.45146	5.58716	0.025875	0.828106
Spata17	-1.45139	-2.18364	-0.732247	-4.81944	5.57811	0.0259808	0.828106
Fcer1a	-0.230911	-1.59467	-1.36376	0.681897	5.56621	0.0261207	0.828106
Tagln	-0.963214	0.166959	1.13017	10.096	5.52167	0.026653	0.828106
Cyp2d4	1.25275	1.59411	0.341358	4.614	5.51994	0.0266739	0.828106
Ntm	-1.78123	0.298253	2.07948	0.691511	5.5121	0.0267691	0.828106
Colca2	-1.44861	-0.105918	1.34269	-0.643367	5.47703	0.0271997	0.828106
Cyp2d5	1.34088	3.66825	2.32737	-0.0749927	5.45774	0.0274401	0.828106
Tigd5	0.0558498	-0.962144	-1.01799	1.09619	5.44619	0.0275855	0.828106
Cyp2d1	1.21177	2.45331	1.24155	2.70236	5.42731	0.0278248	0.828106
Cyp2d3	1.21177	2.45331	1.24155	2.70236	5.42731	0.0278248	0.828106
Lca5l	-0.485457	1.68739	2.17284	-5.25208	5.42281	0.0278822	0.828106
Prss35	2.65532	4.20544	1.55013	1.09568	5.41681	0.0279591	0.828106
Gpat3	1.41622	1.67135	0.255135	5.01142	5.41092	0.0280347	0.828106
C3	-0.781256	1.78742	2.56868	2.79244	5.38699	0.0283446	0.828106
Cyp3a9	2.87507	2.66883	-0.206241	6.43055	5.37699	0.0284754	0.828106
Wfdc3	1.02612	0.517058	-0.509059	2.42671	5.36881	0.0285828	0.828106
Foxh1	-0.806808	1.42208	2.22889	-3.53556	5.36176	0.0286759	0.828106
Cacng6	-1.88589	-1.35994	0.525955	-0.224705	5.36101	0.0286858	0.828106
LOC500684	0.327951	1.05962	0.731672	0.338039	5.35149	0.0288121	0.828106
Pdzk1	1.43597	2.14806	0.712095	5.9258	5.33433	0.0290414	0.828106
Dact3	-1.45636	-0.272336	1.18403	5.8775	5.3254	0.0291616	0.828106
Socs1	-0.662185	1.16364	1.82583	2.80401	5.32539	0.0291618	0.828106
Usp2	1.34358	1.66263	0.319051	3.5749	5.31284	0.0293317	0.828106
Rfk	0.773642	1.09223	0.318588	6.09432	5.30404	0.0294517	0.828106
Wfdc2	-0.885834	-1.83559	-0.949758	1.67247	5.26575	0.0299805	0.828106
Pex11a	0.780088	1.44076	0.660673	3.82658	5.26362	0.0300102	0.828106
Srl	-0.29041	-1.12622	-0.835805	1.4832	5.249	0.0302155	0.828106
Sbp	2.0461	0.136407	-1.90969	-4.57614	5.24546	0.0302653	0.828106
RGD1564606	0.374306	1.23138	0.857075	4.58964	5.24494	0.0302727	0.828106
Slc19a3	3.81832	4.21385	0.395535	-0.234429	5.24488	0.0302735	0.828106
Uox	-1.10823	1.98117	3.0894	-3.62031	5.24341	0.0302943	0.828106
LOC498424	1.83859	1.55355	-0.285042	-2.63216	5.22276	0.030588	0.828106
Fam151a	0.580224	1.06405	0.483827	4.53774	5.21444	0.0307072	0.828106
Mzb1	-1.11194	-1.83284	-0.720907	4.91026	5.21373	0.0307175	0.828106
Krba1	-0.595948	0.533715	1.12966	2.8178	5.21045	0.0307647	0.828106
Col19a1	-1.27321	-2.52719	-1.25398	-4.16604	5.20294	0.0308731	0.828106
Mcpt3	-1.13428	2.86709	4.00137	-3.00517	5.20087	0.030903	0.828106
Mcpt4	-1.13428	2.86709	4.00137	-3.00517	5.20087	0.030903	0.828106
Mcpt4l1	-1.13428	2.86709	4.00137	-3.00517	5.20087	0.030903	0.828106
Cdh22	-2.44251	0.565386	3.0079	-2.72703	5.19565	0.0309787	0.828106
Amn	2.3358	3.26702	0.931211	4.34561	5.19367	0.0310076	0.828106
Ache	-0.833396	0.321753	1.15515	3.03846	5.19167	0.0310367	0.828106
Ly75	1.07746	0.275485	-0.801976	6.31802	5.17162	0.0313304	0.828106
Scn4b	-0.0176001	1.40795	1.42555	-1.87268	5.1609	0.0314888	0.828106
Sez6	-1.48201	-0.176202	1.30581	0.588693	5.15468	0.0315811	0.828106
Naprt	1.00137	0.692391	-0.308975	6.94365	5.15109	0.0316344	0.828106
Gdf9	1.5815	1.72568	0.144178	-4.60024	5.15042	0.0316445	0.828106
Snai3	-2.54115	-0.0193459	2.52181	-3.2613	5.14427	0.0317363	0.828106
Snhg11	-1.79521	-0.236942	1.55827	1.71529	5.13668	0.0318502	0.828106
Cyp27a1	1.07926	0.619524	-0.459731	4.37617	5.12646	0.0320042	0.828106
Tnfrsf19	-1.69599	-0.575362	1.12063	0.815201	5.11176	0.0322273	0.828106
Megf10	-0.783334	0.314006	1.09734	0.763191	5.10485	0.0323328	0.828106
Got1l1	-2.70911	-0.388018	2.32109	-3.73686	5.10369	0.0323507	0.828106
Kcnma1	-1.24597	-0.465031	0.780939	4.20058	5.09707	0.0324522	0.828106
Magee2	-0.483426	-1.04431	-0.560887	-2.44291	5.08234	0.0326796	0.828106
Slc23a1	1.31561	1.38779	0.0721791	4.60685	5.07853	0.0327387	0.828106
Knop1	1.8162	0.991969	-0.82423	-0.930174	5.07157	0.0328471	0.828106
RGD1307603	-1.10414	2.50888	3.61302	-3.41386	5.06312	0.0329794	0.828106
Samd8	1.05259	1.22291	0.170325	5.35713	5.05391	0.0331241	0.828106
Snai1	-0.46836	-1.2011	-0.732737	3.06105	5.05131	0.0331651	0.828106
Gh1	0.0351615	1.56635	1.53119	-5.65387	5.04967	0.033191	0.828106
Tmem211	0.0351615	1.56635	1.53119	-5.65387	5.04967	0.033191	0.828106
Fmod	-1.56341	-0.358624	1.20478	4.37699	5.04372	0.0332852	0.828106
Pcdh12	-0.235622	-1.15941	-0.923791	3.39259	5.03986	0.0333464	0.828106
Fam214b	0.614633	1.16756	0.552929	5.0368	5.03726	0.0333879	0.828106
RGD1565212	0.0351615	2.03468	1.99951	-5.46642	5.03031	0.0334987	0.828106
Noct	0.817308	2.34294	1.52563	3.42297	5.02223	0.0336281	0.828106
LOC102552988	0.708108	-2.23211	-2.94022	0.0099829	5.02065	0.0336535	0.828106
Pdia5	-1.96349	-0.498224	1.46526	3.87389	5.01962	0.03367	0.828106
Cldn24	-2.80347	-2.85029	-0.046817	-4.6514	5.0172	0.0337089	0.828106
Ndufa4l2	-1.2428	-0.175506	1.0673	1.12084	5.01469	0.0337493	0.828106
Wdr63	-0.210851	1.96697	2.17782	-4.78769	5.00334	0.0339331	0.828106
Iqcf1	-0.221089	2.86216	3.08325	-3.36969	5.00032	0.033982	0.828106
Nt5c1a	-0.935125	0.25595	1.19107	-1.92999	4.999	0.0340035	0.828106
Sec16b	0.908799	1.0899	0.181103	5.78551	4.99863	0.0340096	0.828106
Mir339	0.0316904	1.8275	1.79581	-5.01988	4.99506	0.0340678	0.828106
Mapk4	-1.59846	0.0207732	1.61923	2.006	4.99117	0.0341313	0.828106
Gjc3	0.781923	-1.18129	-1.96321	-3.76485	4.9827	0.0342701	0.828106
Tcf21	-0.0519028	-1.09153	-1.03963	5.87037	4.98083	0.0343008	0.828106
Cyp2j4	1.97705	1.43213	-0.544928	5.45004	4.97829	0.0343427	0.828106
Tp63	0.19662	-2.48994	-2.68656	-3.26707	4.97428	0.0344088	0.828106
Lrrc17	-1.92311	-0.231417	1.6917	-1.13005	4.97377	0.0344172	0.828106
Bend5	-1.48088	0.537326	2.01821	1.97793	4.97335	0.0344241	0.828106
Dapl1	1.23344	-0.889214	-2.12265	-3.82145	4.97306	0.0344289	0.828106
Ccr3	0.0607639	-2.852	-2.91277	0.553394	4.96997	0.03448	0.828106
Tubb1	-0.0455313	2.51736	2.56289	-4.15144	4.96913	0.034494	0.828106
Nkx1-2	-1.23051	-1.39457	-0.164061	1.84076	4.96289	0.0345975	0.828106
Nppc	-0.836269	-1.85162	-1.01535	-1.09775	4.96091	0.0346304	0.828106
Alpp	3.45614	1.91321	-1.54293	-0.877235	4.95282	0.0347653	0.828106
Igfals	-2.11156	0.888045	2.99961	-3.1108	4.94529	0.0348915	0.828106
Tmem45b	1.71548	2.95661	1.24114	5.15784	4.9212	0.035299	0.828106
Trim58	2.92937	2.0403	-0.889074	-3.01174	4.91858	0.0353435	0.828106
Tspan2	-1.07227	-0.206345	0.865921	5.21129	4.91828	0.0353486	0.828106
Cmtm2a	0.560897	2.22955	1.66865	-5.24512	4.91764	0.0353595	0.828106
Mir193a	0.0430928	1.63128	1.58819	-5.10468	4.91588	0.0353897	0.828106
Grin2a	-1.43563	-0.417437	1.01819	-1.62422	4.90338	0.0356039	0.828106
RGD1564899	-2.05181	0.866744	2.91855	-1.35723	4.89501	0.0357485	0.828106
Car4	0.987916	1.62801	0.640091	6.0225	4.89176	0.0358047	0.828106
Ccdc116	-1.7192	0.930746	2.64994	-3.91131	4.87559	0.0360863	0.828106
Tnfaip2	1.26946	0.975023	-0.29444	4.12419	4.87415	0.0361114	0.828106
Panx2	-2.11891	0.0404745	2.15938	-0.687479	4.87261	0.0361385	0.828106
Nxph4	-0.638585	0.954864	1.59345	0.0571347	4.87219	0.0361458	0.828106
LOC500948	1.95059	2.34584	0.395252	-3.61083	4.87199	0.0361493	0.828106
Slc27a5	-0.227138	-3.24313	-3.01599	0.258807	4.87168	0.0361547	0.828106
Aph1b	-0.65857	0.430996	1.08957	1.42185	4.87166	0.0361552	0.828106
LOC108348064	-0.65857	0.430996	1.08957	1.42185	4.87166	0.0361552	0.828106
LOC691658	-0.65857	0.430996	1.08957	1.42185	4.87166	0.0361552	0.828106
Mamdc2	-1.42736	-0.957547	0.46981	3.89277	4.86476	0.0362764	0.828106
Paqr7	0.979878	1.09157	0.111696	5.29043	4.85444	0.0364585	0.828106
Gpd1	1.53683	0.666508	-0.870325	8.27189	4.84168	0.0366855	0.828106
RGD1561102	-1.95238	0.399063	2.35144	-2.97453	4.83093	0.0368779	0.828106
Mall	1.08343	1.28792	0.204498	6.52197	4.82802	0.0369303	0.828106
Ifi44	-0.837679	0.321043	1.15872	3.23963	4.8206	0.0370642	0.828106
Gpr81	0.271874	-1.8919	-2.16377	1.24359	4.81902	0.0370928	0.828106
Scrn1	-1.07545	-0.316249	0.759206	2.64552	4.81891	0.0370947	0.828106
Hist1h4m	-0.664516	1.18418	1.84869	-2.42671	4.81812	0.037109	0.828106
Nrsn2	-3.26477	-1.10217	2.1626	-2.93804	4.8137	0.0371892	0.828106
Slc5a11	1.5191	1.59836	0.0792588	4.2332	4.81185	0.0372228	0.828106
Ptprz1	-1.32296	-0.566235	0.756721	0.432547	4.8102	0.0372527	0.828106
Mustn1	-1.01519	-0.338918	0.676275	3.76656	4.80873	0.0372795	0.828106
Plin2	1.16802	-0.0290425	-1.19706	6.82431	4.80314	0.0373815	0.828106
Mir1b	0.560897	1.58835	1.02746	-5.49537	4.80109	0.0374188	0.828106
Lims2	-1.08057	-0.27328	0.807294	5.2271	4.80004	0.0374381	0.828106
Ezr	0.819867	1.02422	0.20435	8.74394	4.79386	0.0375513	0.828106
Lpar4	-1.77449	1.12097	2.89547	-2.34169	4.79254	0.0375757	0.828106
Ccdc173	-2.29966	-1.11184	1.18782	-1.72168	4.78332	0.0377455	0.828106
Lgals4	1.01917	0.559059	-0.460116	10.777	4.77984	0.03781	0.828106
Rfx2	-1.20898	-0.423887	0.785089	2.74073	4.7755	0.0378903	0.828106
Moxd1	-1.16834	-0.0373471	1.13099	1.89831	4.77385	0.037921	0.828106
Ciart	0.220902	1.83942	1.61851	2.00531	4.76563	0.0380741	0.828106
Il10	0.158473	2.63621	2.47774	-2.95872	4.76269	0.0381292	0.828106
LOC100361556	0.0351615	3.38762	3.35246	-4.93978	4.75904	0.0381974	0.828106
LOC100910656	0.0351615	3.38762	3.35246	-4.93978	4.75904	0.0381974	0.828106
Sord	-0.538717	0.549531	1.08825	4.29557	4.75379	0.0382961	0.828106
Il1r2	2.12216	0.902131	-1.22003	0.382538	4.74742	0.0384162	0.828106
Exoc3l4	1.31477	1.06134	-0.253426	5.24291	4.74735	0.0384175	0.828106
RGD1310507	0.13329	1.00879	0.875497	-0.782795	4.74355	0.0384894	0.828106
Clec2e	2.51839	4.21466	1.69627	3.99855	4.73282	0.0386929	0.828106
Hist1h1d	-1.90108	0.798482	2.69957	-0.716281	4.73188	0.0387109	0.828106
RGD1305645	-2.1467	-0.23886	1.90784	0.730222	4.72025	0.0389333	0.828106
Ncan	-0.231776	-2.11322	-1.88145	-1.43502	4.71478	0.0390384	0.828106
Unc5a	-1.18026	-0.843018	0.337241	0.1334	4.70958	0.0391387	0.828106
Arhgap44	-1.38568	-0.184593	1.20109	1.14249	4.70909	0.0391482	0.828106
Arhgef33	-0.789586	0.298284	1.08787	0.514732	4.70814	0.0391666	0.828106
Bdnf	1.18953	1.79869	0.609163	-3.39714	4.70442	0.0392387	0.828106
Hmx2	-1.01389	-1.6423	-0.628418	-0.399225	4.7044	0.0392388	0.828106
Rab38	-1.64677	-0.611352	1.03542	-0.864445	4.70425	0.0392419	0.828106
B4galt6	0.739956	1.1143	0.374343	6.09845	4.69741	0.0393747	0.828106
St18	-1.11654	-1.30452	-0.187981	0.393828	4.67894	0.0397361	0.828106
Abhd4	0.651934	1.0493	0.397364	6.09907	4.67734	0.0397675	0.828106
Pygm	-1.72679	-0.577139	1.14965	3.51494	4.66455	0.0400203	0.828106
Il4r	0.382867	1.11882	0.735952	7.23915	4.66363	0.0400387	0.828106
Steap4	0.775406	1.33476	0.559349	1.60071	4.65874	0.0401358	0.828106
Sun3	1.5246	0.343441	-1.18116	-2.52992	4.65831	0.0401445	0.828106
Tsacc	-0.210851	1.62227	1.83312	-4.9339	4.64274	0.0404561	0.828106
LOC102551716	-1.80947	-0.0662676	1.7432	-5.01988	4.64046	0.040502	0.828106
Ube2q2l	0.339845	-0.762107	-1.10195	2.8909	4.63789	0.0405538	0.828106
Orm1	0.942773	3.58606	2.64329	-3.78751	4.63697	0.0405724	0.828106
Tmem95	-0.727175	1.20329	1.93046	-5.26318	4.62959	0.0407215	0.828106
Tex52	-1.1562	0.405279	1.56148	-0.119782	4.61612	0.0409956	0.828106
Fxyd6	-1.46334	0.195579	1.65892	4.6969	4.61416	0.0410359	0.828106
Gba3	-1.79631	-1.04449	0.751819	-5.42167	4.60778	0.0411665	0.828106
Cyp4f39	2.53542	2.18012	-0.355301	-2.21356	4.60281	0.0412689	0.828106
Zfp2	-0.0718791	-1.12385	-1.05197	0.681819	4.59922	0.0413429	0.828106
Mt1	1.1084	1.09652	-0.0118813	4.82674	4.59241	0.0414837	0.828106
RGD1304770	1.73086	1.4859	-0.244955	4.23894	4.59158	0.0415009	0.828106
RGD1309110	0.0351615	1.74001	1.70485	-5.58017	4.58698	0.0415965	0.828106
Creb3l3	1.76541	1.16136	-0.604056	8.09594	4.58634	0.0416098	0.828106
Chrna4	-1.89869	0.499739	2.39843	-3.66544	4.58442	0.0416499	0.828106
Lancl3	0.331673	-1.87582	-2.20749	-3.88505	4.58231	0.0416938	0.828106
LOC103690017	1.37911	0.928073	-0.451036	3.00574	4.58134	0.0417141	0.828106
Pbld1	1.02365	0.805827	-0.217823	4.97564	4.57818	0.0417801	0.828106
Fam198a	-2.00316	-0.721688	1.28147	-1.56271	4.57507	0.0418452	0.828106
Pak7	-1.06074	-2.50094	-1.4402	-4.5176	4.57385	0.0418707	0.828106
RGD1359449	-2.43777	0.145477	2.58325	-2.56101	4.56746	0.0420049	0.828106
RGD1564801	-0.135242	-1.28371	-1.14847	-1.21187	4.56664	0.0420222	0.828106
Arhgap26	0.705413	1.06495	0.359535	3.84133	4.56604	0.0420349	0.828106
Bbox1	-1.025	1.56696	2.59196	-3.09088	4.56394	0.0420792	0.828106
LOC100364769	-0.745779	1.4286	2.17438	-4.62919	4.56211	0.0421178	0.828106
Sema3e	-1.3664	-0.241586	1.12482	0.0743423	4.55155	0.0423415	0.828106
Fam170b	-3.29028	-1.92321	1.36707	-4.20212	4.54977	0.0423794	0.828106
Clec7a	-1.91477	1.05889	2.97366	-0.551128	4.54631	0.0424532	0.828106
LOC689230	3.60917	2.9145	-0.69467	-1.6416	4.54624	0.0424546	0.828106
Otop1	2.32583	0.589199	-1.73663	-5.35752	4.54498	0.0424814	0.828106
Rbm11	1.64577	1.17622	-0.469547	-3.26041	4.54236	0.0425375	0.828106
Prmt8	-1.76156	0.310152	2.07171	-0.785736	4.53776	0.042636	0.828106
Hspb8	-1.01785	-0.0712119	0.946642	5.44444	4.53273	0.0427438	0.828106
Scube1	0.705515	-0.42216	-1.12767	5.05303	4.5305	0.0427919	0.828106
Adhfe1	-1.15135	0.0571885	1.20854	0.389246	4.52528	0.0429044	0.828106
Klhl32	-1.14986	-0.527703	0.622157	0.466409	4.52371	0.0429384	0.828106
C1ql3	-1.02996	-1.47456	-0.444605	-1.23747	4.52357	0.0429413	0.828106
Ly6g6d	-2.35971	-1.11439	1.24532	-2.10383	4.52338	0.0429455	0.828106
Slc25a22	1.4242	2.80156	1.37736	1.13171	4.51995	0.0430198	0.828106
Xpnpep2	1.38686	2.08427	0.69741	6.2775	4.51985	0.043022	0.828106
Bambi	0.428263	-0.850844	-1.27911	2.49852	4.50561	0.043332	0.828106
Per2	0.854745	-0.170804	-1.02555	6.39183	4.50455	0.043355	0.828106
LOC100911486	-1.33869	-1.09128	0.247407	1.1793	4.50109	0.0434309	0.828106
Megf6	-1.33869	-1.09128	0.247407	1.1793	4.50109	0.0434309	0.828106
Abcg4	-1.26085	-0.591043	0.669802	4.19656	4.50061	0.0434414	0.828106
Mreg	-1.06774	0.512516	1.58025	1.25242	4.49758	0.043508	0.828106
Coch	0.98248	-1.23642	-2.2189	-0.130009	4.48645	0.0437534	0.828106
Apob	1.92558	2.48688	0.561297	8.64463	4.48603	0.0437625	0.828106
Prr13	0.536986	1.1039	0.566912	6.83553	4.47582	0.0439892	0.828106
Nr1d2	-0.270608	0.808693	1.0793	5.85618	4.47343	0.0440425	0.828106
Terc	-2.28473	-0.408578	1.87615	-0.277763	4.47312	0.0440494	0.828106
Gsdmd	1.36246	1.20903	-0.153427	6.42457	4.47145	0.0440866	0.828106
Cdhr5	1.33418	1.5957	0.261522	8.39919	4.46782	0.0441678	0.828106
Efcab3	0.189795	-2.75902	-2.94881	-2.80645	4.46304	0.044275	0.828106
Fmo5	1.69425	1.79698	0.102732	3.95409	4.45192	0.0445255	0.828106
LOC103694855	3.26673	3.59458	0.327851	-0.494094	4.45057	0.044556	0.828106
Asb14	-0.314554	1.6245	1.93906	-1.20423	4.44688	0.0446395	0.828106
Dusp1	-1.48607	-0.427756	1.05832	6.28712	4.44588	0.0446621	0.828106
Pomp	0.770528	1.03128	0.26075	1.39217	4.44144	0.0447631	0.828106
Vpreb2	0.0351615	1.37902	1.34385	-5.72756	4.44085	0.0447765	0.828106
Slc4a8	-0.422931	0.695703	1.11863	0.308699	4.44055	0.0447833	0.828106
Efhd1	-2.00376	-0.814968	1.18879	0.246424	4.43652	0.044875	0.828106
LOC100911440	1.37328	2.76226	1.38898	1.18633	4.41891	0.045279	0.828106
Mx1	-1.20747	0.485694	1.69316	3.61327	4.41876	0.0452824	0.828106
Slitrk6	-0.416399	-1.46265	-1.04625	3.23064	4.41404	0.0453915	0.828106
Prkcq	-0.456429	0.61093	1.06736	2.96216	4.41398	0.045393	0.828106
Ces2h	1.59096	1.07136	-0.5196	1.31672	4.41263	0.0454242	0.828106
Vegfd	-1.67952	0.856825	2.53635	-1.16006	4.40594	0.0455795	0.828106
Lrrn4	0.354938	3.29771	2.94277	-1.85167	4.40594	0.0455795	0.828106
B3gat1	-2.60551	-0.158985	2.44653	-3.43654	4.39632	0.0458037	0.828106
Tbx18	0.0351615	1.77583	1.74067	-5.56907	4.3886	0.0459848	0.828106
Itga7	-1.01871	-0.21959	0.799122	4.60968	4.38536	0.046061	0.828106
Wnt2b	0.520433	-0.971721	-1.49215	4.19756	4.3731	0.046351	0.828106
Kcne5	-2.24173	-2.07397	0.167759	-1.82584	4.37158	0.046387	0.828106
Hist1h2bk	-0.55268	0.873438	1.42612	0.104319	4.37107	0.0463991	0.828106
Reg3b	0.389621	3.39744	3.00782	8.64113	4.37046	0.0464136	0.828106
Prss57	-1.80808	-1.63836	0.169717	-5.65387	4.37029	0.0464177	0.828106
Bche	1.01785	0.5316	-0.486246	6.28585	4.36826	0.0464659	0.828106
Lrrc31	0.328281	-0.677903	-1.00618	5.11848	4.36572	0.0465265	0.828106
Myh6	-1.48271	-0.137687	1.34502	0.251851	4.36009	0.0466608	0.828106
Tmprss5	-1.37185	-0.629838	0.742014	1.69962	4.33976	0.0471505	0.828106
Ednra	-0.18972	-1.01745	-0.827725	3.92505	4.33752	0.0472047	0.828106
Btnl5	1.67908	2.67697	0.997889	2.53495	4.33645	0.0472307	0.828106
Tmco3	-0.877788	-1.41158	-0.533794	1.28383	4.33074	0.0473696	0.828106
Eno4	-1.26394	-0.402498	0.86144	0.574393	4.33006	0.0473862	0.828106
Abcb1a	0.699266	1.8476	1.14833	5.82793	4.32875	0.0474182	0.828106
Abcb1b	0.699266	1.8476	1.14833	5.82793	4.32875	0.0474182	0.828106
Abcb4	0.699266	1.8476	1.14833	5.82793	4.32875	0.0474182	0.828106
Cxcr2	3.74351	1.19257	-2.55094	-3.5357	4.32553	0.0474968	0.828106
RGD1564463	3.74511	0.556107	-3.18901	-0.770763	4.32255	0.0475698	0.828106
Osbp2	-1.14007	-0.314154	0.825915	0.162726	4.31166	0.0478374	0.828106
Ly6g6e	-1.95404	-1.96292	-0.0088788	-1.62787	4.31082	0.0478581	0.828106
Mdh2	1.01535	0.27278	-0.742574	9.71303	4.30795	0.0479289	0.828106
Cdkn2b	1.13026	0.373111	-0.757148	5.76141	4.30339	0.0480419	0.828106
Trpa1	0.00559641	-1.24118	-1.24678	1.60395	4.30018	0.0481215	0.828106
Cuzd1	-1.8507	-0.943765	0.906936	-3.50023	4.29117	0.048346	0.828106
RGD1561777	1.42636	0.958808	-0.467554	1.48962	4.29049	0.0483629	0.828106
Hist2h2ac	0.0430928	1.66226	1.61917	-5.09358	4.28726	0.0484439	0.828106
Aard	-1.08942	-1.38249	-0.293073	0.993165	4.26816	0.0489249	0.828106
Apoc2	2.20934	2.60137	0.392026	4.55241	4.26705	0.0489532	0.828106
Ms4a4a	2.80873	-0.320777	-3.12951	1.16402	4.25753	0.0491953	0.828106
Arhgef25	-1.04529	-0.0971766	0.948113	5.15706	4.25752	0.0491957	0.828106
LOC103689920	0.85815	1.16951	0.311358	0.757119	4.2506	0.0493726	0.828106
Gstm6l	0.609119	1.18272	0.573599	1.06851	4.2418	0.0495986	0.828106
Igsf21	2.33638	0.854664	-1.48171	-4.72354	4.23484	0.0497786	0.828106
Lipc	0.552978	2.21488	1.6619	-3.9252	4.23423	0.0497943	0.828106
Pcdhgb4	-0.499886	0.508801	1.00869	-0.0710108	4.22842	0.049945	0.828106

## Sheet: gopathway
SYMBOL	GENENAME	ENTREZID	KEGG_Pathway	GO_TERM
Aard	alanine and arginine rich domain containing protein	246323		molecular_function; cellular_component; lung development
Abhd3	abhydrolase domain containing 3	291793		molecular_function; phospholipase A2 activity; cellular_component; biological_process; phospholipase A1 activity; integral component of membrane; lipase activity; short-chain carboxylesterase activity; cellular lipid metabolic process; phosphatidylcholine metabolic process; acylglycerol lipase activity; medium-chain fatty acid biosynthetic process; medium-chain fatty acid catabolic process
Abhd4	abhydrolase domain containing 4	364380		lysophospholipase activity; lipid droplet; carboxylic ester hydrolase activity; lipid homeostasis; N-acylethanolamine metabolic process
Abhd6	abhydrolase domain containing 6	305795		phospholipase activity; mitochondrion; lysosomal membrane; phospholipid catabolic process; integral component of membrane; negative regulation of cell migration; late endosome membrane; AMPA glutamate receptor complex; acylglycerol catabolic process; positive regulation of lipid biosynthetic process; acylglycerol lipase activity; monoacylglycerol catabolic process; long-term synaptic depression; …
Abi3bp	ABI family member 3 binding protein	363767		collagen binding; glycosaminoglycan binding; interstitial matrix; heparin binding; positive regulation of cell-substrate adhesion; extracellular matrix organization; extracellular matrix
Acot11	acyl-CoA thioesterase 11	100363074		fatty-acyl-CoA binding; cytoplasm; mitochondrial matrix; cytosol; acyl-CoA metabolic process; lipid binding; response to temperature stimulus; response to cold; palmitoyl-CoA hydrolase activity; long-chain fatty acyl-CoA binding; acyl-CoA hydrolase activity; long-chain acyl-CoA hydrolase activity; negative regulation of cold-induced thermogenesis; palmitic acid biosynthetic process
Acoxl	acyl-CoA oxidase-like	296138		acyl-CoA oxidase activity; fatty acid binding; peroxisome; fatty acid beta-oxidation using acyl-CoA oxidase; flavin adenine dinucleotide binding; lipid homeostasis; FAD binding
Adam22	ADAM metallopeptidase domain 22	57033		metalloendopeptidase activity; plasma membrane; proteolysis; adult locomotory behavior; Schwann cell differentiation; membrane; integral component of membrane; myelination in peripheral nervous system; axon; gliogenesis; glutamatergic synapse; integral component of postsynaptic density membrane; neurotransmitter receptor localization to postsynaptic specialization membrane
Adam23	ADAM metallopeptidase domain 23	301460		metalloendopeptidase activity; proteolysis; glutamatergic synapse; integral component of presynaptic membrane; cellular response to leukemia inhibitory factor
Adam32	ADAM metallopeptidase domain 32	361170		metalloendopeptidase activity; proteolysis; integral component of membrane
Adam3a	ADAM metallopeptidase domain 3A	57021		molecular_function; metalloendopeptidase activity; cellular_component; plasma membrane; proteolysis; single fertilization; binding of sperm to zona pellucida; male gonad development; fertilization; cell surface; positive regulation of gene expression; integral component of membrane; flagellated sperm motility; protein-containing complex; membrane raft; regulation of mRNA processing; sperm head
Adamts16	ADAM metallopeptidase with thrombospondin type 1 motif, 16	306664		branching involved in ureteric bud morphogenesis; regulation of systemic arterial blood pressure; metalloendopeptidase activity; proteolysis; male gamete generation; regulation of cilium assembly
Adamtsl5	ADAMTS-like 5	314626		microfibril; extracellular region; heparin binding; extracellular matrix
Adgrb2	adhesion G protein-coupled receptor B2	313058		G protein-coupled receptor activity; centrosome; plasma membrane; integral component of plasma membrane; cell surface receptor signaling pathway; G protein-coupled receptor signaling pathway; adenylate cyclase-activating G protein-coupled receptor signaling pathway; peripheral nervous system development; negative regulation of angiogenesis; calcineurin-NFAT signaling cascade; positive regulation …
Adgrf3	adhesion G protein-coupled receptor F3	298857		G protein-coupled receptor activity; cell surface receptor signaling pathway; G protein-coupled receptor signaling pathway; integral component of membrane
Adhfe1	alcohol dehydrogenase, iron containing, 1	362474		molecular_function; alcohol dehydrogenase (NAD) activity; cellular_component; mitochondrion; glutamate catabolic process via 2-oxoglutarate; biological_process; metal ion binding; hydroxyacid-oxoacid transhydrogenase activity; oxidation-reduction process
Adtrp	androgen-dependent TFPI-regulating protein	361228		positive regulation of protein phosphorylation; cell migration involved in sprouting angiogenesis; negative regulation of leukocyte migration; negative regulation of extracellular matrix constituent secretion; plasma membrane; caveola; cell surface; positive regulation of gene expression; membrane; integral component of membrane; hydrolase activity; negative regulation of blood coagulation; long-…
Akr1b10	aldo-keto reductase family 1 member B10	296972		retinoid metabolic process; retinal dehydrogenase activity; alditol:NADP+ 1-oxidoreductase activity; cytosol; alcohol dehydrogenase (NADP+) activity; farnesol catabolic process; retinal binding; polyol metabolic process; retinol metabolic process; retinal metabolic process; daunorubicin metabolic process; doxorubicin metabolic process; geranylgeranyl reductase activity; indanol dehydrogenase acti…
Akr1b8	aldo-keto reductase family 1, member B8	286921		alditol:NADP+ 1-oxidoreductase activity; mitochondrion; cytosol; alcohol dehydrogenase (NADP+) activity; oxidoreductase activity; oxidation-reduction process
Akr1c14	aldo-keto reductase family 1, member C14	191574		alditol:NADP+ 1-oxidoreductase activity; cytosol; prostaglandin metabolic process; alcohol dehydrogenase (NADP+) activity; steroid metabolic process; steroid dehydrogenase activity; oxidoreductase activity; hippocampus development; progesterone metabolic process; daunorubicin metabolic process; doxorubicin metabolic process; androsterone dehydrogenase activity; androsterone dehydrogenase (B-speci…
Akr1c2	aldo-keto reductase family 1, member C2	291283		alditol:NADP+ 1-oxidoreductase activity; steroid binding; cytosol; prostaglandin metabolic process; G protein-coupled receptor signaling pathway; digestion; alcohol dehydrogenase (NADP+) activity; steroid metabolic process; positive regulation of cell proliferation; steroid dehydrogenase activity; oxidoreductase activity; oxidoreductase activity, acting on NAD(P)H, quinone or similar compound as …
Alkal1	ALK and LTK ligand 1	100910984		positive regulation of neuron projection development; receptor signaling protein tyrosine kinase activator activity; receptor tyrosine kinase binding; positive regulation of protein tyrosine kinase activity; positive regulation of ERK1 and ERK2 cascade; positive regulation of ERK5 cascade
Amn	amnion associated transmembrane protein	314459		molecular_function; signaling receptor binding; extracellular space; receptor-mediated endocytosis; excretion; protein localization; biological_process; cobalamin transport; integral component of membrane; apical plasma membrane; endocytic vesicle; brush border membrane; protein-containing complex; Golgi to plasma membrane protein transport; apical part of cell
Ankrd6	ankyrin repeat domain 6	500430		nucleus; cytoplasm; intracellular membrane-bounded organelle; positive regulation of JNK cascade; negative regulation of canonical Wnt signaling pathway; positive regulation of Wnt signaling pathway, planar cell polarity pathway
Aplp1	amyloid beta precursor like protein 1	502317		protein binding; Golgi apparatus; plasma membrane; mRNA polyadenylation; regulation of translation; heparin binding; membrane; integral component of membrane; extracellular matrix organization; forebrain development; alpha-2A adrenergic receptor binding; alpha-2B adrenergic receptor binding; alpha-2C adrenergic receptor binding; identical protein binding; transition metal ion binding; perinuclear…
Apoc2	apolipoprotein C2	292697		molecular_function; cellular_component; extracellular space; lipid metabolic process; lipid binding; positive regulation of phospholipase activity; positive regulation of triglyceride catabolic process; negative regulation of very-low-density lipoprotein particle clearance; phospholipase activator activity; negative regulation of cholesterol transport; cholesterol efflux; phospholipid efflux; ver…
Arhgap26	Rho GTPase activating protein 26	307459		molecular_function; GTPase activator activity; phospholipid binding; cellular_component; signal transduction; biological_process; actin cytoskeleton organization; positive regulation of GTPase activity; regulation of small GTPase mediated signal transduction
Arhgap44	Rho GTPase activating protein 44	303222		GTPase activator activity; phospholipid binding; cytoplasm; exocytosis; signal transduction; postsynaptic density; cell junction; leading edge membrane; regulation of actin cytoskeleton organization; negative regulation of Rac protein signal transduction; regulation of GTPase activity; dendritic spine; positive regulation of GTPase activity; Rac GTPase binding; presynaptic active zone; recycling …
Arhgef25	Rho guanine nucleotide exchange factor 25	314904		Rho guanyl-nucleotide exchange factor activity; plasma membrane; myofibril; sarcomere; regulation of Rho protein signal transduction
Arhgef33	Rho guanine nucleotide exchange factor 33	500608		Rho guanyl-nucleotide exchange factor activity; regulation of Rho protein signal transduction
Armcx6	armadillo repeat containing, X-linked 6	363496		mitochondrial outer membrane; integral component of membrane
Arx	aristaless related homeobox	317268		negative regulation of transcription by RNA polymerase II; RNA polymerase II regulatory region sequence-specific DNA binding; RNA polymerase II distal enhancer sequence-specific DNA binding; DNA-binding transcription factor activity, RNA polymerase II-specific; DNA-binding transcription repressor activity, RNA polymerase II-specific; neuron migration; molecular_function; chromatin binding; nucleu…
Asb14	ankyrin repeat and SOCS box-containing 14	680076		protein ubiquitination; intracellular signal transduction
Asb18	ankyrin repeat and SOCS box-containing 18	316614		protein ubiquitination; intracellular signal transduction
Asic3	acid sensing ion channel subunit 3	286920		cation channel activity; protein binding; plasma membrane; integral component of plasma membrane; cation transport; sodium ion transport; response to heat; response to mechanical stimulus; response to acidic pH; ligand-gated sodium channel activity; ion transmembrane transport; sodium ion transmembrane transport; enterobactin transport; enterobactin transmembrane transporter activity; perinuclear…
Asz1	ankyrin repeat, SAM and basic leucine zipper domain containing 1	170578		cytoplasm; male meiotic nuclear division; spermatogenesis; piRNA metabolic process; DNA methylation involved in gamete generation; pi-body
Bambi	BMP and activin membrane-bound inhibitor	83837		frizzled binding; cytoplasm; plasma membrane; transforming growth factor beta receptor signaling pathway; positive regulation of cell proliferation; regulation of cell shape; positive regulation of epithelial to mesenchymal transition; integral component of membrane; cell migration; negative regulation of transforming growth factor beta receptor signaling pathway; positive regulation of protein b…
Bcar3	BCAR3 adaptor protein, NSP family member	310838		lens morphogenesis in camera-type eye; guanyl-nucleotide exchange factor activity; small GTPase mediated signal transduction; positive regulation of peptidyl-serine phosphorylation
Bche	butyrylcholinesterase	65036		acetylcholinesterase activity; cholinesterase activity; extracellular space; nuclear envelope lumen; endoplasmic reticulum; endoplasmic reticulum lumen; response to nutrient; learning; negative regulation of cell proliferation; neuroblast differentiation; membrane; choline metabolic process; choline binding; response to drug; identical protein binding; response to alkaloid; negative regulation of…
Bean1	brain expressed, associated with NEDD4, 1	361358		integral component of membrane
Bend5	BEN domain containing 5	362564		DNA binding; Golgi apparatus; negative regulation of transcription, DNA-templated
Btnl5	butyrophilin-like 5	686048		signaling receptor binding; external side of plasma membrane; integral component of membrane; regulation of immune response; T cell receptor signaling pathway
C1ql3	complement C1q like 3	680404		extracellular region; collagen trimer; identical protein binding; regulation of synapse organization
Calb1	calbindin 1	83839		vitamin D binding; calcium ion binding; nucleus; cytoplasm; cytosol; learning or memory; short-term memory; long-term memory; locomotory behavior; zinc ion binding; retina layer formation; axon; dendrite; stereocilium; cuticular plate; metanephric part of ureteric bud development; vitamin D metabolic process; neuron projection; neuronal cell body; terminal bouton; dendritic spine; cell body; caly…
Calhm4	calcium homeostasis modulator family member 4	499445		integral component of plasma membrane
Calhm5	calcium homeostasis modulator family member 5	294431		integral component of plasma membrane; ion transport
Capn6	calpain 6	83685		microtubule bundle formation; calcium-dependent cysteine-type endopeptidase activity; cytoplasm; spindle; cytosol; microtubule; spindle microtubule; proteolysis; microtubule binding; perinuclear region of cytoplasm; regulation of cytoskeleton organization
Car4
Cavin4	caveolae associated protein 4	313225		protein binding; cytoplasm; cytosol; plasma membrane; caveola; muscle organ development; regulation of gene expression; Z disc; cell differentiation; regulation of Rho protein signal transduction; sarcolemma; positive regulation of transcription by RNA polymerase II
Ccdc116	coiled-coil domain containing 116	287936		cytoplasm; centrosome
Ccdc173	coiled-coil domain containing 173	311113
Ccdc3	coiled-coil domain containing 3	498795		extracellular region; endoplasmic reticulum; negative regulation of tumor necrosis factor-mediated signaling pathway; positive regulation of fat cell differentiation; positive regulation of lipid biosynthetic process
Ccnj	cyclin J	294053		regulation of cyclin-dependent protein serine/threonine kinase activity; cyclin-dependent protein kinase holoenzyme complex; protein kinase activity; nucleus; cytoplasm; protein phosphorylation; cyclin-dependent protein serine/threonine kinase regulator activity; protein kinase binding; mitotic cell cycle phase transition
Cdh22	cadherin 22	29182		cell morphogenesis; calcium ion binding; plasma membrane; cell-cell adherens junction; cell-cell junction assembly; homophilic cell adhesion via plasma membrane adhesion molecules; brain development; cytoskeletal protein binding; cell surface; integral component of membrane; calcium-dependent cell-cell adhesion via plasma membrane cell adhesion molecules; catenin complex; adherens junction organi…
Cdhr5	cadherin-related family member 5	171554		calcium ion binding; integral component of plasma membrane; clathrin-coated pit; cell adhesion; homophilic cell adhesion via plasma membrane adhesion molecules; beta-catenin binding; integral component of membrane; apical plasma membrane; cell differentiation; brush border membrane; microvillus membrane; regulation of microvillus length; spanning component of plasma membrane; cell adhesion molecu…
Cebpe	CCAAT/enhancer binding protein epsilon	25410		RNA polymerase II proximal promoter sequence-specific DNA binding; DNA-binding transcription activator activity, RNA polymerase II-specific; DNA binding; cellular_component; nucleus; nucleoplasm; phagocytosis; positive regulation of gene expression; myeloid cell differentiation; macrophage differentiation; granulocyte differentiation; cytokine biosynthetic process; defense response to bacterium; …
Cfc1	cripto, FRL-1, cryptic family 1	501121		liver development; heart looping; heart morphogenesis; signaling receptor binding; extracellular region; determination of left/right symmetry; endoderm development; heart development; post-embryonic development; anterior/posterior pattern specification; cell surface; BMP signaling pathway; nodal signaling pathway; nodal binding; spleen development; digestive tract morphogenesis; anatomical struct…
Chn1	chimerin 1	84030		phorbol ester receptor activity; GTPase activator activity; signal transduction; motor neuron axon guidance; intracellular signal transduction; regulation of GTPase activity; positive regulation of GTPase activity; metal ion binding; ephrin receptor binding; ephrin receptor signaling pathway; regulation of axonogenesis; regulation of small GTPase mediated signal transduction
Chrdl1	chordin-like 1	363455		ossification; eye development; cell fate determination; extracellular region; neuron differentiation; negative regulation of BMP signaling pathway; compound eye development
Ciart	circadian associated repressor of transcription	365871		RNA polymerase II distal enhancer sequence-specific DNA binding; nucleus; circadian regulation of gene expression; locomotor rhythm; negative regulation of transcription, DNA-templated; E-box binding
Cldn24	claudin 24	502083		structural molecule activity; bicellular tight junction; integral component of membrane; apical plasma membrane
Clec2e	C-type lectin domain family 2, member E	689853		integral component of membrane; carbohydrate binding
Clec4b2	C-type lectin domain family 4, member B2	450222		cell; integral component of membrane; carbohydrate binding; positive regulation of release of sequestered calcium ion into cytosol
Clip3	CAP-GLY domain containing linker protein 3	308493		positive regulation of protein phosphorylation; trans-Golgi network; plasma membrane; microtubule binding; positive regulation of glucose transmembrane transport; peptidyl-L-cysteine S-palmitoylation; negative regulation of microtubule polymerization; early endosome membrane; trans-Golgi network membrane; ganglioside binding; positive regulation of apoptotic process; membrane biogenesis; membrane…
Cmtm2a	CKLF-like MARVEL transmembrane domain containing 2A	307616		transcription corepressor activity; nucleus; cytoplasm; integral component of membrane; negative regulation of transcription, DNA-templated; regulation of testosterone biosynthetic process
Cnksr1	connector enhancer of kinase suppressor of Ras 1	298545		molecular_function; cellular_component; cell cortex; Ras protein signal transduction; Rho protein signal transduction; biological_process; protein binding, bridging
Cntn6	contactin 6	27256		Notch binding; plasma membrane; cell adhesion; Notch signaling pathway; neuron differentiation; positive regulation of Notch signaling pathway; anchored component of plasma membrane; parallel fiber to Purkinje cell synapse; anchored component of presynaptic membrane
Coch	cochlin	362735		growth plate cartilage chondrocyte morphogenesis; molecular_function; collagen binding; cellular_component; extracellular region; extracellular space; sensory perception of sound; biological_process; regulation of cell shape; extracellular matrix; defense response to bacterium; positive regulation of innate immune response; collagen-containing extracellular matrix
Col19a1	collagen type XIX alpha 1 chain	367236		molecular_function; extracellular matrix structural constituent; cellular_component; extracellular space; skeletal muscle tissue development; biological_process; extracellular matrix organization; extracellular matrix
Colca2	colorectal cancer associated 2	315652		cytoplasm
Commd5	COMM domain containing 5	245974		nucleus; nucleoplasm; cytosol; cell cycle arrest; positive regulation of cell growth; positive regulation of epithelial cell differentiation; proximal tubule morphogenesis
Cspg5	chondroitin sulfate proteoglycan 5	50568		Golgi membrane; protein binding; endoplasmic reticulum membrane; Golgi apparatus; plasma membrane; cytoskeleton organization; cell surface; integral component of membrane; Golgi-associated vesicle membrane; axon regeneration; regulation of growth; modulation of chemical synaptic transmission; glutamatergic synapse; GABA-ergic synapse; integral component of postsynaptic membrane; trans-synaptic si…
Csrnp1	cysteine and serine rich nuclear protein 1	363165		DNA-binding transcription activator activity, RNA polymerase II-specific; DNA-binding transcription factor activity; nucleus; regulation of transcription, DNA-templated; post-embryonic development; sequence-specific DNA binding; positive regulation of transcription by RNA polymerase II; platelet-derived growth factor receptor signaling pathway; skeletal system morphogenesis; roof of mouth develop…
Cttnbp2	cortactin binding protein 2	282587		cell cortex; brain development; synaptic vesicle; SH3 domain binding; dendritic spine; regulation of synapse organization; postsynaptic actin cytoskeleton; glutamatergic synapse; regulation of modification of postsynaptic actin cytoskeleton
Cuzd1	CUB and zona pellucida-like domains 1	117179		female pregnancy; hormone-mediated signaling pathway; integral component of membrane; transport vesicle membrane; trypsinogen activation; zymogen granule; zymogen granule membrane
Cyp4f39	cytochrome P450, family 4, subfamily f, polypeptide 39	299566		monooxygenase activity; iron ion binding; oxidoreductase activity, acting on paired donors, with incorporation or reduction of molecular oxygen; heme binding; oxidation-reduction process
Dact3	dishevelled-binding antagonist of beta-catenin 3	499088		protein kinase C binding; cytoplasm; beta-catenin binding; negative regulation of epithelial to mesenchymal transition; regulation of Wnt signaling pathway; negative regulation of Wnt signaling pathway; negative regulation of cell growth; identical protein binding; protein kinase A binding; delta-catenin binding; negative regulation of canonical Wnt signaling pathway
Dapl1	death associated protein-like 1	362136		negative regulation of autophagy; cellular response to amino acid starvation; death domain binding; apoptotic signaling pathway
Ddx43	DEAD-box helicase 43	682138		RNA binding; helicase activity; ATP binding
Dleu7	deleted in lymphocytic leukemia, 7	290308
Dnah8	dynein, axonemal, heavy chain 8	207117		molecular_function; ATP binding; cellular_component; microtubule-based movement; biological_process; ATP-dependent microtubule motor activity, minus-end-directed; dynein complex; outer dynein arm; outer dynein arm assembly; dynein light chain binding; dynein intermediate chain binding; dynein light intermediate chain binding; sperm principal piece
Dnajb3	DnaJ heat shock protein family (Hsp40) member B3	680216		acrosomal vesicle; cytoplasm; centrosome
Dppa3	developmental pluripotency-associated 3	297576		female pronucleus; male pronucleus; nucleus; cytoplasm; chromatin organization; methylated histone binding; embryonic cleavage; protection of DNA demethylation of female pronucleus; negative regulation of DNA demethylation; regulation of genetic imprinting
Dusp14l1	dual specificity phosphatase 14-like 1	365977		inactivation of MAPK activity; protein tyrosine phosphatase activity; MAP kinase tyrosine/serine/threonine phosphatase activity; peptidyl-tyrosine dephosphorylation
Dusp27	dual specificity phosphatase 27, atypical	498267		protein dephosphorylation; protein tyrosine/serine/threonine phosphatase activity
Efcab3	EF-hand calcium binding domain 3	303589		calcium ion binding
Efhd1	EF-hand domain family, member D1	501181		mitochondrial inner membrane; neuron projection development; calcium ion sensor activity; regulation of cellular hyperosmotic salinity response
Enkur	enkurin, TRPC channel interacting protein	291354		acrosomal vesicle; calmodulin binding; sperm principal piece
Eno4	enolase 4	292138		phosphopyruvate hydratase complex; magnesium ion binding; molecular_function; phosphopyruvate hydratase activity; cellular_component; glycolytic process; biological_process; flagellated sperm motility; cilium organization; protein heterodimerization activity; sperm principal piece
Erich4	glutamate-rich 4	685046
Esr1	estrogen receptor 1	24890		negative regulation of transcription by RNA polymerase II; nuclear chromatin; RNA polymerase II proximal promoter sequence-specific DNA binding; TFIIB-class transcription factor binding; transcription coactivator binding; DNA-binding transcription activator activity, RNA polymerase II-specific; antral ovarian follicle growth; epithelial cell development; osteoblast development; DNA binding; chrom…
Exoc3l4	exocyst complex component 3-like 4	299338		exocyst; SNARE binding; exocytosis; exocyst localization
Fabp12	fatty acid binding protein 12	499570		lipid binding
Faim	Fas apoptotic inhibitory molecule	140930		cytoplasm; apoptotic process; I-kappaB kinase/NF-kappaB signaling; negative regulation of apoptotic process; positive regulation of neurogenesis; negative regulation of extrinsic apoptotic signaling pathway via death domain receptors
Fam134b
Fam151a	family with sequence similarity 151, member A	313430		integral component of membrane
Fam170b	family with sequence similarity 170, member B	100362169		acrosomal vesicle; outer acrosomal membrane; regulation of fertilization; positive regulation of acrosome reaction
Fam198a
Fam198b
Fam214b	family with sequence similarity 214, member B	298201		nucleus
Fam71f1	family with sequence similarity 71, member F1	500061
Fmod	fibromodulin	64507		molecular_function; extracellular region; collagen fibril organization; wound healing; odontogenesis; skin development; collagen-containing extracellular matrix
Foxh1	forkhead box H1	300054		negative regulation of transcription by RNA polymerase II; nuclear chromatin; DNA-binding transcription activator activity, RNA polymerase II-specific; heart looping; secondary heart field specification; outflow tract morphogenesis; cardiac right ventricle morphogenesis; ventricular trabecula myocardium morphogenesis; DNA binding; DNA-binding transcription factor activity; nucleus; transcription …
Fxyd6	FXYD domain-containing ion transport regulator 6	63847		plasma membrane; ion transport; integral component of membrane; sodium channel regulator activity; regulation of ion transport; glutamatergic synapse; integral component of postsynaptic membrane; integral component of presynaptic membrane; ion channel regulator activity; regulation of sodium ion transmembrane transporter activity
Gckr	glucokinase regulator	25658		cellular glucose homeostasis; enzyme inhibitor activity; protein binding; nucleus; nucleoplasm; cytoplasm; mitochondrion; cytosol; glucose metabolic process; protein import into nucleus; response to fructose; enzyme binding; protein domain specific binding; carbohydrate binding; negative regulation of glucokinase activity; positive regulation of glucokinase activity; protein localization to nucle…
Gcnt7	glucosaminyl (N-acetyl) transferase family member 7	102550196		acetylglucosaminyltransferase activity; membrane
Gdf9	growth differentiation factor 9	59304		ovarian cumulus expansion; oocyte growth; blastocyst development; cytokine activity; transforming growth factor beta receptor binding; extracellular space; cytoplasm; growth factor activity; positive regulation of cell proliferation; regulation of signaling receptor activity; positive regulation of pathway-restricted SMAD protein phosphorylation; negative regulation of cell growth; BMP signaling …
Gemin7l1	gem (nuclear organelle) associated protein 7-like 1	685068		SMN-Sm protein complex
Gif
Gjb5	gap junction protein, beta 5	29586		connexin complex; cell communication; integral component of membrane; trophoblast giant cell differentiation; spongiotrophoblast differentiation; labyrinthine layer morphogenesis; epididymis development
Gjc3	gap junction protein, gamma 3	288529		connexin complex; cell communication; sensory perception of sound; integral component of membrane; myelination; protein homodimerization activity; myelin sheath
Got1l1	glutamic-oxaloacetic transaminase 1-like 1	306540		L-aspartate:2-oxoglutarate aminotransferase activity; cytosol; aspartate biosynthetic process; pyridoxal phosphate binding
Gpcpd1	glycerophosphocholine phosphodiesterase 1	362219		cytoplasm; cytosol; skeletal muscle tissue development; glycerophospholipid catabolic process; glycerophosphocholine phosphodiesterase activity; starch binding
Gpr162	G protein-coupled receptor 162	362436		G protein-coupled receptor activity; G protein-coupled receptor signaling pathway; integral component of membrane
Gpr17	G protein-coupled receptor 17	767613		negative regulation of inflammatory response to antigenic stimulus; G protein-coupled receptor activity; integral component of plasma membrane; receptor serine/threonine kinase binding; positive regulation of Rho protein signal transduction; oligodendrocyte differentiation; positive regulation of cytosolic calcium ion concentration involved in phospholipase C-activating G protein-coupled signalin…
Gpr81	G protein-coupled receptor 81	689936		G protein-coupled receptor activity; G protein-coupled receptor signaling pathway; membrane; integral component of membrane; negative regulation of lipid catabolic process
Gprc5c	G protein-coupled receptor, class C, group 5, member C	287805		G protein-coupled receptor activity; plasma membrane; G protein-coupled receptor signaling pathway; integral component of membrane; protein kinase activator activity; activation of protein kinase activity; intracellular membrane-bounded organelle; receptor complex; extracellular exosome
Gramd2
Gsdmd	gasdermin D	315084		phosphatidylserine binding; phosphatidylinositol-4,5-bisphosphate binding; extracellular space; nucleoplasm; cytosol; plasma membrane; cytolysis; cellular response to extracellular stimulus; pore formation in membrane of other organism; pore complex assembly; positive regulation of interleukin-1 beta secretion; defense response to Gram-negative bacterium; defense response to Gram-positive bacteri…
Gstm6l	glutathione S-transferase, mu 6-like	295362		molecular_function; glutathione transferase activity; cellular_component; biological_process
Gucy2g	guanylate cyclase 2G	245708		peptide receptor activity; guanylate cyclase activity; protein kinase activity; ATP binding; GTP binding; cytoplasm; plasma membrane; cGMP biosynthetic process; protein phosphorylation; signal transduction; receptor guanylyl cyclase signaling pathway; external side of plasma membrane; integral component of membrane; intracellular signal transduction
Hamp	hepcidin antimicrobial peptide	84604		negative regulation of transcription by RNA polymerase II; myeloid cell homeostasis; molecular_function; hormone activity; copper ion binding; extracellular region; extracellular space; nucleus; cytoplasm; cellular iron ion homeostasis; acute-phase response; JAK-STAT cascade; aging; response to iron ion; response to zinc ion; regulation of signaling receptor activity; intercalated disc; response …
Hba2
Hcn3	hyperpolarization-activated cyclic nucleotide-gated potassium channel 3	114245		voltage-gated sodium channel activity; voltage-gated potassium channel activity; plasma membrane; integral component of plasma membrane; axon; dendrite; cAMP binding; regulation of ion transmembrane transport; sodium ion transmembrane transport; regulation of membrane potential; neuronal cell body; cone cell pedicle; synapse; potassium ion transmembrane transport; response to cisplatin; cellular …
Hist1h1d	histone cluster 1, H1d	201097		negative regulation of transcription by RNA polymerase II; nucleotide binding; chromatin; nuclear nucleosome; DNA binding; double-stranded DNA binding; calcium ion binding; ATP binding; GTP binding; nucleus; nuclear heterochromatin; nucleosome assembly; regulation of transcription by RNA polymerase II; AMP binding; nucleosome positioning; chromosome condensation; chromatin DNA binding; dATP bindi…
Hmx2	H6 family homeobox 2	293538		nucleus; regulation of transcription, DNA-templated; brain development; positive regulation of cell proliferation; inner ear morphogenesis; sequence-specific DNA binding; positive regulation of mRNA splicing, via spliceosome
Hpgd	15-hydroxyprostaglandin dehydrogenase	79242		kidney development; catalytic activity; prostaglandin E receptor activity; extracellular space; nucleoplasm; cytoplasm; cytosol; prostaglandin metabolic process; transforming growth factor beta receptor signaling pathway; female pregnancy; parturition; basolateral plasma membrane; 15-hydroxyprostaglandin dehydrogenase (NAD+) activity; ovulation; response to estradiol; response to lipopolysacchari…
Hs3st6	heparan sulfate-glucosamine 3-sulfotransferase 6	684979		blastocyst hatching; [heparan sulfate]-glucosamine 3-sulfotransferase 1 activity; heparan sulfate proteoglycan biosynthetic process; heparan sulfate sulfotransferase activity
Hsd17b11	hydroxysteroid (17-beta) dehydrogenase 11	289456		estradiol 17-beta-dehydrogenase activity; extracellular region; cytoplasm; lipid droplet; steroid biosynthetic process; androgen catabolic process; steroid dehydrogenase activity; oxidation-reduction process
Hspb8	heat shock protein family B (small) member 8	113906		nucleus; cytoplasm; cytosol; cellular response to unfolded protein; identical protein binding; protein homodimerization activity; chaperone complex; positive regulation of aggrephagy
Ifi44	interferon-induced protein 44	310969		immune response; response to bacterium
Igfals	insulin-like growth factor binding protein, acid labile subunit	79438		insulin-like growth factor binding; extracellular space; nucleoplasm; cell adhesion; aging; extracellular matrix; response to nutrient levels; insulin-like growth factor ternary complex; cellular response to interleukin-1; cellular response to epidermal growth factor stimulus; cellular response to growth hormone stimulus; cellular response to dexamethasone stimulus
Igsf21	immunoglobin superfamily, member 21	298591		cell junction; anchored component of external side of plasma membrane; presynaptic membrane; postsynaptic membrane; synapse maturation; inhibitory synapse
Il36b	interleukin 36, beta	362076		positive regulation of cytokine production; cytokine activity; interleukin-1 receptor binding; extracellular space; inflammatory response; immune response; regulation of signaling receptor activity; cytokine-mediated signaling pathway; neutrophil chemotaxis; positive regulation of interleukin-6 production; positive regulation of I-kappaB kinase/NF-kappaB signaling; positive regulation of T cell d…
Iqcf1	IQ motif containing F1	503227		acrosomal vesicle; calmodulin binding; positive regulation of flagellated sperm motility involved in capacitation; positive regulation of acrosome reaction
Irx2	iroquois homeobox 2	306657		negative regulation of transcription by RNA polymerase II; metanephros development; nucleus; sequence-specific DNA binding; specification of loop of Henle identity; proximal/distal pattern formation involved in metanephric nephron development
Iyd	iodotyrosine deiodinase	308129		iodide peroxidase activity; nucleoplasm; plasma membrane; integral component of plasma membrane; tyrosine metabolic process; FMN binding; oxidoreductase activity; cytoplasmic vesicle membrane; thyroid hormone metabolic process; oxidation-reduction process; cellular oxidant detoxification
Kantr	KDM5C adjacent transcript	105841230		negative regulation of gene expression
Kcnd3	potassium voltage-gated channel subfamily D member 3	65195		ion channel activity; voltage-gated potassium channel activity; A-type (transient outward) potassium channel activity; potassium channel activity; protein binding; plasma membrane; integral component of plasma membrane; caveola; potassium ion transport; voltage-gated potassium channel complex; membrane; integral component of membrane; dendrite; potassium channel complex; regulation of ion transme…
Kcne5	potassium voltage-gated channel subfamily E regulatory subunit 5	681190		molecular_function; voltage-gated potassium channel activity; delayed rectifier potassium channel activity; cellular_component; plasma membrane; regulation of heart contraction; voltage-gated potassium channel complex; biological_process; potassium channel regulator activity; ion channel binding; cardiac muscle contraction; regulation of membrane repolarization; regulation of ventricular cardiac …
Kcng1	potassium voltage-gated channel modifier subfamily G member 1	296395		voltage-gated potassium channel activity; delayed rectifier potassium channel activity; plasma membrane; potassium ion transport; voltage-gated potassium channel complex; integral component of membrane; protein homooligomerization; potassium ion transmembrane transport; regulation of delayed rectifier potassium channel activity
Kirrel2	kirre like nephrin family adhesion molecule 2	100359836		negative regulation of protein phosphorylation; plasma membrane; cell-cell junction; integral component of membrane; slit diaphragm; identical protein binding; cell-cell adhesion
Kiss1	KiSS-1 metastasis-suppressor	289023		G protein-coupled receptor binding; extracellular space; cytoplasm; G protein-coupled receptor signaling pathway; positive regulation of cytosolic calcium ion concentration; negative regulation of cell proliferation; apical plasma membrane; negative regulation of cell migration; kisspeptin receptor binding; positive regulation of luteinizing hormone secretion; neuron projection; neuronal cell bod…
Klf8	Kruppel-like factor 8	302582		negative regulation of transcription by RNA polymerase II; RNA polymerase II proximal promoter sequence-specific DNA binding; DNA-binding transcription factor activity, RNA polymerase II-specific; DNA-binding transcription repressor activity, RNA polymerase II-specific; nucleus; nucleoplasm; cytosol; regulation of transcription by RNA polymerase II; aggresome
Klhdc9	kelch domain containing 9	360878		cyclin binding
Klhl32	kelch-like family member 32	313111
Klhl38	kelch-like family member 38	314996
Knop1	lysine-rich nucleolar protein 1	499255
Krba1	KRAB-A domain containing 1	362358
Krt15	keratin 15	287700		structural constituent of cytoskeleton; intermediate filament; cytoskeleton organization; keratin filament; intermediate filament-based process; scaffold protein binding
Krt81	keratin 81	407761		molecular_function; structural molecule activity; cellular_component; biological_process; keratin filament
Ky	kyphoscoliosis peptidase	315962		muscle organ development; neuromuscular junction development; Z disc
Lancl3	LanC like 3	302540		catalytic activity; plasma membrane
Lca5l	lebercilin LCA5 like	498065		axoneme; intraciliary transport
Ldb2	LIM domain binding 2	289664		negative regulation of transcription by RNA polymerase II; RNA polymerase II activating transcription factor binding; hair follicle development; transcription coregulator activity; nucleus; transcription factor complex; nucleolus; plasma membrane; multicellular organism development; epithelial structure maintenance; enzyme binding; LIM domain binding; regulation of cell migration; cell leading ed…
Lgals4	galectin 4	25474		extracellular space; galactoside binding; carbohydrate binding
Lgi4	leucine-rich repeat LGI family, member 4	361549		extracellular space; adult locomotory behavior; glial cell proliferation; Schwann cell development; glial cell development; myelination in peripheral nervous system; regulation of myelination; gliogenesis; neuron maturation; myelination
Lims2	LIM zinc finger domain containing 2	361303		cytoplasm; plasma membrane; cell-cell junction; focal adhesion; negative regulation of apoptotic process; cell-cell junction organization; metal ion binding; negative regulation of epithelial cell proliferation; cell-cell adhesion; positive regulation of substrate adhesion-dependent cell spreading; negative regulation of neural precursor cell proliferation; negative regulation of hepatocyte proli…
Lin28a	lin-28 homolog A	500562		P-body; G-quadruplex RNA binding; molecular_function; RNA binding; mRNA binding; cellular_component; nucleus; nucleolus; cytoplasm; rough endoplasmic reticulum; polysome; germ cell development; biological_process; zinc ion binding; cytoplasmic stress granule; miRNA metabolic process; miRNA catabolic process; negative regulation of translation; stem cell population maintenance; pre-miRNA processin…
LOC100361018	rCG22048-like	100361018		integral component of membrane
LOC100361556	rCG60069-like	100361556
LOC100364769	LRRG00136-like	100364769
LOC100909776	uncharacterized LOC100909776	100909776
LOC100909857	cytidine deaminase-like	100909857
LOC100910275	integral membrane protein DGCR2/IDD-like	100910275		integral component of membrane
LOC100910401
LOC100910656	ly-6/neurotoxin-like protein 1-like	100910656
LOC100910833	histone-lysine N-methyltransferase setd3-like	100910833		nuclear chromatin; transcription coactivator activity; histone H3-K36 methylation; protein-lysine N-methyltransferase activity; peptidyl-lysine trimethylation; peptidyl-lysine monomethylation; peptidyl-lysine dimethylation; histone methyltransferase activity (H3-K4 specific); positive regulation of transcription by RNA polymerase II; histone methyltransferase activity (H3-K36 specific); histone H…
LOC100910838	neuronal tyrosine-phosphorylated phosphoinositide-3-kinase adapter 1-like	100910838		phosphatidylinositol 3-kinase signaling; neuron projection morphogenesis
LOC100911440	mitochondrial glutamate carrier 1-like	100911440		L-glutamate transmembrane transporter activity; L-aspartate transmembrane transporter activity; aspartate transmembrane transport; L-glutamate transmembrane transport; integral component of membrane; malate-aspartate shuttle; L-aspartate transmembrane transport
LOC100911486	multiple epidermal growth factor-like domains protein 6-like	100911486		calcium ion binding
LOC100911949
LOC100912163	AT-rich interactive domain-containing protein 4B-like	100912163		DNA binding; nucleus; regulation of transcription, DNA-templated
LOC102548472	uncharacterized LOC102548472	102548472
LOC102550375	uncharacterized LOC102550375	102550375
LOC102551716
LOC102552988	uncharacterized LOC102552988	102552988		integral component of membrane
LOC103689920	uncharacterized LOC103689920	103689920
LOC103689961	selenoprotein W-like	103689961
LOC103689968	protein FAM134B	103689968		nucleic acid binding; cis-Golgi network; zinc ion binding; sensory perception of pain; integral component of endoplasmic reticulum membrane; negative regulation of neuron apoptotic process; reticulophagy
LOC103690017	serine/threonine-protein kinase tousled-like 1	103690017		protein kinase activity; ATP binding; protein phosphorylation
LOC103690028	zinc finger protein 622	103690028		nucleic acid binding; zinc ion binding; integral component of endoplasmic reticulum membrane; reticulophagy
LOC103690044	glutathione S-transferase omega-2	103690044		glutathione transferase activity; cytoplasm; xenobiotic metabolic process; oxidoreductase activity; L-ascorbic acid metabolic process; glutathione dehydrogenase (ascorbate) activity; methylarsonate reductase activity; oxidation-reduction process; cellular response to arsenic-containing substance; cellular oxidant detoxification
LOC103691893	putative ERV-F(c)1 provirus ancestral Env polyprotein	103691893
LOC103692716	heat shock protein HSP 90-alpha	103692716		protein binding; nucleus; cytoplasm; lysosomal membrane; response to heat; response to cold; ATPase activity; nitric-oxide synthase regulator activity; TPR domain binding; melanosome; myelin sheath; positive regulation of nitric oxide biosynthetic process; response to antibiotic; regulation of catalytic activity; regulation of protein complex stability; chaperone-mediated autophagy; chaperone-med…
LOC103693384	epididymal secretory protein E3-beta-like	103693384
LOC103693823	epididymal secretory protein E3-beta-like	103693823
LOC103694855	hemoglobin subunit beta-2-like	103694855		oxygen carrier activity; hemoglobin complex; oxygen transport; oxygen binding; heme binding; metal ion binding
LOC103694864	matrix metalloproteinase-28-like	103694864		proteolysis; zinc ion binding; extracellular matrix
LOC103694874	stromelysin-3	103694874		proteolysis; multicellular organism development; zinc ion binding; extracellular matrix
LOC108348064	gamma-secretase subunit APH-1B-like	108348064		transport vesicle; positive regulation of catalytic activity
LOC108348189	COMM domain-containing protein 5	108348189
LOC108348322	GAS2-like protein 2	108348322		microtubule bundle formation; stress fiber; cytoplasm; microtubule; negative regulation of microtubule depolymerization; microtubule binding; cytoskeletal adaptor activity; actin filament binding
LOC289035	similar to UDP-N-acetylglucosamine:a-1,3-D-mannoside beta-1,4-N-acetylgluco	289035		protein N-linked glycosylation; acetylglucosaminyltransferase activity
LOC367195	similar to 60S RIBOSOMAL PROTEIN L7	367195
LOC498236	LRRGT00186	498236
LOC498424	similar to GC-rich promoter binding protein 1-like 1	498424
LOC500684	hypothetical protein LOC500684	500684		mRNA splicing, via spliceosome; RNA binding; U2-type catalytic step 1 spliceosome; catalytic step 2 spliceosome
LOC500948	LRRGT00073	500948
LOC685699	hypothetical protein LOC685699	685699		structural molecule activity; bicellular tight junction; integral component of membrane
LOC688801	hypothetical protein LOC688801	688801
LOC689065	hypothetical protein LOC689065	689065
LOC689230	similar to stefin A2	689230		cysteine-type endopeptidase inhibitor activity; cytosol; negative regulation of endopeptidase activity
LOC690276	hypothetical protein LOC690276	690276
LOC691083	hypothetical protein LOC691083	691083
LOC691658	similar to anterior pharynx defective 1b homolog	691658
Loxl4	lysyl oxidase-like 4	309380		protein-lysine 6-oxidase activity; scavenger receptor activity; copper ion binding; extracellular region; extracellular space; membrane; vesicle-mediated transport; peptidyl-lysine oxidation; collagen fibril organization; receptor complex
Lpal2	lipoprotein(a) like 2, pseudogene	690326
Lpin2	lipin 2	316737		transcription coactivator activity; nucleus; endoplasmic reticulum membrane; cytosol; lipid metabolic process; phosphatidate phosphatase activity; fatty acid catabolic process; dephosphorylation; triglyceride biosynthetic process; cellular response to insulin stimulus; positive regulation of transcription by RNA polymerase II
Lrrc10b	leucine rich repeat containing 10B	309208
Lrrc15	leucine rich repeat containing 15	246296		fibronectin binding; collagen binding; cell surface; integral component of membrane; positive regulation of cell migration; laminin binding; receptor-mediated virion attachment to host cell; collagen-containing extracellular matrix; negative regulation of protein localization to plasma membrane
Lrrc17	leucine rich repeat containing 17	502715		extracellular space; extracellular matrix; negative regulation of osteoclast differentiation; bone marrow development
Lrrc23	leucine rich repeat containing 23	312707		cytosol
Lrrc31	leucine rich repeat containing 31	310256
Lrrc3b	leucine rich repeat containing 3B	305705		extracellular space; integral component of membrane; extracellular matrix
Lrrc55	leucine rich repeat containing 55	311171		voltage-gated potassium channel activity; voltage-gated potassium channel complex; integral component of membrane; ion channel binding; potassium ion transmembrane transport; potassium channel activator activity; positive regulation of voltage-gated potassium channel activity
Lrrn4	leucine rich repeat neuronal 4	311443		integral component of plasma membrane; long-term memory; visual learning
Lrtm2	leucine-rich repeats and transmembrane domains 2	680883		extracellular space; axon guidance; heparin binding; integral component of membrane; Roundabout binding; negative chemotaxis; positive regulation of synapse assembly
Ly6g6d	lymphocyte antigen 6 family member G6D	415062		external side of plasma membrane; acetylcholine receptor inhibitor activity; anchored component of membrane; protein-containing complex; identical protein binding; protein homooligomerization; acetylcholine receptor signaling pathway; negative regulation of signaling receptor activity
Ly6g6e	lymphocyte antigen 6 family member G6E	406866		desensitization of G protein-coupled receptor signaling pathway; transmembrane receptor protein serine/threonine kinase activity; plasma membrane; transmembrane receptor protein serine/threonine kinase signaling pathway; acetylcholine receptor activator activity; acetylcholine receptor binding; acetylcholine receptor signaling pathway; positive regulation of signaling receptor activity
Ly75	lymphocyte antigen 75	499800		transmembrane signaling receptor activity; external side of plasma membrane; integral component of membrane
Lypd6	LY6/PLAUR domain containing 6	679564		extracellular region; cytoplasm; plasma membrane; membrane; cell junction; acetylcholine receptor regulator activity; acetylcholine receptor inhibitor activity; anchored component of membrane; neuron projection; membrane raft; synapse; regulation of neurotransmitter receptor activity; negative regulation of signaling receptor activity
Magee2	MAGE family member E2	302392
Mall	mal, T-cell differentiation protein-like	362211		Golgi membrane; plasma membrane; integral component of membrane; structural constituent of myelin sheath; clathrin-coated vesicle; cytoplasmic vesicle; myelination; membrane raft
Mamdc2	MAM domain containing 2	309410		glycosaminoglycan binding; interstitial matrix; endoplasmic reticulum; peptide cross-linking via chondroitin 4-sulfate glycosaminoglycan; extracellular matrix
Mapk4	mitogen-activated protein kinase 4	54268		MAPK cascade; MAP kinase activity; ATP binding; nucleus; cytoplasm; regulation of gene expression; protein kinase binding; intracellular signal transduction; protein homodimerization activity; protein heterodimerization activity; cellular response to organic substance
Matn1	matrilin 1	297894		chondrocyte differentiation; growth plate cartilage chondrocyte morphogenesis; extracellular matrix structural constituent; calcium ion binding; extracellular space; regulation of bone mineralization; extracellular matrix; collagen-containing extracellular matrix
Matn4	matrilin 4	296358		growth plate cartilage chondrocyte morphogenesis; calcium ion binding; extracellular space; extracellular matrix; response to axon injury; collagen-containing extracellular matrix
Mcpt3	mast cell peptidase 3	290244		serine-type endopeptidase activity; proteolysis; mast cell granule
Mcpt4	mast cell protease 4	54270		serine-type endopeptidase activity; extracellular space; cytoplasm; proteolysis; heparin binding; peptide binding
Mcpt4l1	mast cell protease 4-like 1	408208
Megf10	multiple EGF-like domains 10	291445		complement component C1q binding; phagocytic cup; scavenger receptor activity; Notch binding; plasma membrane; skeletal muscle satellite cell activation; skeletal muscle satellite cell differentiation; skeletal muscle satellite cell proliferation; integral component of membrane; muscle cell proliferation; homotypic cell-cell adhesion; myelination; apoptotic cell clearance; engulfment of apoptotic…
Megf6	multiple EGF-like-domains 6	65049		calcium ion binding; extracellular region
Mfsd2a	major facilitator superfamily domain containing 2A	298504		phospholipid transporter activity; integral component of plasma membrane; carbohydrate transport; fatty acid transmembrane transporter activity; symporter activity; fatty acid transport; hippocampus development; transcytosis; lysophospholipid transport; lysophospholipid transporter activity; transmembrane transport; establishment of blood-brain barrier; organic substance transport; lipid transpor…
Mir142	microRNA 142	100314034		cellular response to decreased oxygen levels; cellular response to lipopolysaccharide; cellular response to estrogen stimulus; cellular response to leukemia inhibitory factor
Mir143	microRNA 143	100314035		embryo implantation; regulation of glucose metabolic process; miRNA mediated inhibition of translation; synapse; positive regulation of transcription by RNA polymerase II; negative regulation of insulin receptor signaling pathway; negative regulation of protein kinase B signaling; aorta smooth muscle tissue morphogenesis; cardiac vascular smooth muscle cell differentiation; cellular response to m…
Mir193a	microRNA 193a	100526630		male sex differentiation; cellular response to lipopolysaccharide; cellular response to amino acid stimulus
Mir194-2	microRNA 194-2	100314047		response to bacterium; micro-ribonucleoprotein complex; cellular response to lipopolysaccharide; cellular response to amino acid stimulus; cellular response to mechanical stimulus
Mir1b	microRNA 1b	104796289		regulation of gene expression; posttranscriptional regulation of gene expression; negative regulation of gene expression; negative regulation of translation; micro-ribonucleoprotein complex; gene silencing by miRNA; regulation of calcineurin-NFAT signaling cascade; cellular response to leukemia inhibitory factor
Mir223	microRNA 223	100314060		response to bacterium; regulation of gene expression; positive regulation of granulocyte differentiation; gene silencing by miRNA; cellular response to decreased oxygen levels; response to oxygen levels; cellular response to lipopolysaccharide; cellular response to estrogen stimulus; positive regulation of cell proliferation in bone marrow; cellular response to leukemia inhibitory factor
Mir23b	microRNA 23b	100314002		cell aging; sensory perception of sound; regulation of gene expression; myelination; positive regulation of angiogenesis; long-term synaptic potentiation; retina vasculature development in camera-type eye; cellular response to lipopolysaccharide; regulation of semaphorin-plexin signaling pathway
Mir339	microRNA 339	100314146		cellular response to ethanol; cellular response to leukemia inhibitory factor
Mir342	microRNA 342	100313980		cell aging; sensory perception of sound; micro-ribonucleoprotein complex; long-term synaptic potentiation; cellular response to lipopolysaccharide; cellular response to amino acid stimulus; cellular response to inorganic substance; cellular response to forskolin; cellular response to leukemia inhibitory factor
Mir6333	microRNA 6333	102465167
Moxd1	monooxygenase, DBH-like 1	294119		dopamine beta-monooxygenase activity; copper ion binding; extracellular space; cytoplasm; endoplasmic reticulum membrane; octopamine biosynthetic process; oxidoreductase activity, acting on paired donors, with incorporation or reduction of molecular oxygen, reduced ascorbate as one donor, and incorporation of one atom of oxygen; secretory granule membrane; dopamine catabolic process; norepinephri…
Moxd2	monooxygenase, DBH-like 2	500092		dopamine beta-monooxygenase activity; copper ion binding; extracellular space; cytoplasm; octopamine biosynthetic process; oxidoreductase activity, acting on paired donors, with incorporation or reduction of molecular oxygen, reduced ascorbate as one donor, and incorporation of one atom of oxygen; secretory granule membrane; dopamine catabolic process; norepinephrine biosynthetic process; oxidati…
Mreg	melanoregulin	501162		melanocyte differentiation; cytoplasmic vesicle membrane; intrinsic component of organelle membrane; late endosome membrane; melanosome localization; melanosome transport; protein-containing complex; melanosome membrane; phosphatidylinositol binding; melanosome; pigmentation; developmental pigmentation; minus-end-directed organelle transport along microtubule; phagosome maturation
Ms4a4a	membrane spanning 4-domains A4A	361734		integral component of membrane
Mt1	metallothionein 1	24567		molecular_function; copper ion binding; cellular_component; nucleus; cytoplasm; lysosome; cytosol; cellular metal ion homeostasis; cellular zinc ion homeostasis; nitric oxide mediated signal transduction; zinc ion binding; response to zinc ion; detoxification of copper ion; negative regulation of neuron apoptotic process; negative regulation of growth; response to cadmium ion; metal ion binding; …
Mt2A	metallothionein 2A	689415		cellular_component; nucleus; cytoplasm; cellular zinc ion homeostasis; nitric oxide mediated signal transduction; drug binding; zinc ion binding; response to bacterium; detoxification of copper ion; cellular response to drug; cellular response to interleukin-3; cellular response to erythropoietin; negative regulation of growth; cadmium ion binding; astrocyte activation; perinuclear region of cyto…
Mustn1	musculoskeletal, embryonic nuclear protein 1	290553		chondrocyte differentiation; nucleus; nucleoplasm; positive regulation of gene expression; embryonic limb morphogenesis; positive regulation of chondrocyte differentiation; chondrocyte proliferation; wound healing; tissue regeneration; positive regulation of proteoglycan biosynthetic process; positive regulation of chondrocyte proliferation
Mx1	myxovirus (influenza virus) resistance 1	24575		mitochondrial fission; dynamin family protein polymerization involved in mitochondrial fission; GTPase activity; GTP binding; nucleus; cytoplasm; endoplasmic reticulum membrane; microtubule binding; response to virus; membrane; mitochondrial membrane; innate immune response; perinuclear region of cytoplasm; defense response to virus; membrane fusion
Mxd3	Max dimerization protein 3	252915		negative regulation of transcription by RNA polymerase II; RNA polymerase II regulatory region sequence-specific DNA binding; DNA-binding transcription repressor activity, RNA polymerase II-specific; DNA binding; nucleus; negative regulation of transcription, DNA-templated; protein dimerization activity; RNA polymerase II transcription factor complex
Mybpc1	myosin binding protein C, slow type	362867		striated muscle thin filament; muscle contraction; cell adhesion; structural constituent of muscle; myosin binding; sarcomere; Z disc; skeletal muscle thin filament assembly; skeletal muscle myosin thick filament assembly; M band; myosin filament; sarcomere organization; cardiac muscle fiber development; actin filament binding; muscle alpha-actinin binding; cardiac myofibril assembly; cardiac mus…
Mzb1	marginal zone B and B1 cell-specific protein	291675		positive regulation of immunoglobulin biosynthetic process; molecular_function; cellular_component; extracellular region; cytoplasm; endoplasmic reticulum lumen; biological_process; positive regulation of cell proliferation; regulation of B cell proliferation; integrin activation; endoplasmic reticulum chaperone complex; regulation of cell proliferation; regulation of insulin receptor signaling p…
Naprt	nicotinate phosphoribosyltransferase	315085		nicotinate-nucleotide diphosphorylase (carboxylating) activity; nicotinate phosphoribosyltransferase activity; cytosol; response to oxidative stress; NAD biosynthetic process; nicotinate nucleotide salvage; NAD salvage; metal ion binding
Nat8f4	N-acetyltransferase 8 (GCN5-related) family member 4	102549803		integral component of membrane
Ncan	neurocan	58982		skeletal system development; calcium ion binding; hyaluronic acid binding; plasma membrane; cell adhesion; central nervous system development; carbohydrate binding; extracellular matrix; synapse; regulation of synapse structural plasticity; perineuronal net
Neurod4	neuronal differentiation 4	288821		neuron migration; molecular_function; DNA binding; cellular_component; nucleus; regulation of transcription, DNA-templated; Notch signaling pathway; neuroblast proliferation; glial cell differentiation; amacrine cell differentiation; camera-type eye development; cell fate commitment; positive regulation of cell differentiation; protein dimerization activity; neuron development; retina development…
NEWGENE_1306399	cyclin J	108348094		protein phosphorylation
NEWGENE_620180	solute carrier family 40 member 1	108348131		iron ion transmembrane transporter activity; integral component of membrane; iron ion transmembrane transport
Nkx1-2	NK1 homeobox 2	293568		RNA polymerase II proximal promoter sequence-specific DNA binding; DNA-binding transcription factor activity; nucleus; cell differentiation; sequence-specific DNA binding; positive regulation of transcription by RNA polymerase II
Nkx6-3	NK6 homeobox 3	685102		RNA polymerase II proximal promoter sequence-specific DNA binding; cell fate determination; glandular epithelial cell differentiation; DNA-binding transcription factor activity; nucleus; cell differentiation; negative regulation of epithelial cell differentiation; sequence-specific DNA binding; positive regulation of transcription by RNA polymerase II
Nme5	NME/NM23 family member 5	688903		epithelial cilium movement; nucleoside diphosphate kinase activity; nucleoside diphosphate phosphorylation; GTP biosynthetic process; UTP biosynthetic process; CTP biosynthetic process; spermatid development; ventricular system development; sperm flagellum; cilium assembly; negative regulation of oxidative stress-induced intrinsic apoptotic signaling pathway
Noct	nocturnin	310395		3'-5'-exoribonuclease activity; nuclear-transcribed mRNA poly(A) tail shortening; deadenylation-dependent decapping of nuclear-transcribed mRNA; P-body; mRNA binding; poly(A)-specific ribonuclease activity; nucleus; cytoplasm; mRNA processing; circadian rhythm; response to extracellular stimulus; negative regulation of gene expression; CCR4-NOT complex; response to lipopolysaccharide; circadian r…
Nppc	natriuretic peptide C	114593		ossification; response to hypoxia; growth plate cartilage chondrocyte differentiation; growth plate cartilage chondrocyte proliferation; signaling receptor binding; hormone activity; extracellular space; cGMP biosynthetic process; protein folding; receptor guanylyl cyclase signaling pathway; negative regulation of cell proliferation; post-embryonic development; regulation of signaling receptor ac…
Nqo1	NAD(P)H quinone dehydrogenase 1	24314		NAD(P)H dehydrogenase (quinone) activity; superoxide dismutase activity; cytoplasm; cytosol; superoxide metabolic process; response to oxidative stress; aging; response to nutrient; electron transfer activity; response to organic cyclic compound; oxidoreductase activity; removal of superoxide radicals; electron transport chain; dendrite; response to estradiol; identical protein binding; neuronal …
Nr1d2	nuclear receptor subfamily 1, group D, member 2	259241		negative regulation of transcription by RNA polymerase II; transcription regulatory region sequence-specific DNA binding; RNA polymerase II regulatory region sequence-specific DNA binding; RNA polymerase II proximal promoter sequence-specific DNA binding; RNA polymerase II distal enhancer sequence-specific DNA binding; DNA-binding transcription factor activity, RNA polymerase II-specific; proxima…
Nrep	neuronal regeneration related protein	338475		nucleus; cytoplasm; regulation of transforming growth factor beta receptor signaling pathway; axon regeneration; regulation of neuron differentiation
Nrsn2	neurensin 2	689978		plasma membrane; nervous system development; integral component of membrane; transport vesicle; cytoplasmic vesicle; neuron projection; neuronal cell body
Ntm	neurotrimin	50864		extracellular space; plasma membrane; cell adhesion; cell surface; negative regulation of neuron projection development; cerebellum development; axon; anchored component of membrane; response to estradiol; perinuclear region of cytoplasm; excitatory synapse
Nup62cl	nucleoporin 62 C-terminal like	300923		nuclear pore; nucleocytoplasmic transport; porin activity; structural constituent of nuclear pore; pore complex; transmembrane transport
Nxph4	neurexophilin 4	59316		signaling receptor binding; extracellular region
Nyap1	neuronal tyrosine-phosphorylated phosphoinositide-3-kinase adaptor 1	304376		phosphatidylinositol 3-kinase signaling; neuron projection morphogenesis
Oacyl	O-acyltransferase like	291549		integral component of membrane; transferase activity, transferring acyl groups other than amino-acyl groups
Oas1g	2'-5' oligoadenylate synthetase 1G	100910735		ATP binding; immune response; integral component of membrane
Orm1	orosomucoid 1	24614		acute inflammatory response to antigenic stimulus; chronic inflammatory response to antigenic stimulus; regulation of immune system process; extracellular space; acute-phase response; drug binding; response to organic cyclic compound; animal organ regeneration; response to lipopolysaccharide; negative regulation of interleukin-6 production; negative regulation of tumor necrosis factor production;…
Osbp2	oxysterol binding protein 2	305475		cytosol; plasma membrane; spermatid development; lipid binding; sterol transporter activity; cholesterol binding; sterol transport; membrane; sterol binding; intracellular membrane-bounded organelle; perinuclear endoplasmic reticulum; apical dendrite
Otogl	otogelin-like	685868		extracellular region; sensory perception of sound; L-arabinose metabolic process; alpha-L-arabinofuranosidase activity
Otop1	otopetrin 1	305427		integral component of plasma membrane; detection of gravity; proton channel activity; membrane; biomineral tissue development; cellular response to insulin stimulus; inner ear morphogenesis; negative regulation of interferon-gamma-mediated signaling pathway; proton transmembrane transport
Padi3	peptidyl arginine deiminase 3	29520		protein-arginine deiminase activity; calcium ion binding; nucleus; cytoplasm; protein citrullination; arginine deiminase pathway; histone citrullination; identical protein binding
Panx2	pannexin 2	362979		response to ischemia; gap junction channel activity; cytoplasm; plasma membrane; gap junction; cation transport; cell-cell signaling; channel activity; integral component of membrane; wide pore channel activity; protein hexamerization; protein heterodimerization activity; positive regulation of interleukin-1 secretion; gap junction hemi-channel activity; transmembrane transport
Paqr7	progestin and adipoQ receptor family member 7	313615		steroid hormone receptor activity; steroid binding; plasma membrane; integral component of membrane; signaling receptor activity; steroid hormone mediated signaling pathway; response to steroid hormone
Patl2	PAT1 homolog 2	366176		deadenylation-dependent decapping of nuclear-transcribed mRNA; P-body; RNA binding; nucleus; cytoplasm; negative regulation of cytoplasmic mRNA processing body assembly; cytoplasmic mRNA processing body assembly
Pbld1	phenazine biosynthesis-like protein domain containing 1	171564		cytoplasm; biosynthetic process; negative regulation of epithelial cell migration; negative regulation of epithelial to mesenchymal transition; isomerase activity; maintenance of gastrointestinal epithelium; negative regulation of transforming growth factor beta receptor signaling pathway; identical protein binding; negative regulation of epithelial cell proliferation; negative regulation of SMAD…
Pcdh12	protocadherin 12	116808		calcium ion binding; integral component of plasma membrane; cell-cell junction; glycogen metabolic process; cell adhesion; homophilic cell adhesion via plasma membrane adhesion molecules; spermatogenesis; calcium-dependent cell-cell adhesion via plasma membrane cell adhesion molecules; labyrinthine layer development
Pcdhb12	protocadherin beta 12	25133		calcium ion binding; plasma membrane; integral component of plasma membrane; cell-cell junction; cell adhesion; homophilic cell adhesion via plasma membrane adhesion molecules; integral component of membrane
Pcdhgb4	protocadherin gamma subfamily B, 4	102552705		calcium ion binding; integral component of plasma membrane; cell adhesion; homophilic cell adhesion via plasma membrane adhesion molecules; membrane
Pdia5	protein disulfide isomerase family A, member 5	360722		protein disulfide isomerase activity; endoplasmic reticulum lumen; peptide disulfide oxidoreductase activity; cell redox homeostasis; oxidation-reduction process
Pdzd3	PDZ domain containing 3	500986		cytoplasm; brush border; ion transport; receptor guanylyl cyclase signaling pathway; protein C-terminus binding; negative regulation of cGMP-mediated signaling; membrane; guanylate cyclase inhibitor activity; negative regulation of guanylate cyclase activity; subapical complex; apical part of cell; ubiquitin-specific protease binding
Pdzk1	PDZ domain containing 1	65144		scavenger receptor binding; protein binding; plasma membrane; carnitine transport; apical plasma membrane; PDZ domain binding; cholesterol transport; brush border membrane; microvillus membrane; positive regulation of ion transmembrane transporter activity; regulation of anion transport; protein-containing complex binding; membrane raft; intracellular transport; protein localization to plasma mem…
Phlda2	pleckstrin homology-like domain, family A, member 2	293637		placenta development; animal organ morphogenesis; regulation of gene expression; regulation of cell migration; regulation of embryonic development; regulation of spongiotrophoblast cell proliferation; regulation of glycogen metabolic process; regulation of growth hormone activity
Pi15	peptidase inhibitor 15	301489		extracellular space; proteolysis; peptidase activity
Pkhd1l1	PKHD1 like 1	314917		cilium; integral component of membrane
Plekhb1	pleckstrin homology domain containing B1	64471		cytoplasm; multicellular organism development; protein C-terminus binding; integral component of membrane; protein homodimerization activity; regulation of cell differentiation
Plekhd1	pleckstrin homology and coiled-coil domain containing D1	500685
Plekhs1	pleckstrin homology domain containing S1	499377
Plin2	perilipin 2	298199		molecular_function; nucleus; cytoplasm; lipid droplet; cytosol; plasma membrane; response to organic cyclic compound; long-chain fatty acid transport; lipid storage; response to drug
Plk3	polo-like kinase 3	58936		G1/S transition of mitotic cell cycle; negative regulation of transcription by RNA polymerase II; mitotic cell cycle; response to reactive oxygen species; chromatin; spindle pole; p53 binding; protein kinase activity; protein serine/threonine kinase activity; protein binding; ATP binding; nucleus; nucleolus; cytoplasm; Golgi stack; centrosome; protein phosphorylation; apoptotic process; response …
Plp1	proteolipid protein 1	24943		structural molecule activity; plasma membrane; integral component of plasma membrane; inflammatory response; integrin-mediated signaling pathway; axon ensheathment; glial cell differentiation; positive regulation of gene expression; astrocyte development; structural constituent of myelin sheath; central nervous system myelination; neuron projection development; myelination; long-chain fatty acid …
Ppp1r42	protein phosphatase 1, regulatory subunit 42	683514		manchette; actin binding; centrosome; microtubule organizing center; regulation of phosphatase activity; microtubule cytoskeleton; tubulin binding; dynein complex binding
Prelp	proline and arginine rich end leucine rich repeat protein	84400		extracellular matrix structural constituent; cell aging; heparin binding; extracellular matrix; collagen-containing extracellular matrix
Prmt8	protein arginine methyltransferase 8	688502		molecular_function; cellular_component; cytosol; plasma membrane; regulation of transcription, DNA-templated; protein methylation; biological_process; histone-arginine N-methyltransferase activity; S-adenosylmethionine-dependent methyltransferase activity; histone methylation; peptidyl-arginine methylation; peptidyl-arginine methylation, to asymmetrical-dimethyl arginine; histone arginine methyla…
Prr13	proline rich 13	363004		nucleus; nucleoplasm; cytosol
Prr15	proline rich 15	312358
Prrt4	proline-rich transmembrane protein 4	500059		integral component of membrane
Prss12	serine protease 12	85266		serine-type endopeptidase activity; scavenger receptor activity; plasma membrane; proteolysis; exocytosis; peptidase activity; axon; dendrite; cytoplasmic vesicle; zymogen activation; synaptic cleft; terminal bouton; synapse
Prss35	serine protease 35	315866		serine-type endopeptidase activity; extracellular region; proteolysis
Prss57	serine protease 57	408241		serine-type endopeptidase activity; extracellular space; proteolysis; heparin binding; serine-type peptidase activity; azurophil granule lumen
Ptgr1	prostaglandin reductase 1	192227		cytoplasm; prostaglandin metabolic process; 2-alkenal reductase [NAD(P)] activity; 13-prostaglandin reductase activity; 15-oxoprostaglandin 13-oxidase activity; oxidation-reduction process; response to antineoplastic agent
Ptprz1	protein tyrosine phosphatase, receptor type Z1	25613		hematopoietic progenitor cell differentiation; protein tyrosine phosphatase activity; integrin binding; protein binding; extracellular space; cytoplasm; plasma membrane; protein dephosphorylation; axonogenesis; axonal fasciculation; brain development; learning or memory; negative regulation of cell proliferation; visual learning; negative regulation of cell-substrate adhesion; positive regulation…
Rab24	RAB24, member RAS oncogene family	361208		GTPase activity; GTP binding; autophagosome
Rab38	RAB38, member RAS oncogene family	252916		GTPase activity; GTP binding; cytoplasm; mitochondrion; lysosome; early endosome; endoplasmic reticulum; Golgi apparatus; trans-Golgi network; cytosol; intracellular protein transport; organelle organization; mitochondrion organization; membrane; vesicle-mediated transport; GDP binding; GTP-dependent protein binding; vesicle; Rab protein signal transduction; melanosome membrane; endosome to melan…
Rbm11	RNA binding motif protein 11	288321		regulation of alternative mRNA splicing, via spliceosome; single-stranded RNA binding; nucleus; nucleoplasm; poly(U) RNA binding; nuclear speck; cellular response to oxidative stress; protein homodimerization activity
Rbm46	RNA binding motif protein 46	310548		trophectodermal cell differentiation; RNA binding; mRNA binding; nucleus; mRNA stabilization
Reg1a	regenerating family member 1 alpha	24714		response to hypoxia; transmembrane signaling receptor activity; signaling receptor binding; protein binding; extracellular space; cytosol; midgut development; growth factor activity; positive regulation of cell proliferation; negative regulation of cell proliferation; regulation of signaling receptor activity; positive regulation of gene expression; response to organic cyclic compound; phosphatas…
Reg3b	regenerating family member 3 beta	24618		positive regulation of protein phosphorylation; transmembrane signaling receptor activity; extracellular space; cytoplasm; acute-phase response; midgut development; female pregnancy; positive regulation of cell proliferation; response to bacterium; growth factor binding; carbohydrate binding; response to nutrient levels; response to estradiol; protein-containing complex; cellular response to drug…
Reg4	regenerating family member 4	445583		transmembrane signaling receptor activity; extracellular region; cytoplasm; heparin binding; response to bacterium; mannan binding
Retn	resistin	246250		hormone activity; extracellular region; extracellular space; nucleus; aging; response to mechanical stimulus; regulation of signaling receptor activity; positive regulation of collagen metabolic process; positive regulation of smooth muscle cell migration; response to insulin; fat cell differentiation; positive regulation of smooth muscle cell proliferation; positive regulation of synaptic transm…
Rfx2	regulatory factor X2	301121		RNA polymerase II regulatory region sequence-specific DNA binding; RNA polymerase II proximal promoter sequence-specific DNA binding; acrosome assembly; DNA-binding transcription factor activity; nucleus; cytoplasm; regulation of transcription by RNA polymerase II; spermatid development; positive regulation of transcription by RNA polymerase II; cilium assembly; cellular response to leukemia inhi…
RGD1304770	similar to Na+ dependent glucose transporter 1	309810		glucose transmembrane transporter activity; integral component of membrane; glucose transmembrane transport
RGD1305645	similar to RIKEN cDNA 1500015O10	363225		extracellular space; apical plasma membrane; dense core granule; anaphase-promoting complex-dependent catabolic process; G1 to G0 transition; cellular senescence
RGD1307537	similar to RIKEN cDNA 4933417A18	291077		nucleic acid binding
RGD1307603	similar to hypothetical protein MGC37914	293656		glutathione transferase activity; cytosol; glutathione metabolic process; xenobiotic catabolic process
RGD1309110	similar to Hypothetical protein MGC58999	295352		chitinase activity; extracellular region; carbohydrate metabolic process; chitin catabolic process; chitin binding
RGD1309651	similar to 1190005I06Rik protein	361424
RGD1310507	similar to RIKEN cDNA 1300017J02	315963		enzyme inhibitor activity; extracellular region; extracellular space; negative regulation of catalytic activity
RGD1311744	similar to RIKEN cDNA 5830475I06	300608		cardiac muscle cell fate commitment
RGD1359449	gasdermin domain containing protein RGD1359449	314959		phosphatidylserine binding; phosphatidylinositol-4,5-bisphosphate binding; pyroptosis; phosphatidylinositol-4-phosphate binding
RGD1560608
RGD1561102	similar to ribosomal protein S12	299713		structural constituent of ribosome; translation; cytosolic small ribosomal subunit
RGD1561777	similar to Na+ dependent glucose transporter 1	499463		glucose transmembrane transporter activity; integral component of membrane; glucose transmembrane transport
RGD1563231	similar to immunoglobulin kappa-chain VK-1	502832		immunoglobulin production; extracellular space; immune response
RGD1563354	similar to hypothetical protein D630003M21	311592
RGD1564801	similar to hepatic multiple inositol polyphosphate phosphatase	499084		acid phosphatase activity; dephosphorylation; inositol phosphate phosphatase activity
RGD1564899	similar to chromosome 10 open reading frame 71	498579		Z disc; positive regulation of calcineurin-NFAT signaling cascade
RGD1565212	similar to 4930578I06Rik protein	498534
RGD1565767	similar to ribosomal protein L15	311120		cytoplasmic translation; RNA binding; structural constituent of ribosome; cytosolic large ribosomal subunit
Rgn	regucalcin	25106		kidney development; liver development; negative regulation of protein phosphorylation; gluconolactonase activity; calcium ion binding; nucleus; cytoplasm; cytosol; negative regulation of protein kinase activity; cellular calcium ion homeostasis; spermatogenesis; aging; zinc ion binding; positive regulation of triglyceride biosynthetic process; positive regulation of glucose metabolic process; pos…
Rgs22	regulator of G-protein signaling 22	500853		G-protein alpha-subunit binding; nucleus; cytoplasm
Rhd	Rh blood group, D antigen	60414		integral component of plasma membrane; ammonium transmembrane transporter activity; ammonium transport; membrane; erythrocyte development; multicellular organismal iron ion homeostasis; ammonium transmembrane transport
Rln3	relaxin 3	266997		G protein-coupled receptor binding; hormone activity; extracellular region; regulation of signaling receptor activity
Rnf225	ring finger protein 225	502300		integral component of membrane
Rorc	RAR-related orphan receptor C	368158		negative regulation of transcription by RNA polymerase II; RNA polymerase II proximal promoter sequence-specific DNA binding; transcription coactivator binding; DNA-binding transcription repressor activity, RNA polymerase II-specific; molecular_function; DNA binding; DNA-binding transcription factor activity; steroid hormone receptor activity; nuclear receptor activity; cellular_component; nucleu…
RT1-T24-3	RT1 class I, locus T24, gene 3	414788		positive regulation of T cell mediated cytotoxicity; antigen processing and presentation of endogenous peptide antigen via MHC class Ib; antigen processing and presentation of endogenous peptide antigen via MHC class I via ER pathway, TAP-independent; signaling receptor binding; extracellular space; plasma membrane; immune response; external side of plasma membrane; peptide antigen binding
S100a8	S100 calcium binding protein A8	116547		leukocyte migration involved in inflammatory response; acute inflammatory response; chronic inflammatory response; positive regulation of peptide secretion; molecular_function; calcium ion binding; extracellular space; cytosol; plasma membrane; autophagy; apoptotic process; activation of cysteine-type endopeptidase activity involved in apoptotic process; inflammatory response; microtubule binding…
Sall4	spalt-like transcription factor 4	686412		negative regulation of transcription by RNA polymerase II; heterochromatin; in utero embryonic development; inner cell mass cell proliferation; neural tube closure; ventricular septum development; molecular_function; nucleic acid binding; cellular_component; nucleus; nucleoplasm; regulation of transcription, DNA-templated; heart development; transcription factor binding; biological_process; tissu…
Samd8	sterile alpha motif domain containing 8	305684		ceramide phosphoethanolamine synthase activity; endoplasmic reticulum; cytosol; integral component of plasma membrane; sphingolipid biosynthetic process; integral component of Golgi membrane; integral component of endoplasmic reticulum membrane; sphingomyelin synthase activity; ceramide biosynthetic process; ceramide cholinephosphotransferase activity; ceramide phosphoethanolamine biosynthetic pr…
Sapcd1	suppressor APC domain containing 1	406170
Sarm1	sterile alpha and TIR motif containing 1	287545		cytoplasm; mitochondrion; microtubule; signal transduction; response to glucose; positive regulation of signal transduction; microtubule cytoskeleton; dendrite; extrinsic component of mitochondrial outer membrane; negative regulation of MyD88-independent toll-like receptor signaling pathway; signaling adaptor activity; regulation of apoptotic process; synapse; response to axon injury; regulation …
Sbp	spermine binding protein	25540		extracellular space; polyamine binding; carbohydrate binding
Sbspon	somatomedin B and thrombospondin, type 1 domain containing	297757		scavenger receptor activity; immune response; vesicle-mediated transport; polysaccharide binding
Scn4b	sodium voltage-gated channel beta subunit 4	315611		voltage-gated sodium channel complex; molecular_function; voltage-gated ion channel activity; voltage-gated sodium channel activity; plasma membrane; sodium ion transport; biological_process; positive regulation of sodium ion transport; intercalated disc; sodium channel regulator activity; intrinsic component of plasma membrane; sodium ion transmembrane transport; ion channel binding; cardiac mus…
Scrn1	secernin 1	502776		nucleus; cytoplasm; proteolysis; exocytosis; dipeptidase activity; nuclear membrane
Scube1	signal peptide, CUB domain and EGF like domain containing 1	315174		calcium ion binding; extracellular space; external side of plasma membrane; cell surface; extrinsic component of plasma membrane; identical protein binding; positive regulation of smoothened signaling pathway; protein heterodimerization activity; protein homooligomerization
Sec16b	SEC16 homolog B, endoplasmic reticulum export factor	89868		Golgi membrane; endoplasmic reticulum membrane; ER to Golgi vesicle-mediated transport; endoplasmic reticulum organization; Golgi organization; peroxisome organization; positive regulation of gene expression; ER to Golgi transport vesicle membrane; protein transport; peroxisome fission; intracellular membrane-bounded organelle; COPII vesicle coating; positive regulation of protein exit from endop…
Serp2	stress-associated endoplasmic reticulum protein family member 2	498546		endoplasmic reticulum membrane; protein glycosylation; protein transport; endoplasmic reticulum unfolded protein response
Sez6	seizure related 6 homolog	192247		extracellular space; endoplasmic reticulum; adult locomotory behavior; integral component of membrane; cerebellar Purkinje cell layer development; neuronal cell body; dendritic spine; dendritic shaft; perinuclear region of cytoplasm; regulation of dendrite development; synapse maturation; excitatory postsynaptic potential; regulation of protein kinase C signaling; apical dendrite; positive regula…
Sh3tc2	SH3 domain and tetratricopeptide repeats 2	307393		plasma membrane; myelination in peripheral nervous system; cytoplasmic vesicle; peripheral nervous system myelin maintenance; regulation of intracellular protein transport; recycling endosome; regulation of ERBB signaling pathway
Shisa2	shisa family member 2	498528		endoplasmic reticulum; integral component of membrane; negative regulation of Wnt signaling pathway; negative regulation of fibroblast growth factor receptor signaling pathway
Sim1	SIM bHLH transcription factor 1	309888		DNA-binding transcription factor activity, RNA polymerase II-specific; ureteric bud development; molecular_function; DNA binding; cellular_component; nucleus; regulation of transcription, DNA-templated; regulation of transcription by RNA polymerase II; biological_process; protein heterodimerization activity
Slc12a3	solute carrier family 12 member 3	54300		cytosol; plasma membrane; sodium ion transport; chloride transport; cell volume homeostasis; sodium:potassium:chloride symporter activity; sodium ion transmembrane transporter activity; cation:chloride symporter activity; sodium:chloride symporter activity; potassium:chloride symporter activity; integral component of membrane; apical plasma membrane; enzyme binding; vesicle; sodium ion transmembr…
Slc13a2	solute carrier family 13 member 2	65202		sodium ion transport; symporter activity; integral component of membrane; transmembrane transport
Slc25a22	solute carrier family 25 member 22	309111		L-glutamate transmembrane transporter activity; mitochondrial inner membrane; L-glutamate transmembrane transport; integral component of membrane; L-aspartate transmembrane transport
Slc26a6	solute carrier family 26 member 6	301010		plasma membrane; integral component of plasma membrane; chloride transport; secondary active sulfate transmembrane transporter activity; sulfate transport; vesicle membrane; bicarbonate transmembrane transporter activity; chloride transmembrane transporter activity; sulfate transmembrane transporter activity; anion:anion antiporter activity; formate transmembrane transporter activity; efflux tran…
Slc29a4	solute carrier family 29 member 4	288499		nucleoside transmembrane transporter activity; plasma membrane; monoamine transmembrane transporter activity; monoamine transport; integral component of membrane; nucleoside transmembrane transport
Slc2a10	solute carrier family 2 member 10	366251		carbohydrate:proton symporter activity; integral component of plasma membrane; carbohydrate transmembrane transport; proton transmembrane transport
Slc2a12	solute carrier family 2 member 12	308028		carbohydrate:proton symporter activity; integral component of plasma membrane; membrane; proton transmembrane transport; glucose transmembrane transport
Slc2a9	solute carrier family 2 member 9	501925		glucose transmembrane transporter activity; nuclear envelope; plasma membrane; integral component of plasma membrane; urate transmembrane transporter activity; urate transport; integral component of membrane; transmembrane transporter activity; urate metabolic process; transmembrane transport; glucose transmembrane transport
Slc30a10	solute carrier family 30, member 10	289353		early endosome; plasma membrane; manganese ion transport; epidermal growth factor receptor signaling pathway; cation transmembrane transporter activity; integral component of membrane; negative regulation of neuron apoptotic process; recycling endosome; positive regulation of ERK1 and ERK2 cascade; manganese ion transmembrane transport; regulation of zinc ion transport; negative regulation of rea…
Slc35f1	solute carrier family 35, member F1	502421		integral component of membrane; transmembrane transporter activity; transmembrane transport
Slc40a1	solute carrier family 40 member 1	170840		lymphocyte homeostasis; endothelium development; iron ion transmembrane transporter activity; nucleoplasm; cytosol; plasma membrane; iron ion transport; cellular iron ion homeostasis; synaptic vesicle; ferrous iron transmembrane transporter activity; integral component of membrane; basolateral plasma membrane; peptide hormone binding; regulation of transcription from RNA polymerase II promoter in…
Slc43a2	solute carrier family 43 member 2	287532		plasma membrane; neutral amino acid transmembrane transporter activity; L-amino acid transmembrane transporter activity; neutral amino acid transport; L-amino acid transport; integral component of membrane; L-alpha-amino acid transmembrane transport
Slc4a8	solute carrier family 4 member 8	315311		inorganic anion exchanger activity; plasma membrane; integral component of plasma membrane; sodium ion transport; sodium:bicarbonate symporter activity; anion:anion antiporter activity; inorganic anion transport; bicarbonate transport; membrane; integral component of membrane; neuronal cell body membrane; neuron projection; regulation of intracellular pH; anion transmembrane transport
Slc5a11	solute carrier family 5 member 11	252854		glucose:sodium symporter activity; plasma membrane; sodium ion transport; apoptotic process; integral component of membrane; apical plasma membrane; transmembrane transporter activity; transmembrane transport; glucose transmembrane transport
Slc6a8	solute carrier family 6 member 8	50690		creatine transmembrane transporter activity; creatine:sodium symporter activity; neurotransmitter:sodium symporter activity; plasma membrane; sodium ion transport; choline transmembrane transporter activity; choline transport; creatine transmembrane transport; glutamatergic synapse; integral component of postsynaptic membrane; embryonic brain development
Slc9b2	solute carrier family 9 member B2	679958		mitochondrial inner membrane; plasma membrane; sodium ion transport; endosome membrane; lithium:proton antiporter activity; sodium:proton antiporter activity; integral component of membrane; basolateral plasma membrane; flagellated sperm motility; synaptic vesicle membrane; mitochondrial membrane; sodium ion transmembrane transport; identical protein binding; regulation of insulin secretion invol…
Slitrk6	SLIT and NTRK-like family, member 6	290467		startle response; lens development in camera-type eye; auditory receptor cell morphogenesis; plasma membrane; integral component of plasma membrane; axonogenesis; synapse assembly; visual perception; adult locomotory behavior; cell surface; vestibulocochlear nerve development; auditory behavior; multicellular organism growth; inner ear morphogenesis; camera-type eye development; neuron projection…
Slpi	secretory leukocyte peptidase inhibitor	84386		molecular_function; DNA binding; mRNA binding; endopeptidase inhibitor activity; serine-type endopeptidase inhibitor activity; cellular_component; extracellular region; extracellular space; immune response; negative regulation of peptidase activity; antibacterial humoral response; enzyme binding; peptidase inhibitor activity; negative regulation of protein binding; response to lipopolysaccharide;…
Smim5	small integral membrane protein 5	689926		integral component of membrane
Snai3	snail family transcriptional repressor 3	307919		negative regulation of transcription by RNA polymerase II; RNA polymerase II regulatory region sequence-specific DNA binding; RNA polymerase II proximal promoter sequence-specific DNA binding; DNA-binding transcription factor activity, RNA polymerase II-specific; DNA-binding transcription repressor activity, RNA polymerase II-specific; DNA binding; DNA-binding transcription factor activity; nucle…
Snhg11	small nucleolar RNA host gene 11	362256
Sorbs2	sorbin and SH3 domain containing 2	114901		nucleic acid binding; nucleoplasm; plasma membrane; focal adhesion; actin filament organization; Notch signaling pathway; postsynaptic density; apical plasma membrane; protein domain specific binding; lamellipodium; dendrite; neuronal cell body; synapse; perinuclear region of cytoplasm; cell growth involved in cardiac muscle cell development; acetylcholine receptor signaling pathway; regulation o…
Sp7	Sp7 transcription factor	300260		RNA polymerase II proximal promoter sequence-specific DNA binding; DNA-binding transcription factor activity, RNA polymerase II-specific; DNA-binding transcription activator activity, RNA polymerase II-specific; osteoblast differentiation; nucleic acid binding; DNA binding; nucleus; cytoplasm; regulation of transcription by RNA polymerase II; DEAD/H-box RNA helicase binding; positive regulation o…
Spaca5	sperm acrosome associated 5	314431		lysozyme activity; defense response to Gram-negative bacterium; defense response to Gram-positive bacterium
Spata17	spermatogenesis associated 17	498305
Spata20	spermatogenesis associated 20	360604		catalytic activity; extracellular region; multicellular organism development; spermatogenesis; cell differentiation
Sptbn2	spectrin, beta, non-erythrocytic 2	29211		Golgi membrane; actin binding; structural constituent of cytoskeleton; protein binding; phospholipid binding; cytoplasm; endosome; cytosol; plasma membrane; cytoskeleton organization; synapse assembly; synaptic vesicle; spectrin; synaptic vesicle exocytosis; synaptic vesicle docking; vesicle-mediated transport; apical plasma membrane; nuclear matrix; regulation of calcium ion-dependent exocytosis…
Srl	sarcalumenin	302948		store-operated calcium entry; GTP binding; response to muscle activity involved in regulation of muscle adaptation
St18	ST18 C2H2C-type zinc finger transcription factor	266680		negative regulation of transcription by RNA polymerase II; RNA polymerase II regulatory region sequence-specific DNA binding; RNA polymerase II proximal promoter sequence-specific DNA binding; DNA-binding transcription repressor activity, RNA polymerase II-specific; DNA-binding transcription activator activity, RNA polymerase II-specific; DNA binding; nucleus; regulation of transcription, DNA-tem…
Steap4	STEAP4 metalloreductase	499991		Golgi membrane; endosome; Golgi apparatus; plasma membrane; cupric reductase activity; electron transfer activity; copper ion import; integral component of membrane; heme binding; electron transport chain; early endosome membrane; fat cell differentiation; metal ion binding; ferric-chelate reductase (NADPH) activity; iron ion homeostasis; oxidation-reduction process; protein homotrimerization; FA…
Stra6	stimulated by retinoic acid 6	363071		blood vessel development; kidney development; pulmonary valve morphogenesis; ventricular septum development; plasma membrane; integral component of plasma membrane; heart development; learning; feeding behavior; retinal binding; retinol binding; lung development; adrenal gland development; female genitalia development; response to retinoic acid; protein-containing complex; retinol transmembrane t…
Stum	stum, mechanosensory transduction mediator homolog	689499		integral component of membrane
Sult1b1	sulfotransferase family 1B member 1	64305		aryl sulfotransferase activity; cytosol; ethanol catabolic process; xenobiotic metabolic process; sulfotransferase activity; steroid metabolic process; flavonoid metabolic process; phenol-containing compound metabolic process; epithelial cell differentiation; thyroid hormone metabolic process; 3'-phosphoadenosine 5'-phosphosulfate metabolic process; sulfation
Sun3	Sad1 and UNC84 domain containing 3	498412		nuclear envelope; nuclear envelope organization; integral component of membrane; meiotic nuclear membrane microtubule tethering complex; protein membrane anchor; cytoskeletal anchoring at nuclear membrane
Susd2	sushi domain containing 2	294335		scavenger receptor activity; plasma membrane; immune response; integral component of membrane; vesicle-mediated transport; polysaccharide binding; negative regulation of cell division; negative regulation of cell cycle G1/S phase transition
Syt15	synaptotagmin 15	306285		SNARE binding; phosphatidylserine binding; calcium ion binding; calcium-dependent phospholipid binding; plasma membrane; regulation of dopamine secretion; integral component of membrane; vesicle-mediated transport; calcium ion regulated exocytosis; regulation of calcium ion-dependent exocytosis; extrinsic component of membrane; clathrin binding; exocytic vesicle; cellular response to calcium ion
Syt17	synaptotagmin 17	192189		SNARE binding; phosphatidylserine binding; calcium ion binding; calcium-dependent phospholipid binding; trans-Golgi network; plasma membrane; exocytosis; regulation of dopamine secretion; membrane; synaptic vesicle exocytosis; vesicle-mediated transport; calcium ion regulated exocytosis; regulation of calcium ion-dependent exocytosis; syntaxin binding; clathrin binding; synaptic vesicle endocytos…
Syt2	synaptotagmin 2	24805		SNARE binding; phosphatidylserine binding; calcium ion binding; protein binding; calcium-dependent phospholipid binding; plasma membrane; neurotransmitter secretion; synaptic vesicle; regulation of dopamine secretion; integral component of membrane; synaptic vesicle exocytosis; vesicle-mediated transport; calcium ion regulated exocytosis; regulation of calcium ion-dependent exocytosis; syntaxin b…
Tac4	tachykinin 4	282829		negative regulation of systemic arterial blood pressure; signaling receptor binding; extracellular space; inflammatory response; positive regulation of cytosolic calcium ion concentration; tachykinin receptor signaling pathway; regulation of blood pressure; substance P receptor binding; substance K receptor binding; mast cell granule; mast cell degranulation; positive regulation of saliva secreti…
Tagln	transgelin	25123		cytoplasm; protein binding, bridging; epithelial cell differentiation; actin filament binding
Tbx18	T-box18	315870		negative regulation of transcription by RNA polymerase II; transcription regulatory region sequence-specific DNA binding; RNA polymerase II proximal promoter sequence-specific DNA binding; RNA polymerase II transcription factor binding; DNA-binding transcription repressor activity, RNA polymerase II-specific; somitogenesis; positive regulation of mesenchymal cell proliferation; sinoatrial node de…
Tcf21	transcription factor 21	252856		negative regulation of transcription by RNA polymerase II; DNA-binding transcription repressor activity, RNA polymerase II-specific; DNA-binding transcription activator activity, RNA polymerase II-specific; ureteric bud development; branching involved in ureteric bud morphogenesis; morphogenesis of a branching structure; kidney development; vasculature development; nucleus; sex determination; sex…
Tctex1d1	Tctex1 domain containing 1	362553
Terc	telomerase RNA component	378461		template for synthesis of G-rich strand of telomere DNA activity; telomere maintenance; telomerase activity; cellular_component; telomerase holoenzyme complex; telomere maintenance via telomerase; cell proliferation; post-embryonic development; multicellular organism aging; positive regulation of telomere maintenance via telomerase; regulation of cell proliferation; negative regulation of cell di…
Tex52	testis expressed 52	100362909
Tff2	trefoil factor 2	116592		structural molecule activity; extracellular space; growth factor activity; positive regulation of cell proliferation; regulation of signaling receptor activity; calcium-mediated signaling; maintenance of gastrointestinal epithelium; regulation of cell migration; CXCR4 chemokine receptor binding; negative regulation of macrophage activation; negative regulation of inflammatory response; negative r…
Tigd5	tigger transposable element derived 5	300034		DNA binding; nucleus
Tldc2	TBC/LysM-associated domain containing 2	502689		negative regulation of oxidative stress-induced neuron death
Tmco2	transmembrane and coiled-coil domains 2	100360795		integral component of membrane
Tmco3	transmembrane and coiled-coil domains 3	306607		solute:proton antiporter activity; integral component of membrane; proton transmembrane transport
Tmem120a	transmembrane protein 120A	288591		molecular_function; cellular_component; nuclear inner membrane; biological_process; integral component of membrane; fat cell differentiation; protein homooligomerization; protein heterooligomerization
Tmem158	transmembrane protein 158	117582		integral component of membrane; signaling receptor activity; peptide binding
Tmem200a	transmembrane protein 200A	498987		integral component of membrane
Tmem211	transmembrane protein 211	679783		integral component of membrane
Tmem232	transmembrane protein 232	501199		integral component of membrane
Tmem235	transmembrane protein 235	688285		cytoplasm; integral component of membrane; apical plasma membrane
Tmem37	transmembrane protein 37	245953		voltage-gated ion channel activity; calcium channel activity; integral component of membrane; regulation of ion transmembrane transport; calcium ion transmembrane transport
Tmem45b	transmembrane protein 45b	315524		integral component of membrane
Tmem86a	transmembrane protein 86A	308602		membrane; integral component of membrane; ether lipid metabolic process; alkenylglycerophosphocholine hydrolase activity; alkenylglycerophosphoethanolamine hydrolase activity
Tmem95	transmembrane protein 95	691982		integral component of membrane
Tmprss5	transmembrane serine protease 5	266681		serine-type endopeptidase activity; scavenger receptor activity; calcium ion binding; plasma membrane; proteolysis; blood coagulation; peptidase activity; integral component of membrane; vesicle-mediated transport; neuronal cell body
Tnfaip2	TNF alpha induced protein 2	299339		exocyst; SNARE binding; exocytosis; exocyst localization
Tnip1	TNFAIP3 interacting protein 1	363599		MyD88-dependent toll-like receptor signaling pathway; nucleoplasm; cytoplasm; cytosol; leukocyte cell-cell adhesion; glycoprotein biosynthetic process; polyubiquitin modification-dependent protein binding; identical protein binding; negative regulation of I-kappaB kinase/NF-kappaB signaling; positive regulation of transcription by RNA polymerase II; regulation of inflammatory response; positive r…
Tnp2	transition protein 2	24840		nuclear nucleosome; DNA binding; nucleus; nucleolus; multicellular organism development; spermatogenesis; binding of sperm to zona pellucida; acrosome reaction; penetration of zona pellucida; zinc ion binding; positive regulation of protein processing; flagellated sperm motility; spermatogenesis, exchange of chromosomal proteins; metal ion binding
Tp63	tumor protein p63	246334		negative regulation of transcription by RNA polymerase II; nuclear chromatin; DNA-binding transcription activator activity, RNA polymerase II-specific; replicative cell aging; skeletal system development; establishment of planar polarity; morphogenesis of a polarized epithelium; hair follicle development; p53 binding; positive regulation of mesenchymal cell proliferation; epithelial cell developm…
Tppp3	tubulin polymerization-promoting protein family member 3	291966		microtubule bundle formation; microtubule; tubulin binding; positive regulation of protein polymerization; microtubule polymerization; perinuclear region of cytoplasm; microtubule bundle
Tpsab1	tryptase alpha/beta 1	54271		serine-type endopeptidase activity; extracellular space; proteolysis; peptidase activity; extracellular matrix disassembly; mast cell granule; identical protein binding
Treml4	triggering receptor expressed on myeloid cells-like 4	680862		positive regulation of defense response to virus by host; T cell antigen processing and presentation; lysosomal membrane; endoplasmic reticulum; phagocytosis, engulfment; protein localization; cell surface; endosome membrane; positive regulation of toll-like receptor 7 signaling pathway; positive regulation of toll-like receptor 9 signaling pathway; positive regulation of toll-like receptor 13 si…
Trim58	tripartite motif-containing 58	303167		protein polyubiquitination; ubiquitin-dependent protein catabolic process; zinc ion binding; dynein heavy chain binding; dynein intermediate chain binding; protein autoubiquitination; ubiquitin protein ligase activity; positive regulation of erythrocyte enucleation; regulation of nuclear migration along microtubule
Trim6	tripartite motif containing 6	293294		protein polyubiquitination; positive regulation of defense response to virus by host; positive regulation of cytokine secretion involved in immune response; molecular_function; cellular_component; nucleus; cytoplasm; cytosol; transcription factor binding; biological_process; zinc ion binding; positive regulation of gene expression; negative regulation of gene expression; positive regulation of pe…
Trim72	tripartite motif containing 72	365377		plasma membrane repair; phosphatidylserine binding; muscle system process; exocytosis; muscle organ development; zinc ion binding; negative regulation of myotube differentiation; protein ubiquitination; cytoplasmic vesicle membrane; ubiquitin conjugating enzyme binding; sarcolemma; proteasome-mediated ubiquitin-dependent protein catabolic process; negative regulation of insulin-like growth factor…
Trpa1	transient receptor potential cation channel, subfamily A, member 1	312896		ion channel activity; voltage-gated calcium channel activity; calcium channel activity; protein binding; integral component of plasma membrane; calcium ion transport; cell surface receptor signaling pathway; response to cold; response to organic substance; response to organic cyclic compound; urinary bladder smooth muscle contraction; channel activity; calcium-release channel activity; apical pla…
Trpc4	transient receptor potential cation channel, subfamily C, member 4	84494		calcium channel activity; cytoplasm; plasma membrane; integral component of plasma membrane; caveola; cell-cell junction; calcium ion transport; manganese ion transport; beta-catenin binding; cell surface; gamma-aminobutyric acid secretion; store-operated calcium channel activity; integral component of membrane; basolateral plasma membrane; cortical cytoskeleton; protein-containing complex; catio…
Trpm6	transient receptor potential cation channel, subfamily M, member 6	293874		protein serine/threonine kinase activity; cation channel activity; ATP binding; cellular_component; protein phosphorylation; biological_process; response to toxic substance; integral component of membrane; apical plasma membrane; metal ion transport; brush border membrane; protein tetramerization; cation transmembrane transport
Trpm8	transient receptor potential cation channel, subfamily M, member 8	171384		ion channel activity; calcium channel activity; protein binding; plasma membrane; calcium ion transport; cellular calcium ion homeostasis; response to temperature stimulus; response to cold; external side of plasma membrane; membrane; integral component of membrane; detection of temperature stimulus; protein homodimerization activity; membrane raft; thermoception; protein homotetramerization; pro…
Tsacc	TSSK6 activating co-chaperone	361979		cytoplasm; chaperone binding
Tsku	tsukushi, small leucine rich proteoglycan	308843		extracellular space; regulation of gene expression; corpus callosum morphogenesis; lateral ventricle development; anterior commissure morphogenesis; negative regulation of Wnt signaling pathway; extracellular matrix; camera-type eye development; ciliary body morphogenesis
Tspan11	tetraspanin 11	312727		integral component of plasma membrane
Tspan18	tetraspanin 18	311210		integral component of plasma membrane
Tspan2	tetraspanin 2	64521		plasma membrane; integral component of plasma membrane; inflammatory response; brain development; astrocyte development; microglia development; myelination; myelin sheath; oligodendrocyte differentiation; axon development
Tssk5	testis-specific serine kinase 5	315095		protein serine/threonine kinase activity; ATP binding; nucleus; cytoplasm; protein phosphorylation; intracellular signal transduction
Usp2	ubiquitin specific peptidase 2	115771		negative regulation of transcription by RNA polymerase II; thiol-dependent ubiquitin-specific protease activity; protein binding; nucleus; cytoplasm; centrosome; cell cortex; ubiquitin-dependent protein catabolic process; muscle organ development; membrane; protein deubiquitination; cyclin binding; ubiquitin protein ligase binding; circadian regulation of gene expression; identical protein bindin…
UST4r	integral membrane transport protein UST4r	171397		integral component of membrane; transmembrane transporter activity; transmembrane transport
Vkorc1l1	vitamin K epoxide reductase complex, subunit 1-like 1	399684		endoplasmic reticulum; endoplasmic reticulum membrane; integral component of membrane; peptidyl-glutamic acid carboxylation; cellular response to oxidative stress; vitamin K metabolic process; vitamin-K-epoxide reductase (warfarin-sensitive) activity; quinone binding; oxidation-reduction process
Vpreb2	pre-B lymphocyte gene 2	363830		cell morphogenesis; immunoglobulin production; extracellular space; immune response; regulation of cell size; B cell proliferation; homeostasis of number of cells
Vsig4	V-set and immunoglobulin domain containing 4	312102		complement component C3b binding; integral component of membrane; negative regulation of interleukin-2 production; protein-containing complex; negative regulation of T cell proliferation; negative regulation of macrophage activation; negative regulation of complement activation, alternative pathway
Wdr63	WD repeat domain 63	292165		microtubule-based movement; ATP-dependent microtubule motor activity, plus-end-directed; inner dynein arm; inner dynein arm assembly; dynein light chain binding; dynein heavy chain binding; cilium movement involved in cell motility
Wfdc2	WAP four-disulfide core domain 2	286888		serine-type endopeptidase inhibitor activity; cysteine-type endopeptidase inhibitor activity; extracellular region; negative regulation of endopeptidase activity; aspartic-type endopeptidase inhibitor activity
Wfdc21	WAP four-disulfide core domain 21	360228		molecular_function; cellular_component; extracellular region; extracellular space; enzyme activator activity; biological_process; negative regulation of peptidase activity; peptidase inhibitor activity; response to lipopolysaccharide; response to tumor necrosis factor; positive regulation of catalytic activity; white fat cell differentiation
Wfdc3	WAP four-disulfide core domain 3	296366		extracellular region; negative regulation of peptidase activity; peptidase inhibitor activity
Wnk2	WNK lysine deficient protein kinase 2	306811		protein serine/threonine kinase activity; ATP binding; cytoplasm; cytosol; protein phosphorylation; negative regulation of cell proliferation; negative regulation of sodium ion transport; chloride channel inhibitor activity; potassium channel inhibitor activity; positive regulation of ion transmembrane transporter activity; intracellular signal transduction; protein autophosphorylation; ion homeo…
Xpnpep1	X-prolyl aminopeptidase 1	170751		aminopeptidase activity; cytoplasm; cytosol; proteolysis; bradykinin catabolic process; manganese ion binding; protein homodimerization activity; metalloaminopeptidase activity
Zc3h12a	zinc finger CCCH type containing 12A	313587		nuclear-transcribed mRNA catabolic process, endonucleolytic cleavage-dependent decay; P-body; angiogenesis; negative regulation of protein phosphorylation; positive regulation of defense response to virus by host; immune response-activating signal transduction; DNA binding; chromatin binding; RNA binding; mRNA binding; mRNA 3'-UTR binding; nuclease activity; endoribonuclease activity; exoribonucl…
Zfp2	zinc finger protein 2	497897		DNA-binding transcription factor activity; nucleus; nucleoplasm; sequence-specific DNA binding; negative regulation of transcription, DNA-templated; positive regulation of transcription, DNA-templated; positive regulation of transcription by RNA polymerase II
Zfp286a	zinc finger protein 286A	497923		nucleic acid binding; regulation of transcription, DNA-templated; metal ion binding
Zglp1	zinc finger, GATA-like protein 1	100360291		negative regulation of transcription by RNA polymerase II; DNA-binding transcription factor activity; nucleus; spermatogenesis; zinc ion binding; sequence-specific DNA binding; oocyte development
Zkscan2	zinc finger with KRAB and SCAN domains 2	368120		nucleic acid binding; DNA-binding transcription factor activity; nucleus; regulation of transcription, DNA-templated; metal ion binding
Abcg4	ATP binding cassette subfamily G member 4	300664	ABC transporters	ATP binding; plasma membrane; integral component of membrane; cholesterol efflux; ATPase activity, coupled to transmembrane movement of substances; protein homodimerization activity; protein heterodimerization activity; transmembrane transport; cellular response to leukemia inhibitory factor
Abcb1a	ATP binding cassette subfamily B member 1A	170913	ABC transporters; Bile secretion	G2/M transition of mitotic cell cycle; response to hypoxia; placenta development; protein binding; ATP binding; drug transmembrane transport; brain development; lactation; circadian rhythm; xenobiotic transmembrane transporting ATPase activity; hormone transport; cell surface; response to organic substance; response to mycotoxin; response to organic cyclic compound; response to isoquinoline alkal…
Abcb1b	ATP-binding cassette, subfamily B (MDR/TAP), member 1B	24646	ABC transporters; Bile secretion	Golgi membrane; response to hypoxia; placenta development; protein binding; ATP binding; plasma membrane; brain development; lactation; response to mycotoxin; response to ionizing radiation; establishment of endothelial blood-brain barrier; response to organic cyclic compound; integral component of membrane; apical plasma membrane; response to lipopolysaccharide; response to vitamin A; response t…
Abcb4	ATP binding cassette subfamily B member 4	24891	ABC transporters; Bile secretion	Golgi membrane; protein binding; ATP binding; nucleoplasm; cytoplasm; cytosol; plasma membrane; focal adhesion; phosphatidylcholine transporter activity; actin cytoskeleton; membrane; integral component of membrane; apical plasma membrane; clathrin-coated vesicle; positive regulation of cholesterol transport; bile acid secretion; response to drug; ATPase activity, coupled to transmembrane movemen…
Snai1	snail family transcriptional repressor 1	116490	Adherens junction	negative regulation of transcription by RNA polymerase II; RNA polymerase II regulatory region sequence-specific DNA binding; DNA-binding transcription repressor activity, RNA polymerase II-specific; osteoblast differentiation; mesoderm formation; epithelial to mesenchymal transition; epithelial to mesenchymal transition involved in endocardial cushion formation; nucleic acid binding; nucleus; pe…
Ctnna3	catenin alpha 3	361839	Adherens junction; Tight junction; Leukocyte transendothelial migration; Bacterial invasion of epithelial cells; Pathways in cancer; Endometrial cancer; Arrhythmogenic right ventricular cardiomyopathy (ARVC)	adherens junction; fascia adherens; beta-catenin binding; lamellipodium; bundle of His cell-Purkinje myocyte adhesion involved in cell communication; regulation of heart rate by cardiac conduction; cell-cell adhesion; regulation of ventricular cardiac muscle cell action potential
Hba1	hemoglobin, alpha 1	25632	African trypanosomiasis; Malaria	amyloid-beta binding; in utero embryonic development; peroxidase activity; oxygen carrier activity; iron ion binding; protein binding; hemoglobin complex; response to bacterium; oxygen transport; oxygen binding; heme binding; haptoglobin binding; haptoglobin-hemoglobin complex; response to stilbenoid; hydrogen peroxide catabolic process; organic acid binding; synapse; negative regulation of blood…
Gpt	glutamic--pyruvic transaminase	81670	Alanine, aspartate and glutamate metabolism; Metabolic pathways	L-alanine:2-oxoglutarate aminotransferase activity; cellular_component; extracellular space; cytoplasm; biological_process; biosynthetic process; pyridoxal phosphate binding; L-alanine catabolic process
Alox15	arachidonate 15-lipoxygenase	81639	Arachidonic acid metabolism; Linoleic acid metabolism; Metabolic pathways	ossification; negative regulation of adaptive immune response; arachidonate 12-lipoxygenase activity; iron ion binding; phosphatidylinositol-4,5-bisphosphate binding; cytoplasm; lipid droplet; cytosol; plasma membrane; phosphatidylethanolamine biosynthetic process; positive regulation of cell-substrate adhesion; membrane; arachidonic acid metabolic process; lipoxygenase pathway; fatty acid oxidat…
Cyp2j4	cytochrome P450, family 2, subfamily j, polypeptide 4	65210	Arachidonic acid metabolism; Linoleic acid metabolism; Metabolic pathways	retinoid metabolic process; NADPH-hemoprotein reductase activity; iron ion binding; cytoplasm; endoplasmic reticulum; organic acid metabolic process; xenobiotic metabolic process; female pregnancy; arachidonic acid epoxygenase activity; steroid hydroxylase activity; arachidonic acid 14,15-epoxygenase activity; arachidonic acid 11,12-epoxygenase activity; response to organic cyclic compound; oxido…
Alox12	arachidonate 12-lipoxygenase, 12S type	287454	Arachidonic acid metabolism; Metabolic pathways	arachidonate 12-lipoxygenase activity; iron ion binding; cytoplasm; cytosol; aging; positive regulation of gene expression; negative regulation of muscle cell apoptotic process; positive regulation of cell death; membrane; linoleate 13S-lipoxygenase activity; oxidoreductase activity, acting on single donors with incorporation of molecular oxygen, incorporation of two atoms of oxygen; hydrolase ac…
Cyp4f18	cytochrome P450, family 4, subfamily f, polypeptide 18	290623	Arachidonic acid metabolism; Metabolic pathways	monooxygenase activity; iron ion binding; endoplasmic reticulum membrane; integral component of membrane; oxidoreductase activity, acting on paired donors, with incorporation or reduction of molecular oxygen; heme binding; leukotriene B4 catabolic process; leukotriene-B4 20-monooxygenase activity; oxidation-reduction process
Ephb1	Eph receptor B1	24338	Axon guidance	angiogenesis; immunological synapse formation; protein tyrosine kinase activity; transmembrane receptor protein tyrosine kinase activity; transmembrane-ephrin receptor activity; ATP binding; cytoplasm; endoplasmic reticulum; cytosol; plasma membrane; integral component of plasma membrane; transmembrane receptor protein tyrosine kinase signaling pathway; axon guidance; axon guidance receptor activ…
Plxnb3	plexin B3	363517	Axon guidance	positive regulation of endothelial cell proliferation; semaphorin receptor complex; integral component of plasma membrane; homophilic cell adhesion via plasma membrane adhesion molecules; negative regulation of cell adhesion; regulation of cell shape; cell surface; negative regulation of lamellipodium assembly; positive regulation of neuron projection development; semaphorin receptor activity; pr…
Sema3e	semaphorin 3E	296789	Axon guidance	branching involved in blood vessel morphogenesis; neural crest cell migration; negative regulation of cell-matrix adhesion; sprouting angiogenesis; extracellular space; integral component of plasma membrane; regulation of cell shape; negative regulation of angiogenesis; semaphorin receptor binding; positive regulation of cell migration; neuropilin binding; chemorepellent activity; negative regula…
Sema6c	semaphorin 6C	29744	Axon guidance	neural crest cell migration; extracellular space; cytoplasm; integral component of plasma membrane; axon guidance; cell surface; integral component of membrane; semaphorin receptor binding; positive regulation of cell migration; negative regulation of axon extension; neuropilin binding; chemorepellent activity; negative regulation of axon extension involved in axon guidance; negative chemotaxis; …
Slit2	slit guidance ligand 2	360272	Axon guidance	metanephros development; ureteric bud development; in utero embryonic development; negative regulation of protein phosphorylation; cell migration involved in sprouting angiogenesis; negative regulation of leukocyte chemotaxis; aortic valve morphogenesis; pulmonary valve morphogenesis; follicle-stimulating hormone receptor activity; GTPase inhibitor activity; calcium ion binding; protein binding; …
Unc5a	unc-5 netrin receptor A	60629	Axon guidance	netrin receptor activity; plasma membrane; apoptotic process; axon guidance; integral component of membrane; neuron projection development; intrinsic component of plasma membrane; neuron projection membrane; neuronal cell body membrane; anterior/posterior axon guidance; netrin-activated signaling pathway; membrane raft
Unc5d	unc-5 netrin receptor D	306534	Axon guidance	netrin receptor activity; plasma membrane; apoptotic process; multicellular organism development; axon guidance; cell surface; integral component of membrane; pyramidal neuron differentiation; netrin-activated signaling pathway; cell-cell adhesion via plasma-membrane adhesion molecules; regulation of neuron migration
Elovl2	ELOVL fatty acid elongase 2	498728	Biosynthesis of unsaturated fatty acids	very long-chain fatty acid metabolic process; endoplasmic reticulum; unsaturated fatty acid biosynthetic process; fatty acid elongase activity; transferase activity, transferring acyl groups other than amino-acyl groups; fatty acid elongation, saturated fatty acid; sphingolipid biosynthetic process; integral component of endoplasmic reticulum membrane; fatty acid elongation, monounsaturated fatty…
Tnnc2	troponin C2, fast skeletal type	296369	Calcium signaling pathway	skeletal muscle contraction; actin binding; calcium ion binding; troponin complex; regulation of muscle contraction; calcium-dependent protein binding; actin filament binding
Htr5b	5-hydroxytryptamine (serotonin) receptor 5B	79247	Calcium signaling pathway; Neuroactive ligand-receptor interaction	G protein-coupled receptor activity; G protein-coupled serotonin receptor activity; integral component of plasma membrane; G protein-coupled receptor signaling pathway, coupled to cyclic nucleotide second messenger; adenylate cyclase-inhibiting serotonin receptor signaling pathway; serotonin receptor signaling pathway; chemical synaptic transmission; drug binding; membrane; dendrite; neurotransmi…
Ptgfr	prostaglandin F receptor	25652	Calcium signaling pathway; Neuroactive ligand-receptor interaction	prostaglandin F receptor activity; extracellular region; cytoplasm; plasma membrane; inflammatory response; adenylate cyclase-activating G protein-coupled receptor signaling pathway; positive regulation of cytosolic calcium ion concentration; positive regulation of cell proliferation; positive regulation of gene expression; integral component of membrane; response to estradiol; response to lipopo…
Bdkrb1	bradykinin receptor B1	81509	Calcium signaling pathway; Neuroactive ligand-receptor interaction; Complement and coagulation cascades; Regulation of actin cytoskeleton	negative regulation of protein phosphorylation; positive regulation of leukocyte migration; G protein-coupled receptor activity; bradykinin receptor activity; plasma membrane; inflammatory response; G protein-coupled receptor signaling pathway; protein kinase C-activating G protein-coupled receptor signaling pathway; response to mechanical stimulus; membrane; integral component of membrane; cell …
Drd1	dopamine receptor D1	24316	Calcium signaling pathway; Neuroactive ligand-receptor interaction; Gap junction	dopamine neurotransmitter receptor activity, coupled via Gs; temperature homeostasis; conditioned taste aversion; behavioral fear response; regulation of protein phosphorylation; positive regulation of protein phosphorylation; synaptic transmission, dopaminergic; G-protein alpha-subunit binding; response to amphetamine; G protein-coupled receptor activity; dopamine neurotransmitter receptor activ…
Grin2a	glutamate ionotropic receptor NMDA type subunit 2A	24409	Calcium signaling pathway; Neuroactive ligand-receptor interaction; Long-term potentiation; Alzheimer's disease; Amyotrophic lateral sclerosis (ALS); Systemic lupus erythematosus	action potential; startle response; response to amphetamine; ionotropic glutamate receptor activity; NMDA glutamate receptor activity; signaling receptor binding; extracellularly glutamate-gated ion channel activity; cation channel activity; calcium channel activity; protein binding; endoplasmic reticulum; plasma membrane; integral component of plasma membrane; calcium ion transport; chemical syn…
Avpr1b	arginine vasopressin receptor 1B	29462	Calcium signaling pathway; Neuroactive ligand-receptor interaction; Vascular smooth muscle contraction	regulation of systemic arterial blood pressure by vasopressin; G protein-coupled receptor activity; vasopressin receptor activity; plasma membrane; integral component of plasma membrane; G protein-coupled receptor signaling pathway; adenylate cyclase-modulating G protein-coupled receptor signaling pathway; positive regulation of cytosolic calcium ion concentration; positive regulation of glutamat…
Ednra	endothelin receptor type A	24326	Calcium signaling pathway; Neuroactive ligand-receptor interaction; Vascular smooth muscle contraction	branching involved in blood vessel morphogenesis; response to hypoxia; in utero embryonic development; histamine secretion; positive regulation of protein phosphorylation; glomerular filtration; endothelin receptor activity; adenylate cyclase-inhibiting G protein-coupled receptor signaling pathway; positive regulation of cytosolic calcium ion concentration; protein kinase C-activating G protein-c…
Atp2b4	ATPase plasma membrane Ca2+ transporting 4	29600	Calcium signaling pathway; Salivary secretion; Pancreatic secretion	neural retina development; calcium-transporting ATPase activity; calmodulin binding; ATP binding; plasma membrane; regulation of transcription by RNA polymerase II; calcium ion transport; cellular calcium ion homeostasis; spermatogenesis; negative regulation of nitric oxide mediated signal transduction; urinary bladder smooth muscle contraction; membrane; basolateral plasma membrane; sodium chann…
Myh6	myosin heavy chain 6	29556	Cardiac muscle contraction; Tight junction; Hypertrophic cardiomyopathy (HCM); Dilated cardiomyopathy; Viral myocarditis	microfilament motor activity; in utero embryonic development; stress fiber; regulation of the force of heart contraction; regulation of heart rate; calmodulin binding; ATP binding; cytoplasm; mitochondrion; muscle myosin complex; muscle contraction; striated muscle contraction; adult heart development; visceral muscle development; aging; regulation of heart contraction; regulation of blood pressu…
Cdh3	cadherin 3	116777	Cell adhesion molecules (CAMs)	cell morphogenesis; retina homeostasis; molecular_function; calcium ion binding; cytoplasm; plasma membrane; cell-cell adherens junction; cell-cell junction assembly; homophilic cell adhesion via plasma membrane adhesion molecules; cytoskeletal protein binding; cell surface; positive regulation of gene expression; positive regulation of keratinocyte proliferation; integral component of membrane; …
Cntn2	contactin 2	25356	Cell adhesion molecules (CAMs)	microtubule cytoskeleton organization; neuron migration; plasma membrane; cell-matrix adhesion; axonogenesis; axon guidance; axonal fasciculation; learning; adult walking behavior; voltage-gated potassium channel complex; cell surface; regulation of cell morphogenesis involved in differentiation; positive regulation of protein processing; cerebral cortex GABAergic interneuron migration; central n…
Nlgn3	neuroligin 3	171297	Cell adhesion molecules (CAMs)	regulation of respiratory gaseous exchange by neurological system process; integral component of plasma membrane; receptor-mediated endocytosis; cell adhesion; neuron cell-cell adhesion; synapse assembly; learning; visual learning; cell surface; cell junction; endocytic vesicle; dendrite; adult behavior; social behavior; signaling receptor activity; neurexin family protein binding; neuronal cell …
Cldn11	claudin 11	84588	Cell adhesion molecules (CAMs); Tight junction; Leukocyte transendothelial migration; Hepatitis C	structural molecule activity; plasma membrane; bicellular tight junction; cell adhesion; spermatogenesis; axon ensheathment; integral component of membrane; calcium-independent cell-cell adhesion via plasma membrane cell-adhesion molecules; identical protein binding; basal part of cell
Cdkn2b	cyclin-dependent kinase inhibitor 2B	25164	Cell cycle; TGF-beta signaling pathway; Pathways in cancer; Small cell lung cancer	regulation of cyclin-dependent protein serine/threonine kinase activity; G2/M transition of mitotic cell cycle; liver development; molecular_function; cyclin-dependent protein serine/threonine kinase inhibitor activity; nucleus; cytoplasm; cell cycle arrest; mitotic cell cycle checkpoint; aging; negative regulation of cell proliferation; response to organic cyclic compound; protein kinase binding…
Nfkbia	NFKB inhibitor alpha	25493	Chemokine signaling pathway; Apoptosis; Osteoclast differentiation; Toll-like receptor signaling pathway; NOD-like receptor signaling pathway; RIG-I-like receptor signaling pathway; Cytosolic DNA-sensing pathway; T cell receptor signaling pathway; B cell receptor signaling pathway; Neurotrophin signaling pathway; Adipocytokine signaling pathway; Leishmaniasis; Chagas disease (American trypanosomi…	nucleus; cytoplasm; cytosol; plasma membrane; protein import into nucleus; I-kappaB kinase/NF-kappaB signaling; cytoplasmic sequestering of NF-kappaB; nuclear localization sequence binding; regulation of gene expression; negative regulation of macrophage derived foam cell differentiation; positive regulation of cholesterol efflux; negative regulation of lipid storage; enzyme binding; heat shock p…
Cry1	cryptochrome circadian regulator 1	299691	Circadian rhythm	negative regulation of transcription by RNA polymerase II; nucleotide binding; double-stranded DNA binding; nucleus; mitochondrion; gluconeogenesis; DNA damage induced protein phosphorylation; circadian rhythm; transcription factor binding; response to light stimulus; photoreceptor activity; response to activity; protein-chromophore linkage; kinase binding; protein kinase binding; phosphatase bin…
Nr1d1	nuclear receptor subfamily 1, group D, member 1	252917	Circadian rhythm	negative regulation of transcription by RNA polymerase II; nuclear chromatin; transcription regulatory region sequence-specific DNA binding; RNA polymerase II regulatory region sequence-specific DNA binding; RNA polymerase II proximal promoter sequence-specific DNA binding; DNA-binding transcription factor activity, RNA polymerase II-specific; transcription corepressor binding; DNA-binding transc…
Per2	period circadian regulator 2	63840	Circadian rhythm	negative regulation of transcription by RNA polymerase II; transcription regulatory region sequence-specific DNA binding; RNA polymerase II distal enhancer sequence-specific DNA binding; transcription corepressor binding; response to ischemia; transcription coactivator activity; protein binding; nucleus; cytoplasm; glycogen biosynthetic process; gluconeogenesis; fatty acid metabolic process; circ…
Idh1	isocitrate dehydrogenase (NADP(+)) 1, cytosolic	24479	Citrate cycle (TCA cycle); Glutathione metabolism; Metabolic pathways; Peroxisome	magnesium ion binding; isocitrate dehydrogenase activity; isocitrate dehydrogenase (NADP+) activity; signaling receptor binding; cytoplasm; mitochondrion; peroxisome; cytosol; glyoxylate cycle; tricarboxylic acid cycle; isocitrate metabolic process; 2-oxoglutarate metabolic process; NADP metabolic process; glutathione metabolic process; response to oxidative stress; female gonad development; resp…
Mdh2	malate dehydrogenase 2	81829	Citrate cycle (TCA cycle); Pyruvate metabolism; Glyoxylate and dicarboxylate metabolism; Metabolic pathways	protein binding; cytoplasm; mitochondrion; mitochondrial matrix; carbohydrate metabolic process; tricarboxylic acid cycle; oxaloacetate metabolic process; malate metabolic process; internal protein amino acid acetylation; NADH metabolic process; aerobic respiration; membrane; malate dehydrogenase activity; L-malate dehydrogenase activity; protein homodimerization activity; protein self-associatio…
F10	coagulation factor X	29243	Complement and coagulation cascades	molecular_function; serine-type endopeptidase activity; calcium ion binding; phospholipid binding; extracellular region; extracellular space; endoplasmic reticulum; proteolysis; blood coagulation; membrane; intracellular membrane-bounded organelle; positive regulation of protein kinase B signaling
F13b	coagulation factor XIII B chain	289055	Complement and coagulation cascades	molecular_function; cellular_component; blood coagulation; biological_process; negative regulation of cellular protein catabolic process
Gba3	glucosylceramidase beta 3	289687	Cyanoamino acid metabolism; Starch and sucrose metabolism	galactosylceramidase activity; glucosylceramidase activity; beta-galactosidase activity; cytosol; carbohydrate metabolic process; glucosylceramide catabolic process; galactosylceramide catabolic process; beta-glucosidase activity; glycoside catabolic process; glycosylceramidase activity; protein stabilization; cellular oligosaccharide catabolic process; beta-glucoside catabolic process; catalytic…
Ahcyl2	adenosylhomocysteinase-like 2	312192	Cysteine and methionine metabolism; Metabolic pathways	cytosol; one-carbon metabolic process; S-adenosylmethionine cycle; neuron projection; intracellular membrane-bounded organelle
Tnfrsf19	TNF receptor superfamily member 19	290300	Cytokine-cytokine receptor interaction	hair follicle development; plasma membrane; integral component of membrane; signaling receptor activity; positive regulation of I-kappaB kinase/NF-kappaB signaling; positive regulation of JNK cascade
Ccr3	C-C motif chemokine receptor 3	117027	Cytokine-cytokine receptor interaction; Chemokine signaling pathway	positive regulation of endothelial cell proliferation; mast cell chemotaxis; chemokine receptor activity; extracellular space; cytoplasm; endosome; plasma membrane; chemotaxis; inflammatory response; immune response; G protein-coupled receptor signaling pathway; positive regulation of cytosolic calcium ion concentration; external side of plasma membrane; integral component of membrane; C-C chemok…
Cxcr2	C-X-C motif chemokine receptor 2	29385	Cytokine-cytokine receptor interaction; Chemokine signaling pathway; Endocytosis	acute inflammatory response to antigenic stimulus; positive regulation of leukocyte chemotaxis; molecular_function; interleukin-8 receptor activity; G protein-coupled receptor activity; chemokine receptor activity; cellular_component; chemotaxis; immune response; cellular defense response; cell surface receptor signaling pathway; G protein-coupled receptor signaling pathway; phospholipase C-activ…
Ccr10	C-C motif chemokine receptor 10	363682	Cytokine-cytokine receptor interaction; Chemokine signaling pathway; Intestinal immune network for IgA production	chemokine receptor activity; endoplasmic reticulum; chemotaxis; immune response; G protein-coupled receptor signaling pathway; positive regulation of cytosolic calcium ion concentration; external side of plasma membrane; cell surface; integral component of membrane; C-C chemokine receptor activity; calcium-mediated signaling; chemokine binding; C-C chemokine binding; cell chemotaxis; chemokine-me…
Cxcl2	C-X-C motif chemokine ligand 2	114105	Cytokine-cytokine receptor interaction; Chemokine signaling pathway; NOD-like receptor signaling pathway	response to amphetamine; response to molecule of bacterial origin; extracellular space; cell; inflammatory response; immune response; positive regulation of cytosolic calcium ion concentration; chemokine activity; response to heat; response to gamma radiation; regulation of signaling receptor activity; neutrophil chemotaxis; leukocyte chemotaxis; response to estradiol; wound healing; response to …
Tnfrsf17	TNF receptor superfamily member 17	287034	Cytokine-cytokine receptor interaction; Intestinal immune network for IgA production	lymphocyte homeostasis; molecular_function; cellular_component; signal transduction; biological_process; integral component of membrane; signaling receptor activity
Il4r	interleukin 4 receptor	25084	Cytokine-cytokine receptor interaction; Jak-STAT signaling pathway; Hematopoietic cell lineage	production of molecular mediator involved in inflammatory response; positive regulation of immunoglobulin production; molecular_function; cytokine receptor activity; extracellular space; plasma membrane; inflammatory response; immune response; integral component of membrane; immunoglobulin mediated immune response; cytokine-mediated signaling pathway; ovulation; regulation of cell proliferation; …
Il10	interleukin 10	25325	Cytokine-cytokine receptor interaction; Jak-STAT signaling pathway; T cell receptor signaling pathway; Intestinal immune network for IgA production; Leishmaniasis; Chagas disease (American trypanosomiasis); African trypanosomiasis; Malaria; Toxoplasmosis; Amoebiasis; Staphylococcus aureus infection; Asthma; Autoimmune thyroid disease; Systemic lupus erythematosus; Allograft rejection	negative regulation of cytokine production; positive regulation of endothelial cell proliferation; response to molecule of bacterial origin; negative regulation of cytokine secretion involved in immune response; negative regulation of chronic inflammatory response to antigenic stimulus; positive regulation of B cell apoptotic process; cytokine activity; interleukin-10 receptor binding; extracellu…
Vegfd	vascular endothelial growth factor D	360457	Cytokine-cytokine receptor interaction; mTOR signaling pathway; Focal adhesion; Pathways in cancer; Renal cell carcinoma; Pancreatic cancer; Bladder cancer	angiogenesis; response to hypoxia; positive regulation of protein phosphorylation; positive regulation of endothelial cell proliferation; sprouting angiogenesis; vascular endothelial growth factor receptor binding; extracellular region; extracellular space; growth factor activity; cell proliferation; positive regulation of cell proliferation; response to bacterium; regulation of signaling recepto…
Cyp2d1	cytochrome P450, family 2, subfamily d, polypeptide 1	266684	Drug metabolism - cytochrome P450	monooxygenase activity; iron ion binding; cytoplasm; mitochondrion; endoplasmic reticulum membrane; organic acid metabolic process; xenobiotic metabolic process; steroid hydroxylase activity; response to organic substance; response to organic cyclic compound; integral component of membrane; oxidoreductase activity, acting on paired donors, with incorporation or reduction of molecular oxygen, redu…
Cyp2d3	cytochrome P450, family 2, subfamily d, polypeptide 3	24303	Drug metabolism - cytochrome P450	liver development; monooxygenase activity; iron ion binding; cellular_component; cytoplasm; endoplasmic reticulum membrane; organic acid metabolic process; xenobiotic metabolic process; steroid hydroxylase activity; integral component of membrane; oxidoreductase activity, acting on paired donors, with incorporation or reduction of molecular oxygen, reduced flavin or flavoprotein as one donor, and…
Cyp2d4	cytochrome P450, family 2, subfamily d, polypeptide 4	171522	Drug metabolism - cytochrome P450	monooxygenase activity; iron ion binding; cytoplasm; mitochondrion; endoplasmic reticulum membrane; organic acid metabolic process; serotonin biosynthetic process from tryptophan; xenobiotic metabolic process; female pregnancy; drug binding; steroid metabolic process; C21-steroid hormone metabolic process; arachidonic acid monooxygenase activity; steroid hydroxylase activity; coumarin metabolic p…
Cyp2d5	cytochrome P450, family 2, subfamily d, polypeptide 5	286963	Drug metabolism - cytochrome P450	monooxygenase activity; iron ion binding; cytoplasm; endoplasmic reticulum membrane; organic acid metabolic process; xenobiotic metabolic process; steroid hydroxylase activity; integral component of membrane; oxidoreductase activity, acting on paired donors, with incorporation or reduction of molecular oxygen, reduced flavin or flavoprotein as one donor, and incorporation of one atom of oxygen; a…
Fmo5	flavin containing monooxygenase 5	246248	Drug metabolism - cytochrome P450	monooxygenase activity; N,N-dimethylaniline monooxygenase activity; endoplasmic reticulum; endoplasmic reticulum membrane; cytosol; integral component of membrane; flavin adenine dinucleotide binding; NADP binding; oxidation-reduction process
Ces2h	carboxylesterase 2H	498940	Drug metabolism - other enzymes	molecular_function; cellular_component; extracellular space; prostaglandin metabolic process; response to organic substance; carboxylic ester hydrolase activity
Areg	amphiregulin	29183	ErbB signaling pathway	cytokine activity; epidermal growth factor receptor binding; extracellular space; nucleus; cytoplasm; epidermal growth factor receptor signaling pathway; G protein-coupled receptor signaling pathway; central nervous system development; growth factor activity; positive regulation of cell proliferation; cell surface; regulation of signaling receptor activity; glial cell proliferation; response to o…
Pak7	p21 (RAC1) activated kinase 7	311450	ErbB signaling pathway; Axon guidance; Focal adhesion; T cell receptor signaling pathway; Regulation of actin cytoskeleton; Renal cell carcinoma	protein serine/threonine kinase activity; ATP binding; nucleoplasm; cytoplasm; mitochondrion; apoptotic process; cytoskeleton organization; learning; memory; locomotory behavior; cell migration; signal transduction by protein phosphorylation; stress-activated protein kinase signaling cascade; activation of protein kinase activity; regulation of MAPK cascade; synapse; Rac GTPase binding; negative …
Camk2b	calcium/calmodulin-dependent protein kinase II beta	24245	ErbB signaling pathway; Calcium signaling pathway; Oocyte meiosis; Wnt signaling pathway; Long-term potentiation; Neurotrophin signaling pathway; Olfactory transduction; GnRH signaling pathway; Melanogenesis; Gastric acid secretion; Glioma	G1/S transition of mitotic cell cycle; inhibitory G protein-coupled receptor phosphorylation; protein serine/threonine kinase activity; calmodulin-dependent protein kinase activity; protein binding; calmodulin binding; ATP binding; cytoplasm; microtubule organizing center; cytosol; protein phosphorylation; calcium ion transport; positive regulation of neuron projection development; postsynaptic d…
Apob	apolipoprotein B	54225	Fat digestion and absorption; Vitamin digestion and absorption	in utero embryonic development; signaling receptor binding; lipid transporter activity; protein binding; phospholipid binding; extracellular space; cytoplasm; endoplasmic reticulum; cytosol; lipid metabolic process; triglyceride mobilization; lipid transport; spermatogenesis; nervous system development; heparin binding; cholesterol metabolic process; fertilization; response to virus; response to …
Acox1	acyl-CoA oxidase 1	50681	Fatty acid degradation; alpha-Linolenic acid metabolism; Biosynthesis of unsaturated fatty acids; Metabolic pathways; PPAR signaling pathway; Peroxisome	very long-chain fatty acid metabolic process; acyl-CoA oxidase activity; signaling receptor binding; fatty acid binding; nucleus; nucleoplasm; nucleolus; cytoplasm; peroxisome; peroxisomal membrane; peroxisomal matrix; plasma membrane; generation of precursor metabolites and energy; lipid metabolic process; fatty acid beta-oxidation; prostaglandin metabolic process; spermatogenesis; palmitoyl-CoA…
Acsl5	acyl-CoA synthetase long-chain family member 5	94340	Fatty acid degradation; Metabolic pathways; PPAR signaling pathway; Peroxisome; Adipocytokine signaling pathway	long-chain fatty acid metabolic process; catalytic activity; acyl-CoA ligase activity; long-chain fatty acid-CoA ligase activity; ATP binding; nucleus; nucleolus; mitochondrion; mitochondrial outer membrane; endoplasmic reticulum; endoplasmic reticulum membrane; fatty acid metabolic process; response to nutrient; phospholipid biosynthetic process; response to sucrose; response to glucose; positiv…
Acadm	acyl-CoA dehydrogenase medium chain	24158	Fatty acid degradation; Valine, leucine and isoleucine degradation; beta-Alanine metabolism; Propanoate metabolism; Metabolic pathways; PPAR signaling pathway	fatty-acyl-CoA binding; liver development; acyl-CoA dehydrogenase activity; mitochondrion; mitochondrial matrix; glycogen biosynthetic process; organic acid metabolic process; regulation of gluconeogenesis; fatty acid beta-oxidation; heart development; response to nutrient; response to cold; carnitine metabolic process; response to hormone; post-embryonic development; nuclear speck; isomerase act…
Fcer1a	Fc fragment of IgE receptor Ia	25047	Fc epsilon RI signaling pathway; Asthma	activation of MAPK activity; positive regulation of type I hypersensitivity; serotonin secretion; extracellular region; plasma membrane; integral component of plasma membrane; immune response; signal transduction; cell surface receptor signaling pathway; activation of JUN kinase activity; external side of plasma membrane; cell surface; integral component of membrane; leukotriene biosynthetic proc…
Ibsp	integrin-binding sialoprotein	24477	Focal adhesion; ECM-receptor interaction	ossification; integrin binding; extracellular region; extracellular space; cell adhesion; integrin-mediated signaling pathway; extracellular matrix organization; bone mineralization; extracellular matrix; biomineral tissue development; vesicle; positive regulation of cell adhesion; cellular response to growth factor stimulus
Itga7	integrin subunit alpha 7	81008	Focal adhesion; ECM-receptor interaction; Regulation of actin cytoskeleton; Hypertrophic cardiomyopathy (HCM); Arrhythmogenic right ventricular cardiomyopathy (ARVC); Dilated cardiomyopathy	integrin binding; protein binding; cytoplasm; muscle tendon junction; cell adhesion; integrin-mediated signaling pathway; skeletal muscle tissue development; integrin complex; regulation of cell shape; cell surface; cell migration; neuromuscular junction; heterotypic cell-cell adhesion; integrin alpha7-beta1 complex; endodermal cell differentiation; sarcolemma; laminin binding; metal ion binding;…
Lamb3	laminin subunit beta 3	305078	Focal adhesion; ECM-receptor interaction; Toxoplasmosis; Amoebiasis; Pathways in cancer; Small cell lung cancer	extracellular matrix structural constituent; cellular_component; basement membrane; laminin-5 complex; biological_process; animal organ morphogenesis; tissue development; cell migration; substrate adhesion-dependent cell spreading; endodermal cell differentiation; laminin complex; protein-containing complex binding; brown fat cell differentiation; basement membrane assembly
Alpl	alkaline phosphatase, biomineralization associated	25586	Folate biosynthesis; Metabolic pathways	endochondral ossification; developmental process involved in reproduction; alkaline phosphatase activity; extracellular space; plasma membrane; dephosphorylation; pyrophosphatase activity; extracellular matrix; anchored component of membrane; response to lipopolysaccharide; response to vitamin D; response to antibiotic; metal ion binding; response to glucocorticoid; extracellular membrane-bounded…
Alpp	alkaline phosphatase, placental	100359675	Folate biosynthesis; Metabolic pathways	alkaline phosphatase activity; plasma membrane; cell surface; dephosphorylation; myofibril
Sord	sorbitol dehydrogenase	24788	Fructose and mannose metabolism; Metabolic pathways	L-iditol 2-dehydrogenase activity; cellular_component; mitochondrion; sorbitol metabolic process; sorbitol catabolic process; response to osmotic stress; zinc ion binding; response to hormone; membrane; flagellated sperm motility; motile cilium; response to nutrient levels; mitochondrial membrane; response to drug; identical protein binding; fructose biosynthetic process; response to cadmium ion;…
Slc26a7	solute carrier family 26 member 7	297910	Gastric acid secretion	gastric acid secretion; anion channel activity; chloride channel activity; cytoplasm; endosome; integral component of plasma membrane; anion transport; chloride transport; secondary active sulfate transmembrane transporter activity; sulfate transport; bicarbonate transmembrane transporter activity; chloride transmembrane transporter activity; sulfate transmembrane transporter activity; anion:anio…
Anpep	alanyl aminopeptidase, membrane	81641	Glutathione metabolism; Metabolic pathways; Renin-angiotensin system; Hematopoietic cell lineage	angiogenesis; aminopeptidase activity; extracellular space; cytoplasm; endoplasmic reticulum-Golgi intermediate compartment; plasma membrane; proteolysis; metallopeptidase activity; zinc ion binding; external side of plasma membrane; integral component of membrane; cell differentiation; brush border membrane; negative regulation of renal sodium excretion; peptide binding; peptide catabolic proces…
Gsta4	glutathione S-transferase alpha 4	300850	Glutathione metabolism; Metabolism of xenobiotics by cytochrome P450; Drug metabolism - cytochrome P450	glutathione transferase activity; cytoplasm; mitochondrion; glutathione metabolic process; xenobiotic metabolic process; drug binding; response to herbicide; response to zinc ion; response to nicotine; identical protein binding; protein homodimerization activity; glutathione binding; cellular response to lithium ion
Gpat3	glycerol-3-phosphate acyltransferase 3	305166	Glycerolipid metabolism; Glycerophospholipid metabolism; Metabolic pathways	1-acylglycerol-3-phosphate O-acyltransferase activity; glycerol-3-phosphate O-acyltransferase activity; endoplasmic reticulum; endoplasmic reticulum membrane; integral component of membrane; CDP-diacylglycerol biosynthetic process; triglyceride biosynthetic process; regulation of TOR signaling; sn-1-glycerol-3-phosphate C16:0-DCA-CoA acyl transferase activity
Dgka	diacylglycerol kinase, alpha	140866	Glycerolipid metabolism; Glycerophospholipid metabolism; Metabolic pathways; Phosphatidylinositol signaling system	NAD+ kinase activity; diacylglycerol kinase activity; calcium ion binding; ATP binding; phospholipid binding; cytosol; plasma membrane; phosphatidic acid biosynthetic process; protein kinase C-activating G protein-coupled receptor signaling pathway; kinase activity; intracellular signal transduction; diacylglycerol metabolic process; glycerolipid metabolic process; lipid phosphorylation
Lipc	lipase C, hepatic type	24538	Glycerolipid metabolism; Metabolic pathways	response to hypoxia; liver development; lipoprotein lipase activity; phospholipase activity; lysophospholipase activity; triglyceride lipase activity; extracellular region; extracellular space; early endosome; late endosome; microvillus; lipid metabolic process; fatty acid metabolic process; fatty acid biosynthetic process; triglyceride metabolic process; phosphatidylserine metabolic process; cir…
Dgat1	diacylglycerol O-acyltransferase 1	84497	Glycerolipid metabolism; Retinol metabolism; Metabolic pathways; Fat digestion and absorption	2-acylglycerol O-acyltransferase activity; diacylglycerol O-acyltransferase activity; fatty acid binding; endoplasmic reticulum membrane; plasma membrane; positive regulation of triglyceride biosynthetic process; membrane; integral component of membrane; transferase activity, transferring acyl groups; triglyceride biosynthetic process; lipid storage; diacylglycerol binding; insulin secretion; ver…
Ache	acetylcholinesterase	83817	Glycerophospholipid metabolism	acetylcholine catabolic process in synaptic cleft; regulation of receptor recycling; osteoblast development; acetylcholinesterase activity; cholinesterase activity; collagen binding; extracellular region; basement membrane; extracellular space; nuclear envelope; cytoplasm; endoplasmic reticulum lumen; rough endoplasmic reticulum; Golgi apparatus; plasma membrane; acetylcholine catabolic process; …
Gpd1	glycerol-3-phosphate dehydrogenase 1	60666	Glycerophospholipid metabolism	glycerol-3-phosphate dehydrogenase [NAD+] activity; glycerol-3-phosphate dehydrogenase (quinone) activity; cytosol; carbohydrate metabolic process; glycerol-3-phosphate metabolic process; gluconeogenesis; NADH oxidation; glycerophosphate shuttle; NADH metabolic process; glycerol-3-phosphate dehydrogenase complex; protein homodimerization activity; positive regulation of glycolytic process; glycer…
Pla2g12b	phospholipase A2, group XIIB	367415	Glycerophospholipid metabolism; Ether lipid metabolism; Arachidonic acid metabolism; Linoleic acid metabolism; alpha-Linolenic acid metabolism; Metabolic pathways; MAPK signaling pathway; Vascular smooth muscle contraction; VEGF signaling pathway; Fc epsilon RI signaling pathway; Long-term depression; GnRH signaling pathway; Pancreatic secretion; Fat digestion and absorption; Toxoplasmosis	phospholipase A2 activity; calcium ion binding; extracellular region; phospholipid metabolic process; lipid catabolic process; cholesterol homeostasis; arachidonic acid secretion; triglyceride homeostasis
Pla2g5	phospholipase A2, group V	29354	Glycerophospholipid metabolism; Ether lipid metabolism; Arachidonic acid metabolism; Linoleic acid metabolism; alpha-Linolenic acid metabolism; Metabolic pathways; MAPK signaling pathway; Vascular smooth muscle contraction; VEGF signaling pathway; Fc epsilon RI signaling pathway; Long-term depression; GnRH signaling pathway; Pancreatic secretion; Fat digestion and absorption; Toxoplasmosis	phospholipase A2 activity; signaling receptor binding; calcium ion binding; phospholipid binding; extracellular region; Golgi apparatus; plasma membrane; phospholipid metabolic process; platelet activating factor biosynthetic process; heparin binding; cell surface; positive regulation of phospholipase activity; lipid catabolic process; leukotriene biosynthetic process; response to cytokine; low-d…
Chdh	choline dehydrogenase	290551	Glycine, serine and threonine metabolism	mitochondrial inner membrane; choline dehydrogenase activity; glycine betaine biosynthetic process from choline; flavin adenine dinucleotide binding; oxidation-reduction process
Alas2	5'-aminolevulinate synthase 2	25748	Glycine, serine and threonine metabolism; Porphyrin and chlorophyll metabolism; Metabolic pathways	response to hypoxia; 5-aminolevulinate synthase activity; mitochondrion; mitochondrial inner membrane; mitochondrial matrix; protoporphyrinogen IX biosynthetic process; heme biosynthetic process; cellular iron ion homeostasis; lactation; response to lead ion; glycine binding; pyridoxal phosphate binding; erythrocyte differentiation; response to cobalt ion; response to drug; hemoglobin biosyntheti…
Aldh3a2	aldehyde dehydrogenase 3 family, member A2	65183	Glycolysis / Gluconeogenesis; Pentose and glucuronate interconversions; Ascorbate and aldarate metabolism; Fatty acid degradation; Valine, leucine and isoleucine degradation; Lysine degradation; Arginine and proline metabolism; Histidine metabolism; Tryptophan metabolism; beta-Alanine metabolism; Glycerolipid metabolism; Pyruvate metabolism; Propanoate metabolism; Metabolic pathways	response to reactive oxygen species; 3-chloroallyl aldehyde dehydrogenase activity; aldehyde dehydrogenase (NAD) activity; nucleus; peroxisome; endoplasmic reticulum; cytosol; cellular aldehyde metabolic process; fatty acid metabolic process; sesquiterpenoid metabolic process; central nervous system development; peripheral nervous system development; epidermis development; integral component of m…
Aldob	aldolase, fructose-bisphosphate B	24190	Glycolysis / Gluconeogenesis; Pentose phosphate pathway; Fructose and mannose metabolism; Metabolic pathways	liver development; fructose-bisphosphate aldolase activity; nucleus; cytoplasm; lysosome; microtubule organizing center; cytosol; plasma membrane; fructose metabolic process; glycolytic process; NADH oxidation; cytoskeletal protein binding; response to carbohydrate; response to fructose; response to zinc ion; response to organic cyclic compound; fructose 1,6-bisphosphate metabolic process; rough …
Pklr	pyruvate kinase L/R	24651	Glycolysis / Gluconeogenesis; Purine metabolism; Pyruvate metabolism; Metabolic pathways; Insulin signaling pathway; Type II diabetes mellitus; Maturity onset diabetes of the young	magnesium ion binding; response to hypoxia; pyruvate kinase activity; ATP binding; cytoplasm; cytosol; carbohydrate metabolic process; glycolytic process; ATP biosynthetic process; response to nutrient; response to heat; response to glucose; response to metal ion; response to lithium ion; kinase activity; potassium ion binding; cellular response to insulin stimulus; response to ATP; pyruvate bios…
B3gat1	beta-1,3-glucuronyltransferase 1	117108	Glycosaminoglycan biosynthesis - chondroitin sulfate / dermatan sulfate; Glycosaminoglycan biosynthesis - heparan sulfate / heparin; Metabolic pathways	Golgi membrane; protein binding; extracellular region; endoplasmic reticulum membrane; Golgi lumen; protein glycosylation; UDP-galactose:beta-N-acetylglucosamine beta-1,3-galactosyltransferase activity; galactosylgalactosylxylosylprotein 3-beta-glucuronosyltransferase activity; integral component of membrane; intracellular membrane-bounded organelle; metal ion binding; chondroitin sulfate proteog…
B3gnt3	UDP-GlcNAc:betaGal beta-1,3-N-acetylglucosaminyltransferase 3	290638	Glycosphingolipid biosynthesis - lacto and neolacto series; Metabolic pathways	Golgi membrane; endoplasmic reticulum; Golgi apparatus; protein glycosylation; acetylgalactosaminyltransferase activity; galactosyltransferase activity; N-acetyllactosaminide beta-1,3-N-acetylglucosaminyltransferase activity; integral component of membrane; poly-N-acetyllactosamine biosynthetic process
B3gnt4	UDP-GlcNAc:betaGal beta-1,3-N-acetylglucosaminyltransferase 4	288752	Glycosphingolipid biosynthesis - lacto and neolacto series; Metabolic pathways	Golgi membrane; endoplasmic reticulum; Golgi apparatus; protein glycosylation; acetylgalactosaminyltransferase activity; galactosyltransferase activity; N-acetyllactosaminide beta-1,3-N-acetylglucosaminyltransferase activity; integral component of membrane; poly-N-acetyllactosamine biosynthetic process
Ptch1	patched 1	89830	Hedgehog signaling pathway; Pathways in cancer; Basal cell carcinoma	negative regulation of transcription by RNA polymerase II; branching involved in ureteric bud morphogenesis; in utero embryonic development; cell fate determination; neural tube formation; neural tube closure; heart morphogenesis; molecular_function; patched binding; smoothened binding; nucleus; Golgi apparatus; plasma membrane; caveola; cilium; signal transduction; smoothened signaling pathway; …
Bmp8b	bone morphogenetic protein 8b	679119	Hedgehog signaling pathway; TGF-beta signaling pathway	diet induced thermogenesis; cytokine activity; transforming growth factor beta receptor binding; extracellular space; germ cell development; spermatogenesis; growth factor activity; regulation of signaling receptor activity; positive regulation of pathway-restricted SMAD protein phosphorylation; BMP signaling pathway; regulation of apoptotic process; regulation of MAPK cascade; cell development; …
Il13ra2	interleukin 13 receptor subunit alpha 2	171060	Jak-STAT signaling pathway	negative regulation of immunoglobulin production; cytokine receptor activity; cellular_component; external side of plasma membrane; integral component of membrane; immunoglobulin mediated immune response; cytokine-mediated signaling pathway; cytokine binding; receptor complex; negative regulation of mast cell degranulation; cellular response to mechanical stimulus
Ezr	ezrin	54319	Leukocyte transendothelial migration; Regulation of actin cytoskeleton; Gastric acid secretion	negative regulation of transcription by RNA polymerase II; fibrillar center; ruffle; immunological synapse; uropod; intestinal D-glucose absorption; sphingosine-1-phosphate receptor signaling pathway; actin binding; structural molecule activity; protein binding; cytoplasm; endosome; cytosol; cytoskeleton; actin filament; plasma membrane; microvillus; brush border; focal adhesion; cell cortex; leu…
Bbox1	gamma-butyrobetaine hydroxylase 1	64564	Lysine degradation	iron ion binding; mitochondrion; zinc ion binding; gamma-butyrobetaine dioxygenase activity; oxidoreductase activity, acting on single donors with incorporation of molecular oxygen, incorporation of two atoms of oxygen; identical protein binding; carnitine biosynthetic process; oxidation-reduction process
Slc11a2	solute carrier family 11 member 2	25715	Lysosome	transition metal ion transport; response to hypoxia; detection of oxygen; copper ion transmembrane transporter activity; iron ion transmembrane transporter activity; manganese ion transmembrane transporter activity; zinc ion transmembrane transporter activity; iron ion binding; copper ion binding; nucleus; cytoplasm; mitochondrion; mitochondrial outer membrane; lysosome; lysosomal membrane; endos…
Dusp1	dual specificity phosphatase 1	114856	MAPK signaling pathway	inactivation of MAPK activity; protein serine/threonine phosphatase activity; protein tyrosine phosphatase activity; nucleus; cytoplasm; protein dephosphorylation; negative regulation of cell adhesion; protein tyrosine/serine/threonine phosphatase activity; negative regulation of cell proliferation; protein tyrosine/threonine phosphatase activity; response to light stimulus; response to organic s…
Dusp10	dual specificity phosphatase 10	63995	MAPK signaling pathway	inactivation of MAPK activity; regulation of adaptive immune response; molecular_function; protein tyrosine phosphatase activity; cellular_component; nucleus; nucleoplasm; cytoplasm; Golgi apparatus; cytosol; protein dephosphorylation; protein tyrosine/serine/threonine phosphatase activity; protein tyrosine/threonine phosphatase activity; JUN kinase binding; response to organic substance; negativ…
Dusp9	dual specificity phosphatase 9	293847	MAPK signaling pathway	inactivation of MAPK activity; protein tyrosine phosphatase activity; cytoplasm; cytosol; protein dephosphorylation; protein tyrosine/serine/threonine phosphatase activity; MAP kinase tyrosine/serine/threonine phosphatase activity; peptidyl-tyrosine dephosphorylation
Cacng6	calcium voltage-gated channel auxiliary subunit gamma 6	140727	MAPK signaling pathway; Cardiac muscle contraction; Hypertrophic cardiomyopathy (HCM); Arrhythmogenic right ventricular cardiomyopathy (ARVC); Dilated cardiomyopathy	voltage-gated ion channel activity; calcium channel regulator activity; calcium channel activity; regulation of ion transmembrane transport; calcium ion transmembrane transport; L-type voltage-gated calcium channel complex
Il1r2	interleukin 1 receptor type 2	117022	MAPK signaling pathway; Cytokine-cytokine receptor interaction; Hematopoietic cell lineage; Amoebiasis	interleukin-1 receptor activity; interleukin-1, type II, blocking receptor activity; extracellular region; cytoplasm; plasma membrane; negative regulation of protein processing; integral component of membrane; cytokine-mediated signaling pathway; interleukin-1 binding; negative regulation of interleukin-1 alpha secretion; negative regulation of cytokine production involved in inflammatory respons…
Bdnf	brain-derived neurotrophic factor	24225	MAPK signaling pathway; Neurotrophin signaling pathway; Huntington's disease	ureteric bud development; behavioral fear response; response to hypoxia; chronic inflammatory response; neurotrophin TRKB receptor binding; extracellular region; extracellular space; cytoplasm; mitochondrion; mitochondrial electron transport, NADH to ubiquinone; transmembrane receptor protein tyrosine kinase signaling pathway; gamma-aminobutyric acid signaling pathway; nervous system development;…
Creb3l3	cAMP responsive element binding protein 3-like 3	314638	Melanogenesis; Vasopressin-regulated water reabsorption; Huntington's disease; Prostate cancer	transcription regulatory region sequence-specific DNA binding; RNA polymerase II regulatory region sequence-specific DNA binding; DNA-binding transcription activator activity, RNA polymerase II-specific; molecular_function; cellular_component; nucleus; endoplasmic reticulum; endoplasmic reticulum membrane; biological_process; membrane; integral component of membrane; endoplasmic reticulum unfolde…
Ppp2r2b	protein phosphatase 2, regulatory subunit B, beta	60660	mRNA surveillance pathway; Tight junction; Chagas disease (American trypanosomiasis); Hepatitis C	protein phosphatase type 2A complex; mitochondrial fission; mitotic cell cycle; protein serine/threonine phosphatase activity; protein binding; cytoplasm; mitochondrion; mitochondrial outer membrane; cytosol; cytoskeleton; protein targeting to mitochondrion; spermatid development; brain development; membrane; protein phosphatase regulator activity; neuron differentiation; positive regulation of n…
Chrna4	cholinergic receptor nicotinic alpha 4 subunit	25590	Neuroactive ligand-receptor interaction	action potential; response to hypoxia; transmembrane signaling receptor activity; ion channel activity; extracellular ligand-gated ion channel activity; protein binding; plasma membrane; integral component of plasma membrane; acetylcholine-gated channel complex; DNA repair; calcium ion transport; response to oxidative stress; signal transduction; chemical synaptic transmission; synaptic transmiss…
Gabra3	gamma-aminobutyric acid type A receptor alpha3 subunit	24947	Neuroactive ligand-receptor interaction	GABA-A receptor activity; extracellular ligand-gated ion channel activity; inhibitory extracellular ligand-gated ion channel activity; chloride channel activity; protein binding; integral component of plasma membrane; signal transduction; gamma-aminobutyric acid signaling pathway; chemical synaptic transmission; benzodiazepine receptor activity; GABA-gated chloride ion channel activity; cell junc…
Grm3	glutamate metabotropic receptor 3	24416	Neuroactive ligand-receptor interaction	group II metabotropic glutamate receptor activity; calcium channel regulator activity; plasma membrane; integral component of plasma membrane; adenylate cyclase-inhibiting G protein-coupled glutamate receptor signaling pathway; G protein-coupled glutamate receptor signaling pathway; glutamate receptor activity; postsynaptic density; sensory perception of pain; axon; presynaptic membrane; neuron p…
Lpar4	lysophosphatidic acid receptor 4	302378	Neuroactive ligand-receptor interaction	G protein-coupled receptor activity; plasma membrane; integral component of plasma membrane; nuclear body; positive regulation of Rho protein signal transduction; lysophosphatidic acid binding; intracellular membrane-bounded organelle; positive regulation of cytosolic calcium ion concentration involved in phospholipase C-activating G protein-coupled signaling pathway; lysophosphatidic acid recept…
Mtnr1a	melatonin receptor 1A	114211	Neuroactive ligand-receptor interaction	molecular_function; G protein-coupled receptor activity; plasma membrane; integral component of plasma membrane; G protein-coupled receptor signaling pathway; adenylate cyclase-inhibiting G protein-coupled receptor signaling pathway; aging; circadian rhythm; melatonin receptor activity; integral component of membrane; hormone binding; camera-type eye development; neuronal cell body; receptor comp…
Sstr2	somatostatin receptor 2	54305	Neuroactive ligand-receptor interaction; Gastric acid secretion	G protein-coupled receptor activity; somatostatin receptor activity; cytoplasm; cytosol; plasma membrane; integral component of plasma membrane; regulation of muscle contraction; G protein-coupled receptor signaling pathway; adenylate cyclase-inhibiting G protein-coupled receptor signaling pathway; neuropeptide signaling pathway; spermatogenesis; membrane; cerebellum development; PDZ domain bindi…
Gh1	growth hormone 1	24391	Neuroactive ligand-receptor interaction; Jak-STAT signaling pathway	growth hormone receptor binding; prolactin receptor binding; hormone activity; extracellular region; extracellular space; nucleus; mitochondrion; trans-Golgi network; cytosol; plasma membrane; neuroblast proliferation; female pregnancy; growth factor activity; response to light stimulus; regulation of signaling receptor activity; positive regulation of activation of Janus kinase activity; positiv…
Calcr	calcitonin receptor	116506	Neuroactive ligand-receptor interaction; Osteoclast differentiation	calcitonin gene-related peptide receptor activity; acrosomal vesicle; calcitonin receptor activity; plasma membrane; cilium; cell surface receptor signaling pathway; G protein-coupled receptor signaling pathway; adenylate cyclase-modulating G protein-coupled receptor signaling pathway; adenylate cyclase-activating G protein-coupled receptor signaling pathway; activation of phospholipase C activit…
Bst1	bone marrow stromal cell antigen 1	81506	Nicotinate and nicotinamide metabolism; Metabolic pathways; Calcium signaling pathway; Salivary secretion; Pancreatic secretion	uropod; regulation of cell-matrix adhesion; molecular_function; NAD+ nucleosidase activity; cellular_component; plasma membrane; biological_process; positive regulation of cell proliferation; integrin complex; transferase activity; phosphorus-oxygen lyase activity; extrinsic component of membrane; positive regulation of B cell proliferation; anchored component of membrane; regulation of actin cyt…
Dll3	delta like canonical Notch ligand 3	114125	Notch signaling pathway	skeletal system development; cell fate determination; somitogenesis; Notch binding; calcium ion binding; cellular_component; plasma membrane; Notch signaling pathway; compartment pattern specification; central nervous system development; tissue development; integral component of membrane; negative regulation of Notch signaling pathway; paraxial mesoderm development; negative regulation of astrocy…
Aph1b	aph-1 homolog B, gamma secretase subunit	300802	Notch signaling pathway; Alzheimer's disease	molecular_function; endopeptidase activity; cellular_component; endoplasmic reticulum; integral component of plasma membrane; Notch signaling pathway; Notch receptor processing; locomotory behavior; peptidase activity; integral component of membrane; protein processing; transport vesicle; positive regulation of catalytic activity; gamma-secretase complex
Olr1588	olfactory receptor 1588	289250	Olfactory transduction	G protein-coupled receptor activity; olfactory receptor activity; plasma membrane; G protein-coupled receptor signaling pathway; integral component of membrane; detection of chemical stimulus involved in sensory perception of smell
Clca5	chloride channel calcium activated 5	308016	Olfactory transduction; Pancreatic secretion	intracellular calcium activated chloride channel activity; chloride channel activity; nucleus; cytosol; plasma membrane; integral component of plasma membrane; chloride transport; ligand-gated ion channel activity; cell junction; nuclear membrane; chloride transmembrane transport
Fut7	fucosyltransferase 7	296564	Other types of O-glycan biosynthesis; Glycosphingolipid biosynthesis - lacto and neolacto series; Metabolic pathways	CD4-positive, CD25-positive, alpha-beta regulatory T cell differentiation; leukocyte migration involved in immune response; Golgi apparatus; protein glycosylation; ceramide metabolic process; fucosyltransferase activity; integral component of membrane; Golgi cisterna membrane; fucosylation; alpha-(1->3)-fucosyltransferase activity
Ndufa4l2	NDUFA4, mitochondrial complex associated like 2	100362331	Oxidative phosphorylation; Metabolic pathways; Alzheimer's disease; Parkinson's disease; Huntington's disease	cytochrome-c oxidase activity; mitochondrial respiratory chain complex IV; integral component of membrane; electron transport chain; proton transmembrane transport
Atp6v0d2	ATPase H+ transporting V0 subunit D2	297932	Oxidative phosphorylation; Metabolic pathways; Lysosome; Phagosome; Collecting duct acid secretion; Rheumatoid arthritis	molecular_function; lysosomal membrane; endosome; early endosome; vacuolar transport; vacuolar acidification; biological_process; proton-exporting ATPase activity, phosphorylative mechanism; ATP hydrolysis coupled proton transport; membrane; apical plasma membrane; vacuolar proton-transporting V-type ATPase complex; proton-transporting V-type ATPase, V0 domain; plasma membrane proton-transporting…
Pex11a	peroxisomal biogenesis factor 11 alpha	85249	Peroxisome	peroxisome; peroxisomal membrane; integral component of peroxisomal membrane; peroxisome organization; signal transduction; peroxisome membrane biogenesis; peroxisome fission; protein-containing complex; protein homodimerization activity; regulation of peroxisome size; brown fat cell differentiation
Cd209f	CD209f antigen	688750	Phagosome	integral component of membrane; carbohydrate binding
Clec7a	C-type lectin domain containing 7A	502902	Phagosome	pattern recognition receptor signaling pathway; nucleoplasm; phagocytosis, recognition; cell recognition; signaling pattern recognition receptor activity; integral component of membrane; carbohydrate binding; intracellular membrane-bounded organelle
C3	complement C3	24232	Phagosome; Complement and coagulation cascades; Leishmaniasis; Chagas disease (American trypanosomiasis); Staphylococcus aureus infection; Systemic lupus erythematosus	positive regulation of type IIa hypersensitivity; positive regulation of protein phosphorylation; positive regulation of activation of membrane attack complex; tolerance induction; endopeptidase inhibitor activity; protein binding; extracellular space; fatty acid metabolic process; chemotaxis; inflammatory response; complement activation; complement activation, alternative pathway; complement act…
Tubb1	tubulin, beta 1 class VI	679312	Phagosome; Gap junction	microtubule cytoskeleton organization; mitotic cell cycle; GTPase activity; structural constituent of cytoskeleton; GTP binding; cytoplasm; microtubule; microtubule-based process; spindle assembly
Thbs2	thrombospondin 2	292406	Phagosome; TGF-beta signaling pathway; Focal adhesion; ECM-receptor interaction; Malaria	calcium ion binding; basement membrane; cell adhesion; negative regulation of angiogenesis; extracellular matrix; platelet alpha granule; positive regulation of synapse assembly; collagen-containing extracellular matrix
Hmox1	heme oxygenase 1	24451	Porphyrin and chlorophyll metabolism	angiogenesis; response to hypoxia; wound healing involved in inflammatory response; heme oxygenase (decyclizing) activity; phospholipase D activity; protein binding; nucleus; nucleolus; endoplasmic reticulum; endoplasmic reticulum membrane; cytosol; plasma membrane; caveola; phospholipid metabolic process; heme oxidation; cellular iron ion homeostasis; response to oxidative stress; small GTPase m…
Plin1	perilipin 1	25629	PPAR signaling pathway	molecular_function; endoplasmic reticulum; lipid droplet; cytosol; lipid metabolic process; biological_process; lipid catabolic process
Fabp1	fatty acid binding protein 1	24360	PPAR signaling pathway; Fat digestion and absorption	chromatin binding; long-chain fatty acid transporter activity; fatty acid binding; protein binding; phospholipid binding; nucleus; nucleoplasm; cytoplasm; peroxisomal matrix; cytosol; drug binding; long-chain fatty acid transport; antioxidant activity; positive regulation of fatty acid beta-oxidation; bile acid binding; protein-containing complex; negative regulation of apoptotic process; negativ…
Fabp2	fatty acid binding protein 2	25598	PPAR signaling pathway; Fat digestion and absorption	long-chain fatty acid transporter activity; fatty acid binding; cytoplasm; plasma membrane; microvillus; fatty acid metabolic process; fatty acid transport; long-chain fatty acid transport; long-chain fatty acid binding; apical cortex; intestinal absorption; intestinal lipid absorption
Slc27a4	solute carrier family 27 member 4	311839	PPAR signaling pathway; Fat digestion and absorption	very long-chain fatty acid metabolic process; medium-chain fatty acid transport; long-chain fatty acid metabolic process; molecular_function; long-chain fatty acid-CoA ligase activity; long-chain fatty acid transporter activity; cellular_component; endoplasmic reticulum; endoplasmic reticulum membrane; plasma membrane; microvillus; fatty acid metabolic process; response to nutrient; long-chain fa…
Apoa1	apolipoprotein A1	25081	PPAR signaling pathway; Fat digestion and absorption; Vitamin digestion and absorption; African trypanosomiasis	amyloid-beta binding; regulation of protein phosphorylation; endothelial cell proliferation; negative regulation of cytokine secretion involved in immune response; signaling receptor binding; lipid transporter activity; protein binding; phospholipid binding; phospholipid transporter activity; extracellular region; extracellular space; nucleus; phospholipid metabolic process; phosphatidylcholine b…
Olr1	oxidized low density lipoprotein receptor 1	140914	PPAR signaling pathway; Phagosome	immune system process; low-density lipoprotein particle receptor activity; cellular_component; extracellular region; nucleoplasm; plasma membrane; inflammatory response; leukocyte cell-cell adhesion; cell death; negative regulation of gene expression; integral component of membrane; vesicle-mediated transport; carbohydrate binding; positive regulation of superoxide anion generation; lipoprotein m…
Cyp27a1	cytochrome P450, family 27, subfamily a, polypeptide 1	301517	Primary bile acid biosynthesis; Metabolic pathways; PPAR signaling pathway	iron ion binding; mitochondrion; mitochondrial envelope; mitochondrial inner membrane; bile acid biosynthetic process; C21-steroid hormone biosynthetic process; steroid catabolic process; cholesterol catabolic process; cholesterol 7-alpha-monooxygenase activity; cholesterol metabolic process; cholesterol monooxygenase (side-chain-cleaving) activity; heme binding; vitamin D3 25-hydroxylase activit…
Slc27a5	solute carrier family 27 member 5	79111	Primary bile acid biosynthesis; Metabolic pathways; PPAR signaling pathway; Bile secretion	very long-chain fatty acid metabolic process; long-chain fatty acid metabolic process; long-chain fatty acid-CoA ligase activity; long-chain fatty acid transporter activity; ATP binding; endoplasmic reticulum; triglyceride mobilization; bile acid biosynthetic process; bile acid metabolic process; basal plasma membrane; fatty acid transmembrane transporter activity; fatty acid transport; plasma me…
Rag1	recombination activating 1	84600	Primary immunodeficiency	adaptive immune response; pre-B cell allelic exclusion; molecular_function; endonuclease activity; ubiquitin-protein transferase activity; cellular_component; nucleus; zinc ion binding; visual learning; histone monoubiquitination; B cell differentiation; T cell differentiation in thymus; V(D)J recombination; histone binding; identical protein binding; protein homodimerization activity; T cell hom…
Pomp	proteasome maturation protein	288455	Proteasome	proteasome complex; nucleus; cytoplasm; nuclear speck; proteasome assembly
Slc15a1	solute carrier family 15 member 1	117261	Protein digestion and absorption	proton-dependent oligopeptide secondary active transmembrane transporter activity; integral component of plasma membrane; brush border; oligopeptide transport; protein transport; peptide:proton symporter activity; membrane; integral component of membrane; channel inhibitor activity; dipeptide transmembrane transport; oligopeptide transmembrane transport; oligopeptide transmembrane transporter act…
Slc6a19	solute carrier family 6 member 19	664630	Protein digestion and absorption	molecular_function; neurotransmitter:sodium symporter activity; cellular_component; plasma membrane; integral component of plasma membrane; neurotransmitter transport; response to nutrient; neutral amino acid transmembrane transporter activity; neutral amino acid transport; apical plasma membrane; brush border membrane; transmembrane transport
Slc7a7	solute carrier family 7 member 7	83509	Protein digestion and absorption	regulation of arginine metabolic process; amino acid transmembrane transport; molecular_function; cellular_component; biological_process; basic amino acid transmembrane transporter activity; L-amino acid transmembrane transporter activity; integral component of membrane; basolateral plasma membrane; L-alpha-amino acid transmembrane transport; basic amino acid transmembrane transport
Xpnpep2	X-prolyl aminopeptidase 2	117522	Protein digestion and absorption	molecular_function; cellular_component; cytoplasm; plasma membrane; proteolysis; biological_process; anchored component of membrane; metal ion binding; metalloaminopeptidase activity; extracellular exosome
Ero1a	endoplasmic reticulum oxidoreductase 1 alpha	171562	Protein processing in endoplasmic reticulum	molecular_function; protein disulfide isomerase activity; endoplasmic reticulum; endoplasmic reticulum membrane; protein folding; animal organ senescence; protein disulfide oxidoreductase activity; oxidoreductase activity; oxidoreductase activity, acting on a sulfur group of donors, disulfide as acceptor; 4-hydroxyproline metabolic process; protein maturation by protein folding; extracellular mat…
Hsph1	heat shock protein family H (Hsp110) member 1	288444	Protein processing in endoplasmic reticulum	adenyl-nucleotide exchange factor activity; ATP binding; nucleus; nucleoplasm; cytoplasm; cytosol; microtubule; protein-containing complex; alpha-tubulin binding; positive regulation of transcription by RNA polymerase II; regulation of catalytic activity; chaperone cofactor-dependent protein refolding; positive regulation of protein tyrosine kinase activity; negative regulation of establishment o…
Uox	urate oxidase	114768	Purine metabolism; Caffeine metabolism; Metabolic pathways	urate oxidase activity; peroxisome; peroxisomal matrix; purine nucleobase catabolic process; urate catabolic process; oxidation-reduction process
Hprt1	hypoxanthine phosphoribosyltransferase 1	24465	Purine metabolism; Drug metabolism - other enzymes; Metabolic pathways	nucleotide binding; magnesium ion binding; T cell mediated cytotoxicity; response to amphetamine; hypoxanthine phosphoribosyltransferase activity; cytoplasm; cytosol; purine nucleotide biosynthetic process; purine ribonucleoside salvage; adenine salvage; guanine salvage; spermatogenesis; brain development; grooming behavior; locomotory behavior; striatum development; cerebral cortex neuron differ…
Ak4	adenylate kinase 4	29223	Purine metabolism; Metabolic pathways	liver development; molecular_function; adenylate kinase activity; nucleoside diphosphate kinase activity; ATP binding; GTP binding; cellular_component; mitochondrion; mitochondrial matrix; nucleoside diphosphate phosphorylation; ADP biosynthetic process; brain development; nucleoside triphosphate biosynthetic process; response to drug; AMP metabolic process; ATP metabolic process; GTP metabolic p…
Nt5c1a	5'-nucleotidase, cytosolic IA	313574	Purine metabolism; Pyrimidine metabolism; Nicotinate and nicotinamide metabolism; Metabolic pathways	nucleotide binding; magnesium ion binding; cytosol; 5'-nucleotidase activity; nucleotide metabolic process; purine nucleoside monophosphate catabolic process; dephosphorylation; adenosine metabolic process
Upp1	uridine phosphorylase 1	289801	Pyrimidine metabolism; Drug metabolism - other enzymes; Metabolic pathways	uridine phosphorylase activity; nucleus; nucleoplasm; cytoplasm; uridine catabolic process; pyrimidine nucleotide metabolic process; nucleotide catabolic process; cellular response to glucose starvation; UMP salvage; uridine metabolic process
Mme	membrane metallo-endopeptidase	24590	Renin-angiotensin system; Hematopoietic cell lineage; Protein digestion and absorption; Alzheimer's disease	phosphatidylserine binding; kidney development; placenta development; endopeptidase activity; metalloendopeptidase activity; cytoplasm; early endosome; trans-Golgi network; plasma membrane; brush border; proteolysis; peptide metabolic process; aging; learning or memory; synaptic vesicle; peptidase activity; metallopeptidase activity; exopeptidase activity; zinc ion binding; membrane; integral com…
Ace2	angiotensin I converting enzyme 2	302668	Renin-angiotensin system; Protein digestion and absorption	virus receptor activity; angiotensin-mediated drinking behavior; regulation of systemic arterial blood pressure by renin-angiotensin; endopeptidase activity; carboxypeptidase activity; metallocarboxypeptidase activity; extracellular region; extracellular space; cytoplasm; plasma membrane; proteolysis; metallopeptidase activity; exopeptidase activity; peptidyl-dipeptidase activity; cell surface; t…
Cyp26b1	cytochrome P450, family 26, subfamily b, polypeptide 1	312495	Retinol metabolism	cell fate determination; establishment of T cell polarity; kidney development; retinoic acid binding; iron ion binding; cellular_component; cytoplasm; endoplasmic reticulum membrane; xenobiotic metabolic process; inflammatory response; male meiotic nuclear division; spermatogenesis; retinoic acid 4-hydroxylase activity; proximal/distal pattern formation; positive regulation of gene expression; st…
Rfk	riboflavin kinase	499328	Riboflavin metabolism; Metabolic pathways	apoptotic process; riboflavin kinase activity; riboflavin biosynthetic process; FMN biosynthetic process; phosphorylation; positive regulation of NAD(P)H oxidase activity; reactive oxygen species metabolic process
RGD1564606	similar to 60S ribosomal protein L23a	499523	Ribosome	ribosomal large subunit assembly; structural constituent of ribosome; translation; cytosolic large ribosomal subunit
Rpl3l	ribosomal protein L3-like	287122	Ribosome	ribosomal large subunit assembly; structural constituent of ribosome; translation; cytosolic large ribosomal subunit
Pabpc1l	poly(A) binding protein, cytoplasmic 1-like	296351	RNA transport; mRNA surveillance pathway; RNA degradation	oocyte maturation; RNA binding; mRNA 3'-UTR binding; nucleus; cytoplasm; cytosol; chromatin remodeling; mRNA polyadenylation; poly(A) binding; poly(U) RNA binding; cytoplasmic stress granule; chromatin-mediated maintenance of transcription; nucleus localization; ribonucleoprotein complex
B4galt6	beta-1,4-galactosyltransferase 6	65196	Sphingolipid metabolism; Metabolic pathways	lactosylceramide biosynthetic process; carbohydrate metabolic process; protein glycosylation; glycosphingolipid biosynthetic process; galactosyltransferase activity; UDP-galactose:glucosylceramide beta-1,4-galactosyltransferase activity; ganglioside biosynthetic process via lactosylceramide; integral component of membrane; transferase activity, transferring glycosyl groups; central nervous system…
RGD1564463	similar to Mdes protein	289322	Sphingolipid metabolism; Metabolic pathways	endoplasmic reticulum membrane; integral component of membrane; sphingolipid delta-4 desaturase activity; ceramide biosynthetic process; oxidation-reduction process
Ugcg	UDP-glucose ceramide glucosyltransferase	83626	Sphingolipid metabolism; Metabolic pathways	Golgi membrane; protein lipidation; glucosylceramide biosynthetic process; ceramide glucosyltransferase activity; regulation of signal transduction; integral component of membrane; cell differentiation; keratinocyte differentiation; leptin-mediated signaling pathway; neuron development; establishment of skin barrier; intestinal lipid absorption; dihydroceramide glucosyltransferase activity; corni…
Pygm	glycogen phosphorylase, muscle associated	24701	Starch and sucrose metabolism; Insulin signaling pathway	response to hypoxia; cytoplasm; glycogen metabolic process; glycogen catabolic process; cellular calcium ion homeostasis; drug binding; glycogen phosphorylase activity; response to organic substance; AMP binding; sarcoplasmic reticulum; pyridoxal phosphate binding; carbohydrate binding; protein homodimerization activity; response to cAMP; linear malto-oligosaccharide phosphorylase activity; SHG a…
Cyp3a9	cytochrome P450, family 3, subfamily a, polypeptide 9	171352	Steroid hormone biosynthesis; Linoleic acid metabolism; Retinol metabolism; Metabolism of xenobiotics by cytochrome P450; Drug metabolism - cytochrome P450; Drug metabolism - other enzymes; Metabolic pathways	lipid hydroxylation; monooxygenase activity; iron ion binding; endoplasmic reticulum membrane; female pregnancy; sensory perception of smell; steroid metabolic process; steroid hydroxylase activity; alkaloid catabolic process; response to zinc ion; positive regulation of gene expression; integral component of membrane; oxidoreductase activity; oxidoreductase activity, acting on paired donors, wit…
Hist1h2bk	histone cluster 1 H2B family member k	680312	Systemic lupus erythematosus	nucleosome; innate immune response in mucosa; DNA binding; extracellular space; nucleus; nucleoplasm; cytosol; nucleosome assembly; antibacterial humoral response; killing of cells of other organism; protein heterodimerization activity; defense response to Gram-negative bacterium; defense response to Gram-positive bacterium; antimicrobial humoral immune response mediated by antimicrobial peptide
Hist1h4m	histone cluster 1, H4m	291152	Systemic lupus erythematosus	nuclear nucleosome; ossification; nucleoplasm; DNA replication-dependent nucleosome assembly; DNA replication-independent nucleosome assembly; DNA-templated transcription, initiation; multicellular organism development; protein domain specific binding; cell differentiation; negative regulation of megakaryocyte differentiation; protein heterodimerization activity; protein heterotetramerization
Hist2h2ab	histone cluster 2 H2A family member b	690102	Systemic lupus erythematosus	nucleosome; nuclear chromatin; DNA binding; chromatin organization; protein heterodimerization activity
Hist2h2ac	histone cluster 2 H2A family member c	499675	Systemic lupus erythematosus	nucleosome; nuclear chromatin; DNA binding; nucleus; chromatin organization; protein heterodimerization activity
Epb41l3	erythrocyte membrane protein band 4.1-like 3	116724	Tight junction	regulation of cell growth; protein localization to paranode region of axon; actin binding; structural molecule activity; cytoskeleton; plasma membrane; cell-cell junction; cytoskeletal anchoring at plasma membrane; regulation of cell shape; postsynaptic density; axolemma; cortical actin cytoskeleton organization; paranodal junction assembly; actomyosin structure organization; paranode region of a…
Myh10	myosin heavy chain 10	79433	Tight junction; Regulation of actin cytoskeleton; Viral myocarditis	microfilament motor activity; mitotic cytokinesis; in utero embryonic development; stress fiber; neuron migration; plasma membrane repair; cardiac septum development; motor activity; protein binding; calmodulin binding; ATP binding; cytoplasm; spindle; cytosol; polysome; plasma membrane; brush border; cell cortex; exocytosis; substrate-dependent cell migration, cell extension; nuclear migration; …
Ido1	indoleamine 2,3-dioxygenase 1	66029	Tryptophan metabolism; Metabolic pathways; African trypanosomiasis	immune system process; cytokine production involved in inflammatory response; positive regulation of T cell tolerance induction; positive regulation of chronic inflammatory response; positive regulation of type 2 immune response; tryptophan 2,3-dioxygenase activity; cytoplasm; cytosol; inflammatory response; amino acid binding; tryptophan catabolic process to kynurenine; oxygen binding; heme bind…
Ube2q2l	ubiquitin-conjugating enzyme E2Q family member 2-like	317341	Ubiquitin mediated proteolysis	ubiquitin conjugating enzyme activity; protein K48-linked ubiquitination
Socs1	suppressor of cytokine signaling 1	252971	Ubiquitin mediated proteolysis; Osteoclast differentiation; Jak-STAT signaling pathway; Insulin signaling pathway; Type II diabetes mellitus; Toxoplasmosis	regulation of protein phosphorylation; molecular_function; insulin-like growth factor receptor binding; cellular_component; nucleus; nucleoplasm; phosphatidylinositol 3-kinase complex; JAK-STAT cascade; regulation of activation of Janus kinase activity; protein ubiquitination; kinase inhibitor activity; cytokine-mediated signaling pathway; protein kinase binding; animal organ regeneration; cytopl…
Kcnma1	potassium calcium-activated channel subfamily M alpha 1	83731	Vascular smooth muscle contraction; Salivary secretion; Pancreatic secretion	response to hypoxia; actin binding; voltage-gated potassium channel activity; potassium channel activity; protein binding; cytoplasm; mitochondrion; endoplasmic reticulum; endoplasmic reticulum membrane; plasma membrane; caveola; potassium ion transport; response to osmotic stress; chemical synaptic transmission; aging; sensory perception of sound; circadian rhythm; adult walking behavior; voltag…
Prkcq	protein kinase C, theta	85420	Vascular smooth muscle contraction; Tight junction; Adipocytokine signaling pathway	response to hypoxia; immunological synapse; immune system process; protein serine/threonine kinase activity; protein kinase C activity; protein binding; ATP binding; nucleus; cytoplasm; microtubule organizing center; plasma membrane; regulation of transcription, DNA-templated; protein phosphorylation; membrane protein ectodomain proteolysis; inflammatory response; aging; response to heat; respons…
Slc19a3	solute carrier family 19 member 3	316559	Vitamin digestion and absorption	plasma membrane; thiamine transmembrane transporter activity; integral component of membrane; transmembrane transport; thiamine transmembrane transport
Slc23a1	solute carrier family 23 member 1	50621	Vitamin digestion and absorption	cytoplasm; plasma membrane; integral component of plasma membrane; brush border; sodium ion transport; brain development; L-ascorbate:sodium symporter activity; response to toxic substance; basal plasma membrane; sodium ion transmembrane transporter activity; L-ascorbic acid transmembrane transporter activity; L-ascorbic acid transmembrane transport; integral component of membrane; apical plasma …
Slc52a3	solute carrier family 52 member 3	311536	Vitamin digestion and absorption	nucleus; cytoplasm; plasma membrane; integral component of plasma membrane; sensory perception of sound; riboflavin transmembrane transporter activity; riboflavin transport; cellular response to heat
Wnt2b	Wnt family member 2B	116466	Wnt signaling pathway; Hedgehog signaling pathway; Melanogenesis; Pathways in cancer; Basal cell carcinoma	chondrocyte differentiation; molecular_function; frizzled binding; cellular_component; extracellular space; biological_process; male gonad development; cellular response to starvation; Wnt signaling pathway; forebrain regionalization; neuron differentiation; intracellular membrane-bounded organelle; cell fate commitment; canonical Wnt signaling pathway; lung induction; mesenchymal-epithelial cell…
